# Supplementary material for: Genome-wide Identification and Expression Analysis of RcMYB Genes in Rhodiola crenulata
Source: Front Genet. 2022 Mar 31;13:831611. doi: 10.3389/fgene.2022.831611 (PMC9008588; doi:10.3389/fgene.2022.831611)
Supplement: Supplementary file 8 [file Table4.XLSX]

## Sheet: Sheet1
	Supplementary Table 4	The detailed functional annotations of cis-elements in promoter region of RcMYBs
Gene name	Gene ID	locus+	locus-	Cis-element				Functional annotations
RcMYB1	CCG029595.1	322	362	TATA-box				core promoter element around -30 of transcription start
RcMYB1	CCG029595.1	323	363	TATA-box				core promoter element around -30 of transcription start
RcMYB1	CCG029595.1	401	441	TATA-box				core promoter element around -30 of transcription start
RcMYB1	CCG029595.1	420	460	TATA-box				core promoter element around -30 of transcription start
RcMYB1	CCG029595.1	421	461	TATA-box				core promoter element around -30 of transcription start
RcMYB1	CCG029595.1	422	462	TATA-box				core promoter element around -30 of transcription start
RcMYB1	CCG029595.1	504	544	TATA-box				core promoter element around -30 of transcription start
RcMYB1	CCG029595.1	505	545	TATA-box				core promoter element around -30 of transcription start
RcMYB1	CCG029595.1	520	560	TATA-box				core promoter element around -30 of transcription start
RcMYB1	CCG029595.1	560	600	TATA-box				core promoter element around -30 of transcription start
RcMYB1	CCG029595.1	561	601	TATA-box				core promoter element around -30 of transcription start
RcMYB1	CCG029595.1	562	602	TATA-box				core promoter element around -30 of transcription start
RcMYB1	CCG029595.1	563	603	TATA-box				core promoter element around -30 of transcription start
RcMYB1	CCG029595.1	873	913	TATA-box				core promoter element around -30 of transcription start
RcMYB1	CCG029595.1	874	914	TATA-box				core promoter element around -30 of transcription start
RcMYB1	CCG029595.1	1094	1134	TATA-box				core promoter element around -30 of transcription start
RcMYB1	CCG029595.1	1095	1135	TATA-box				core promoter element around -30 of transcription start
RcMYB1	CCG029595.1	1096	1136	TATA-box				core promoter element around -30 of transcription start
RcMYB1	CCG029595.1	1176	1216	TATA-box				core promoter element around -30 of transcription start
RcMYB1	CCG029595.1	1239	1279	TATA-box				core promoter element around -30 of transcription start
RcMYB1	CCG029595.1	1240	1280	TATA-box				core promoter element around -30 of transcription start
RcMYB1	CCG029595.1	1241	1281	TATA-box				core promoter element around -30 of transcription start
RcMYB1	CCG029595.1	1242	1282	TATA-box				core promoter element around -30 of transcription start
RcMYB1	CCG029595.1	1243	1283	TATA-box				core promoter element around -30 of transcription start
RcMYB1	CCG029595.1	1257	1297	TATA-box				core promoter element around -30 of transcription start
RcMYB1	CCG029595.1	1258	1298	TATA-box				core promoter element around -30 of transcription start
RcMYB1	CCG029595.1	1277	1317	TATA-box				core promoter element around -30 of transcription start
RcMYB1	CCG029595.1	1310	1350	TATA-box				core promoter element around -30 of transcription start
RcMYB1	CCG029595.1	1311	1351	TATA-box				core promoter element around -30 of transcription start
RcMYB1	CCG029595.1	1312	1352	TATA-box				core promoter element around -30 of transcription start
RcMYB1	CCG029595.1	1313	1353	TATA-box				core promoter element around -30 of transcription start
RcMYB1	CCG029595.1	1336	1376	TATA-box				core promoter element around -30 of transcription start
RcMYB1	CCG029595.1	1337	1377	TATA-box				core promoter element around -30 of transcription start
RcMYB1	CCG029595.1	1397	1437	TATA-box				core promoter element around -30 of transcription start
RcMYB1	CCG029595.1	1398	1438	TATA-box				core promoter element around -30 of transcription start
RcMYB1	CCG029595.1	1399	1439	TATA-box				core promoter element around -30 of transcription start
RcMYB1	CCG029595.1	1563	1603	TATA-box				core promoter element around -30 of transcription start
RcMYB1	CCG029595.1	1564	1604	TATA-box				core promoter element around -30 of transcription start
RcMYB1	CCG029595.1	1565	1605	TATA-box				core promoter element around -30 of transcription start
RcMYB1	CCG029595.1	1574	1614	TATA-box				core promoter element around -30 of transcription start
RcMYB1	CCG029595.1	1575	1615	TATA-box				core promoter element around -30 of transcription start
RcMYB1	CCG029595.1	1592	1632	TATA-box				core promoter element around -30 of transcription start
RcMYB1	CCG029595.1	1763	1803	TATA-box				core promoter element around -30 of transcription start
RcMYB1	CCG029595.1	1106	1146	TCT-motif				part of a light responsive element
RcMYB1	CCG029595.1	-14	26	CAAT-box				common cis-acting element in promoter and enhancer regions
RcMYB1	CCG029595.1	61	101	CAAT-box				common cis-acting element in promoter and enhancer regions
RcMYB1	CCG029595.1	77	117	CAAT-box				common cis-acting element in promoter and enhancer regions
RcMYB1	CCG029595.1	99	139	CAAT-box				common cis-acting element in promoter and enhancer regions
RcMYB1	CCG029595.1	175	215	CAAT-box				common cis-acting element in promoter and enhancer regions
RcMYB1	CCG029595.1	224	264	CAAT-box				common cis-acting element in promoter and enhancer regions
RcMYB1	CCG029595.1	286	326	CAAT-box				common cis-acting element in promoter and enhancer regions
RcMYB1	CCG029595.1	351	391	CAAT-box				common cis-acting element in promoter and enhancer regions
RcMYB1	CCG029595.1	627	667	CAAT-box				common cis-acting element in promoter and enhancer regions
RcMYB1	CCG029595.1	749	789	CAAT-box				common cis-acting element in promoter and enhancer regions
RcMYB1	CCG029595.1	893	933	CAAT-box				common cis-acting element in promoter and enhancer regions
RcMYB1	CCG029595.1	1081	1121	CAAT-box				common cis-acting element in promoter and enhancer regions
RcMYB1	CCG029595.1	1147	1187	CAAT-box				common cis-acting element in promoter and enhancer regions
RcMYB1	CCG029595.1	1159	1199	CAAT-box				common cis-acting element in promoter and enhancer regions
RcMYB1	CCG029595.1	1290	1330	CAAT-box				common cis-acting element in promoter and enhancer regions
RcMYB1	CCG029595.1	1304	1344	CAAT-box				common cis-acting element in promoter and enhancer regions
RcMYB1	CCG029595.1	1461	1501	CAAT-box				common cis-acting element in promoter and enhancer regions
RcMYB1	CCG029595.1	1475	1515	CAAT-box				common cis-acting element in promoter and enhancer regions
RcMYB1	CCG029595.1	1624	1664	CAAT-box				common cis-acting element in promoter and enhancer regions
RcMYB1	CCG029595.1	1643	1683	CAAT-box				common cis-acting element in promoter and enhancer regions
RcMYB1	CCG029595.1	1705	1745	CAAT-box				common cis-acting element in promoter and enhancer regions
RcMYB1	CCG029595.1	1808	1848	CAAT-box				common cis-acting element in promoter and enhancer regions
RcMYB1	CCG029595.1	1880	1920	CAAT-box				common cis-acting element in promoter and enhancer regions
RcMYB1	CCG029595.1	1920	1960	CAAT-box				common cis-acting element in promoter and enhancer regions
RcMYB1	CCG029595.1	1925	1965	CAAT-box				common cis-acting element in promoter and enhancer regions
RcMYB1	CCG029595.1	1845	1885	GT1-motif				light responsive element
RcMYB1	CCG029595.1	959	999	MRE				MYB binding site involved in light responsiveness
RcMYB1	CCG029595.1	1435	1475	MRE				MYB binding site involved in light responsiveness
RcMYB1	CCG029595.1	607	647	CAT-box				cis-acting regulatory element related to meristem expression
RcMYB1	CCG029595.1	1737	1777	CAT-box				cis-acting regulatory element related to meristem expression
RcMYB1	CCG029595.1	425	465	Box 4				part of a conserved DNA module involved in light responsiveness
RcMYB1	CCG029595.1	1262	1302	Box 4				part of a conserved DNA module involved in light responsiveness
RcMYB1	CCG029595.1	533	573	TC-rich repeats				cis-acting element involved in defense and stress responsiveness
RcMYB1	CCG029595.1	1106	1146	TC-rich repeats				cis-acting element involved in defense and stress responsiveness
RcMYB1	CCG029595.1	1078	1118	ARE				cis-acting regulatory element essential for the anaerobic induction
RcMYB1	CCG029595.1	101	141	GATA-motif				part of a light responsive element
RcMYB1	CCG029595.1	734	774	G-box				cis-acting regulatory element involved in light responsiveness
RcMYB1	CCG029595.1	823	863	G-box				cis-acting regulatory element involved in light responsiveness
RcMYB1	CCG029595.1	735	775	ABRE				cis-acting element involved in the abscisic acid responsiveness
RcMYB1	CCG029595.1	813	853	ABRE				cis-acting element involved in the abscisic acid responsiveness
RcMYB2	CCG021770.1	571	611	CAAT-box				common cis-acting element in promoter and enhancer regions
RcMYB2	CCG021770.1	722	762	CAAT-box				common cis-acting element in promoter and enhancer regions
RcMYB2	CCG021770.1	781	821	CAAT-box				common cis-acting element in promoter and enhancer regions
RcMYB2	CCG021770.1	793	833	CAAT-box				common cis-acting element in promoter and enhancer regions
RcMYB2	CCG021770.1	801	841	CAAT-box				common cis-acting element in promoter and enhancer regions
RcMYB2	CCG021770.1	865	905	CAAT-box				common cis-acting element in promoter and enhancer regions
RcMYB2	CCG021770.1	875	915	CAAT-box				common cis-acting element in promoter and enhancer regions
RcMYB2	CCG021770.1	919	959	CAAT-box				common cis-acting element in promoter and enhancer regions
RcMYB2	CCG021770.1	992	1032	CAAT-box				common cis-acting element in promoter and enhancer regions
RcMYB2	CCG021770.1	1163	1203	CAAT-box				common cis-acting element in promoter and enhancer regions
RcMYB2	CCG021770.1	1199	1239	CAAT-box				common cis-acting element in promoter and enhancer regions
RcMYB2	CCG021770.1	1202	1242	CAAT-box				common cis-acting element in promoter and enhancer regions
RcMYB2	CCG021770.1	1249	1289	CAAT-box				common cis-acting element in promoter and enhancer regions
RcMYB2	CCG021770.1	1327	1367	CAAT-box				common cis-acting element in promoter and enhancer regions
RcMYB2	CCG021770.1	1468	1508	CAAT-box				common cis-acting element in promoter and enhancer regions
RcMYB2	CCG021770.1	1518	1558	CAAT-box				common cis-acting element in promoter and enhancer regions
RcMYB2	CCG021770.1	1653	1693	CAAT-box				common cis-acting element in promoter and enhancer regions
RcMYB2	CCG021770.1	1705	1745	CAAT-box				common cis-acting element in promoter and enhancer regions
RcMYB2	CCG021770.1	1741	1781	CAAT-box				common cis-acting element in promoter and enhancer regions
RcMYB2	CCG021770.1	408	448	GT1-motif				light responsive element
RcMYB2	CCG021770.1	1374	1414	GT1-motif				light responsive element
RcMYB2	CCG021770.1	141	181	TATA-box				core promoter element around -30 of transcription start
RcMYB2	CCG021770.1	314	354	TATA-box				core promoter element around -30 of transcription start
RcMYB2	CCG021770.1	589	629	TATA-box				core promoter element around -30 of transcription start
RcMYB2	CCG021770.1	590	630	TATA-box				core promoter element around -30 of transcription start
RcMYB2	CCG021770.1	591	631	TATA-box				core promoter element around -30 of transcription start
RcMYB2	CCG021770.1	860	900	TATA-box				core promoter element around -30 of transcription start
RcMYB2	CCG021770.1	861	901	TATA-box				core promoter element around -30 of transcription start
RcMYB2	CCG021770.1	862	902	TATA-box				core promoter element around -30 of transcription start
RcMYB2	CCG021770.1	905	945	TATA-box				core promoter element around -30 of transcription start
RcMYB2	CCG021770.1	906	946	TATA-box				core promoter element around -30 of transcription start
RcMYB2	CCG021770.1	907	947	TATA-box				core promoter element around -30 of transcription start
RcMYB2	CCG021770.1	1048	1088	TATA-box				core promoter element around -30 of transcription start
RcMYB2	CCG021770.1	1049	1089	TATA-box				core promoter element around -30 of transcription start
RcMYB2	CCG021770.1	1051	1091	TATA-box				core promoter element around -30 of transcription start
RcMYB2	CCG021770.1	1416	1456	TATA-box				core promoter element around -30 of transcription start
RcMYB2	CCG021770.1	1417	1457	TATA-box				core promoter element around -30 of transcription start
RcMYB2	CCG021770.1	1418	1458	TATA-box				core promoter element around -30 of transcription start
RcMYB2	CCG021770.1	1419	1459	TATA-box				core promoter element around -30 of transcription start
RcMYB2	CCG021770.1	1569	1609	TATA-box				core promoter element around -30 of transcription start
RcMYB2	CCG021770.1	1571	1611	TATA-box				core promoter element around -30 of transcription start
RcMYB2	CCG021770.1	1673	1713	TATA-box				core promoter element around -30 of transcription start
RcMYB2	CCG021770.1	1674	1714	TATA-box				core promoter element around -30 of transcription start
RcMYB2	CCG021770.1	1675	1715	TATA-box				core promoter element around -30 of transcription start
RcMYB2	CCG021770.1	1676	1716	TATA-box				core promoter element around -30 of transcription start
RcMYB2	CCG021770.1	1677	1717	TATA-box				core promoter element around -30 of transcription start
RcMYB2	CCG021770.1	1735	1775	TATA-box				core promoter element around -30 of transcription start
RcMYB2	CCG021770.1	1752	1792	TATA-box				core promoter element around -30 of transcription start
RcMYB2	CCG021770.1	1754	1794	TATA-box				core promoter element around -30 of transcription start
RcMYB2	CCG021770.1	1853	1893	TATA-box				core promoter element around -30 of transcription start
RcMYB2	CCG021770.1	1854	1894	TATA-box				core promoter element around -30 of transcription start
RcMYB2	CCG021770.1	1855	1895	TATA-box				core promoter element around -30 of transcription start
RcMYB2	CCG021770.1	1856	1896	TATA-box				core promoter element around -30 of transcription start
RcMYB2	CCG021770.1	1857	1897	TATA-box				core promoter element around -30 of transcription start
RcMYB2	CCG021770.1	1858	1898	TATA-box				core promoter element around -30 of transcription start
RcMYB2	CCG021770.1	1859	1899	TATA-box				core promoter element around -30 of transcription start
RcMYB2	CCG021770.1	1860	1900	TATA-box				core promoter element around -30 of transcription start
RcMYB2	CCG021770.1	1861	1901	TATA-box				core promoter element around -30 of transcription start
RcMYB2	CCG021770.1	1862	1902	TATA-box				core promoter element around -30 of transcription start
RcMYB2	CCG021770.1	1863	1903	TATA-box				core promoter element around -30 of transcription start
RcMYB2	CCG021770.1	1864	1904	TATA-box				core promoter element around -30 of transcription start
RcMYB2	CCG021770.1	1865	1905	TATA-box				core promoter element around -30 of transcription start
RcMYB2	CCG021770.1	1866	1906	TATA-box				core promoter element around -30 of transcription start
RcMYB2	CCG021770.1	1920	1960	TATA-box				core promoter element around -30 of transcription start
RcMYB2	CCG021770.1	127	167	TGA-element				auxin-responsive element
RcMYB2	CCG021770.1	1208	1248	TGA-element				auxin-responsive element
RcMYB2	CCG021770.1	1497	1537	CCAAT-box				MYBHv1 binding site
RcMYB2	CCG021770.1	1376	1416	MRE				MYB binding site involved in light responsiveness
RcMYB2	CCG021770.1	1391	1431	MRE				MYB binding site involved in light responsiveness
RcMYB2	CCG021770.1	460	500	CAT-box				cis-acting regulatory element related to meristem expression
RcMYB2	CCG021770.1	1076	1116	Box 4				part of a conserved DNA module involved in light responsiveness
RcMYB2	CCG021770.1	1266	1306	Box 4				part of a conserved DNA module involved in light responsiveness
RcMYB2	CCG021770.1	1305	1345	Box 4				part of a conserved DNA module involved in light responsiveness
RcMYB2	CCG021770.1	1637	1677	Box 4				part of a conserved DNA module involved in light responsiveness
RcMYB2	CCG021770.1	1931	1971	Box 4				part of a conserved DNA module involved in light responsiveness
RcMYB2	CCG021770.1	600	640	TGACG-motif				cis-acting regulatory element involved in the MeJA-responsiveness
RcMYB2	CCG021770.1	247	287	TC-rich repeats				cis-acting element involved in defense and stress responsiveness
RcMYB2	CCG021770.1	568	608	ARE				cis-acting regulatory element essential for the anaerobic induction
RcMYB2	CCG021770.1	548	588	GCN4_motif				cis-regulatory element involved in endosperm expression
RcMYB2	CCG021770.1	1138	1178	G-box				cis-acting regulatory element involved in light responsiveness
RcMYB2	CCG021770.1	1691	1731	G-box				cis-acting regulatory element involved in light responsiveness
RcMYB2	CCG021770.1	600	640	CGTCA-motif				cis-acting regulatory element involved in the MeJA-responsiveness
RcMYB2	CCG021770.1	976	1016	ABRE				cis-acting element involved in the abscisic acid responsiveness
RcMYB2	CCG021770.1	1138	1178	ABRE				cis-acting element involved in the abscisic acid responsiveness
RcMYB2	CCG021770.1	1691	1731	ABRE				cis-acting element involved in the abscisic acid responsiveness
RcMYB2	CCG021770.1	384	424	TCA-element				cis-acting element involved in salicylic acid responsiveness
RcMYB2	CCG021770.1	975	1015	G-Box				cis-acting regulatory element involved in light responsiveness
RcMYB3	CCG029219.1	117	157	TATA-box				core promoter element around -30 of transcription start
RcMYB3	CCG029219.1	118	158	TATA-box				core promoter element around -30 of transcription start
RcMYB3	CCG029219.1	119	159	TATA-box				core promoter element around -30 of transcription start
RcMYB3	CCG029219.1	410	450	TATA-box				core promoter element around -30 of transcription start
RcMYB3	CCG029219.1	506	546	TATA-box				core promoter element around -30 of transcription start
RcMYB3	CCG029219.1	543	583	TATA-box				core promoter element around -30 of transcription start
RcMYB3	CCG029219.1	555	595	TATA-box				core promoter element around -30 of transcription start
RcMYB3	CCG029219.1	556	596	TATA-box				core promoter element around -30 of transcription start
RcMYB3	CCG029219.1	557	597	TATA-box				core promoter element around -30 of transcription start
RcMYB3	CCG029219.1	679	719	TATA-box				core promoter element around -30 of transcription start
RcMYB3	CCG029219.1	733	773	TATA-box				core promoter element around -30 of transcription start
RcMYB3	CCG029219.1	931	971	TATA-box				core promoter element around -30 of transcription start
RcMYB3	CCG029219.1	1422	1462	TATA-box				core promoter element around -30 of transcription start
RcMYB3	CCG029219.1	1423	1463	TATA-box				core promoter element around -30 of transcription start
RcMYB3	CCG029219.1	1424	1464	TATA-box				core promoter element around -30 of transcription start
RcMYB3	CCG029219.1	1433	1473	TATA-box				core promoter element around -30 of transcription start
RcMYB3	CCG029219.1	1434	1474	TATA-box				core promoter element around -30 of transcription start
RcMYB3	CCG029219.1	1435	1475	TATA-box				core promoter element around -30 of transcription start
RcMYB3	CCG029219.1	1436	1476	TATA-box				core promoter element around -30 of transcription start
RcMYB3	CCG029219.1	667	707	CAAT-box				common cis-acting element in promoter and enhancer regions
RcMYB3	CCG029219.1	698	738	CAAT-box				common cis-acting element in promoter and enhancer regions
RcMYB3	CCG029219.1	885	925	CAAT-box				common cis-acting element in promoter and enhancer regions
RcMYB3	CCG029219.1	934	974	CAAT-box				common cis-acting element in promoter and enhancer regions
RcMYB3	CCG029219.1	1044	1084	CAAT-box				common cis-acting element in promoter and enhancer regions
RcMYB3	CCG029219.1	1061	1101	CAAT-box				common cis-acting element in promoter and enhancer regions
RcMYB3	CCG029219.1	1116	1156	CAAT-box				common cis-acting element in promoter and enhancer regions
RcMYB3	CCG029219.1	1271	1311	CAAT-box				common cis-acting element in promoter and enhancer regions
RcMYB3	CCG029219.1	1321	1361	CAAT-box				common cis-acting element in promoter and enhancer regions
RcMYB3	CCG029219.1	1334	1374	CAAT-box				common cis-acting element in promoter and enhancer regions
RcMYB3	CCG029219.1	1344	1384	CAAT-box				common cis-acting element in promoter and enhancer regions
RcMYB3	CCG029219.1	1352	1392	CAAT-box				common cis-acting element in promoter and enhancer regions
RcMYB3	CCG029219.1	1835	1875	CAAT-box				common cis-acting element in promoter and enhancer regions
RcMYB3	CCG029219.1	508	548	P-box				gibberellin-responsive element
RcMYB3	CCG029219.1	1207	1247	GT1-motif				light responsive element
RcMYB3	CCG029219.1	1210	1250	I-box				part of a light responsive element
RcMYB3	CCG029219.1	1000	1040	LTR				cis-acting element involved in low-temperature responsiveness
RcMYB3	CCG029219.1	1675	1715	LTR				cis-acting element involved in low-temperature responsiveness
RcMYB3	CCG029219.1	1135	1175	CCAAT-box				MYBHv1 binding site
RcMYB3	CCG029219.1	446	486	MRE				MYB binding site involved in light responsiveness
RcMYB3	CCG029219.1	289	329	Box 4				part of a conserved DNA module involved in light responsiveness
RcMYB3	CCG029219.1	1237	1277	Box 4				part of a conserved DNA module involved in light responsiveness
RcMYB3	CCG029219.1	1777	1817	TGACG-motif				cis-acting regulatory element involved in the MeJA-responsiveness
RcMYB3	CCG029219.1	1777	1817	CGTCA-motif				cis-acting regulatory element involved in the MeJA-responsiveness
RcMYB3	CCG029219.1	1485	1525	ABRE				cis-acting element involved in the abscisic acid responsiveness
RcMYB3	CCG029219.1	1963	2003	ABRE				cis-acting element involved in the abscisic acid responsiveness
RcMYB3	CCG029219.1	1962	2002	G-Box				cis-acting regulatory element involved in light responsiveness
RcMYB4	CCG030607.1	736	776	TATA-box				core promoter element around -30 of transcription start
RcMYB4	CCG030607.1	741	781	TATA-box				core promoter element around -30 of transcription start
RcMYB4	CCG030607.1	742	782	TATA-box				core promoter element around -30 of transcription start
RcMYB4	CCG030607.1	1209	1249	TATA-box				core promoter element around -30 of transcription start
RcMYB4	CCG030607.1	1223	1263	TATA-box				core promoter element around -30 of transcription start
RcMYB4	CCG030607.1	1400	1440	TATA-box				core promoter element around -30 of transcription start
RcMYB4	CCG030607.1	1401	1441	TATA-box				core promoter element around -30 of transcription start
RcMYB4	CCG030607.1	1402	1442	TATA-box				core promoter element around -30 of transcription start
RcMYB4	CCG030607.1	1403	1443	TATA-box				core promoter element around -30 of transcription start
RcMYB4	CCG030607.1	1449	1489	TATA-box				core promoter element around -30 of transcription start
RcMYB4	CCG030607.1	1450	1490	TATA-box				core promoter element around -30 of transcription start
RcMYB4	CCG030607.1	1451	1491	TATA-box				core promoter element around -30 of transcription start
RcMYB4	CCG030607.1	1452	1492	TATA-box				core promoter element around -30 of transcription start
RcMYB4	CCG030607.1	1488	1528	TATA-box				core promoter element around -30 of transcription start
RcMYB4	CCG030607.1	1489	1529	TATA-box				core promoter element around -30 of transcription start
RcMYB4	CCG030607.1	1490	1530	TATA-box				core promoter element around -30 of transcription start
RcMYB4	CCG030607.1	1491	1531	TATA-box				core promoter element around -30 of transcription start
RcMYB4	CCG030607.1	1622	1662	TATA-box				core promoter element around -30 of transcription start
RcMYB4	CCG030607.1	1623	1663	TATA-box				core promoter element around -30 of transcription start
RcMYB4	CCG030607.1	1929	1969	TATA-box				core promoter element around -30 of transcription start
RcMYB4	CCG030607.1	1931	1971	TATA-box				core promoter element around -30 of transcription start
RcMYB4	CCG030607.1	1932	1972	TATA-box				core promoter element around -30 of transcription start
RcMYB4	CCG030607.1	1933	1973	TATA-box				core promoter element around -30 of transcription start
RcMYB4	CCG030607.1	845	885	CAAT-box				common cis-acting element in promoter and enhancer regions
RcMYB4	CCG030607.1	858	898	CAAT-box				common cis-acting element in promoter and enhancer regions
RcMYB4	CCG030607.1	1041	1081	CAAT-box				common cis-acting element in promoter and enhancer regions
RcMYB4	CCG030607.1	1100	1140	CAAT-box				common cis-acting element in promoter and enhancer regions
RcMYB4	CCG030607.1	1455	1495	CAAT-box				common cis-acting element in promoter and enhancer regions
RcMYB4	CCG030607.1	1580	1620	CAAT-box				common cis-acting element in promoter and enhancer regions
RcMYB4	CCG030607.1	1759	1799	CAAT-box				common cis-acting element in promoter and enhancer regions
RcMYB4	CCG030607.1	1046	1086	TGA-element				auxin-responsive element
RcMYB4	CCG030607.1	1720	1760	LTR				cis-acting element involved in low-temperature responsiveness
RcMYB4	CCG030607.1	1022	1062	CCAAT-box				MYBHv1 binding site
RcMYB4	CCG030607.1	610	650	Box 4				part of a conserved DNA module involved in light responsiveness
RcMYB4	CCG030607.1	737	777	Box 4				part of a conserved DNA module involved in light responsiveness
RcMYB4	CCG030607.1	803	843	Box 4				part of a conserved DNA module involved in light responsiveness
RcMYB4	CCG030607.1	1092	1132	ARE				cis-acting regulatory element essential for the anaerobic induction
RcMYB4	CCG030607.1	1381	1421	TCCC-motif				part of a light responsive element
RcMYB4	CCG030607.1	1314	1354	GATA-motif				part of a light responsive element
RcMYB4	CCG030607.1	1854	1894	G-box				cis-acting regulatory element involved in light responsiveness
RcMYB4	CCG030607.1	1856	1896	G-box				cis-acting regulatory element involved in light responsiveness
RcMYB4	CCG030607.1	1857	1897	G-box				cis-acting regulatory element involved in light responsiveness
RcMYB4	CCG030607.1	1855	1895	ABRE				cis-acting element involved in the abscisic acid responsiveness
RcMYB4	CCG030607.1	1857	1897	ABRE				cis-acting element involved in the abscisic acid responsiveness
RcMYB4	CCG030607.1	1858	1898	ABRE				cis-acting element involved in the abscisic acid responsiveness
RcMYB4	CCG030607.1	1857	1897	G-Box				cis-acting regulatory element involved in light responsiveness
RcMYB5	CCG031272.1	601	641	TGACG-motif				cis-acting regulatory element involved in the MeJA-responsiveness
RcMYB5	CCG031272.1	604	644	TGACG-motif				cis-acting regulatory element involved in the MeJA-responsiveness
RcMYB5	CCG031272.1	794	834	TGACG-motif				cis-acting regulatory element involved in the MeJA-responsiveness
RcMYB5	CCG031272.1	855	895	Box 4				part of a conserved DNA module involved in light responsiveness
RcMYB5	CCG031272.1	1348	1388	Box 4				part of a conserved DNA module involved in light responsiveness
RcMYB5	CCG031272.1	1715	1755	Box 4				part of a conserved DNA module involved in light responsiveness
RcMYB5	CCG031272.1	1759	1799	Box 4				part of a conserved DNA module involved in light responsiveness
RcMYB5	CCG031272.1	1787	1827	Box 4				part of a conserved DNA module involved in light responsiveness
RcMYB5	CCG031272.1	572	612	MRE				MYB binding site involved in light responsiveness
RcMYB5	CCG031272.1	1086	1126	MRE				MYB binding site involved in light responsiveness
RcMYB5	CCG031272.1	214	254	AE-box				part of a module for light response
RcMYB5	CCG031272.1	1013	1053	AE-box				part of a module for light response
RcMYB5	CCG031272.1	1135	1175	I-box				part of a light responsive element
RcMYB5	CCG031272.1	310	350	TGA-element				auxin-responsive element
RcMYB5	CCG031272.1	80	120	CAAT-box				common cis-acting element in promoter and enhancer regions
RcMYB5	CCG031272.1	143	183	CAAT-box				common cis-acting element in promoter and enhancer regions
RcMYB5	CCG031272.1	180	220	CAAT-box				common cis-acting element in promoter and enhancer regions
RcMYB5	CCG031272.1	287	327	CAAT-box				common cis-acting element in promoter and enhancer regions
RcMYB5	CCG031272.1	354	394	CAAT-box				common cis-acting element in promoter and enhancer regions
RcMYB5	CCG031272.1	405	445	CAAT-box				common cis-acting element in promoter and enhancer regions
RcMYB5	CCG031272.1	588	628	CAAT-box				common cis-acting element in promoter and enhancer regions
RcMYB5	CCG031272.1	668	708	CAAT-box				common cis-acting element in promoter and enhancer regions
RcMYB5	CCG031272.1	988	1028	CAAT-box				common cis-acting element in promoter and enhancer regions
RcMYB5	CCG031272.1	1337	1377	CAAT-box				common cis-acting element in promoter and enhancer regions
RcMYB5	CCG031272.1	1430	1470	CAAT-box				common cis-acting element in promoter and enhancer regions
RcMYB5	CCG031272.1	1501	1541	CAAT-box				common cis-acting element in promoter and enhancer regions
RcMYB5	CCG031272.1	1504	1544	CAAT-box				common cis-acting element in promoter and enhancer regions
RcMYB5	CCG031272.1	1613	1653	CAAT-box				common cis-acting element in promoter and enhancer regions
RcMYB5	CCG031272.1	1751	1791	CAAT-box				common cis-acting element in promoter and enhancer regions
RcMYB5	CCG031272.1	153	193	TATA-box				core promoter element around -30 of transcription start
RcMYB5	CCG031272.1	154	194	TATA-box				core promoter element around -30 of transcription start
RcMYB5	CCG031272.1	155	195	TATA-box				core promoter element around -30 of transcription start
RcMYB5	CCG031272.1	156	196	TATA-box				core promoter element around -30 of transcription start
RcMYB5	CCG031272.1	577	617	TATA-box				core promoter element around -30 of transcription start
RcMYB5	CCG031272.1	578	618	TATA-box				core promoter element around -30 of transcription start
RcMYB5	CCG031272.1	580	620	TATA-box				core promoter element around -30 of transcription start
RcMYB5	CCG031272.1	728	768	TATA-box				core promoter element around -30 of transcription start
RcMYB5	CCG031272.1	729	769	TATA-box				core promoter element around -30 of transcription start
RcMYB5	CCG031272.1	730	770	TATA-box				core promoter element around -30 of transcription start
RcMYB5	CCG031272.1	737	777	TATA-box				core promoter element around -30 of transcription start
RcMYB5	CCG031272.1	738	778	TATA-box				core promoter element around -30 of transcription start
RcMYB5	CCG031272.1	777	817	TATA-box				core promoter element around -30 of transcription start
RcMYB5	CCG031272.1	778	818	TATA-box				core promoter element around -30 of transcription start
RcMYB5	CCG031272.1	779	819	TATA-box				core promoter element around -30 of transcription start
RcMYB5	CCG031272.1	780	820	TATA-box				core promoter element around -30 of transcription start
RcMYB5	CCG031272.1	848	888	TATA-box				core promoter element around -30 of transcription start
RcMYB5	CCG031272.1	849	889	TATA-box				core promoter element around -30 of transcription start
RcMYB5	CCG031272.1	918	958	TATA-box				core promoter element around -30 of transcription start
RcMYB5	CCG031272.1	919	959	TATA-box				core promoter element around -30 of transcription start
RcMYB5	CCG031272.1	973	1013	TATA-box				core promoter element around -30 of transcription start
RcMYB5	CCG031272.1	974	1014	TATA-box				core promoter element around -30 of transcription start
RcMYB5	CCG031272.1	1109	1149	TATA-box				core promoter element around -30 of transcription start
RcMYB5	CCG031272.1	1111	1151	TATA-box				core promoter element around -30 of transcription start
RcMYB5	CCG031272.1	1257	1297	TATA-box				core promoter element around -30 of transcription start
RcMYB5	CCG031272.1	1258	1298	TATA-box				core promoter element around -30 of transcription start
RcMYB5	CCG031272.1	1259	1299	TATA-box				core promoter element around -30 of transcription start
RcMYB5	CCG031272.1	1260	1300	TATA-box				core promoter element around -30 of transcription start
RcMYB5	CCG031272.1	1261	1301	TATA-box				core promoter element around -30 of transcription start
RcMYB5	CCG031272.1	1262	1302	TATA-box				core promoter element around -30 of transcription start
RcMYB5	CCG031272.1	1263	1303	TATA-box				core promoter element around -30 of transcription start
RcMYB5	CCG031272.1	1264	1304	TATA-box				core promoter element around -30 of transcription start
RcMYB5	CCG031272.1	1265	1305	TATA-box				core promoter element around -30 of transcription start
RcMYB5	CCG031272.1	1266	1306	TATA-box				core promoter element around -30 of transcription start
RcMYB5	CCG031272.1	1352	1392	TATA-box				core promoter element around -30 of transcription start
RcMYB5	CCG031272.1	1353	1393	TATA-box				core promoter element around -30 of transcription start
RcMYB5	CCG031272.1	1354	1394	TATA-box				core promoter element around -30 of transcription start
RcMYB5	CCG031272.1	1355	1395	TATA-box				core promoter element around -30 of transcription start
RcMYB5	CCG031272.1	1359	1399	TATA-box				core promoter element around -30 of transcription start
RcMYB5	CCG031272.1	1360	1400	TATA-box				core promoter element around -30 of transcription start
RcMYB5	CCG031272.1	1361	1401	TATA-box				core promoter element around -30 of transcription start
RcMYB5	CCG031272.1	1362	1402	TATA-box				core promoter element around -30 of transcription start
RcMYB5	CCG031272.1	1363	1403	TATA-box				core promoter element around -30 of transcription start
RcMYB5	CCG031272.1	1364	1404	TATA-box				core promoter element around -30 of transcription start
RcMYB5	CCG031272.1	1661	1701	TATA-box				core promoter element around -30 of transcription start
RcMYB5	CCG031272.1	1662	1702	TATA-box				core promoter element around -30 of transcription start
RcMYB5	CCG031272.1	1895	1935	TATA-box				core promoter element around -30 of transcription start
RcMYB5	CCG031272.1	1669	1709	TCT-motif				part of a light responsive element
RcMYB5	CCG031272.1	1020	1060	TCA-element				cis-acting element involved in salicylic acid responsiveness
RcMYB5	CCG031272.1	1555	1595	G-Box				cis-acting regulatory element involved in light responsiveness
RcMYB5	CCG031272.1	650	690	ABRE				cis-acting element involved in the abscisic acid responsiveness
RcMYB5	CCG031272.1	659	699	ABRE				cis-acting element involved in the abscisic acid responsiveness
RcMYB5	CCG031272.1	1553	1593	ABRE				cis-acting element involved in the abscisic acid responsiveness
RcMYB5	CCG031272.1	1555	1595	ABRE				cis-acting element involved in the abscisic acid responsiveness
RcMYB5	CCG031272.1	1556	1596	ABRE				cis-acting element involved in the abscisic acid responsiveness
RcMYB5	CCG031272.1	1641	1681	MBS				MYB binding site involved in drought-inducibility
RcMYB5	CCG031272.1	659	699	G-box				cis-acting regulatory element involved in light responsiveness
RcMYB5	CCG031272.1	1550	1590	G-box				cis-acting regulatory element involved in light responsiveness
RcMYB5	CCG031272.1	1554	1594	G-box				cis-acting regulatory element involved in light responsiveness
RcMYB5	CCG031272.1	1555	1595	G-box				cis-acting regulatory element involved in light responsiveness
RcMYB5	CCG031272.1	601	641	CGTCA-motif				cis-acting regulatory element involved in the MeJA-responsiveness
RcMYB5	CCG031272.1	604	644	CGTCA-motif				cis-acting regulatory element involved in the MeJA-responsiveness
RcMYB5	CCG031272.1	794	834	CGTCA-motif				cis-acting regulatory element involved in the MeJA-responsiveness
RcMYB5	CCG031272.1	472	512	GCN4_motif				cis-regulatory element involved in endosperm expression
RcMYB5	CCG031272.1	1327	1367	GCN4_motif				cis-regulatory element involved in endosperm expression
RcMYB6	CCG030151.1	818	858	G-box				cis-acting regulatory element involved in light responsiveness
RcMYB6	CCG030151.1	1794	1834	G-box				cis-acting regulatory element involved in light responsiveness
RcMYB6	CCG030151.1	1798	1838	G-box				cis-acting regulatory element involved in light responsiveness
RcMYB6	CCG030151.1	1799	1839	G-box				cis-acting regulatory element involved in light responsiveness
RcMYB6	CCG030151.1	1004	1044	ARE				cis-acting regulatory element essential for the anaerobic induction
RcMYB6	CCG030151.1	100	140	MBS				MYB binding site involved in drought-inducibility
RcMYB6	CCG030151.1	907	947	I-box				part of a light responsive element
RcMYB6	CCG030151.1	937	977	I-box				part of a light responsive element
RcMYB6	CCG030151.1	12	52	GT1-motif				light responsive element
RcMYB6	CCG030151.1	312	352	GT1-motif				light responsive element
RcMYB6	CCG030151.1	583	623	LTR				cis-acting element involved in low-temperature responsiveness
RcMYB6	CCG030151.1	1904	1944	LTR				cis-acting element involved in low-temperature responsiveness
RcMYB6	CCG030151.1	355	395	TCCC-motif				part of a light responsive element
RcMYB6	CCG030151.1	745	785	TCCC-motif				part of a light responsive element
RcMYB6	CCG030151.1	1660	1700	GATA-motif				part of a light responsive element
RcMYB6	CCG030151.1	60	100	CGTCA-motif				cis-acting regulatory element involved in the MeJA-responsiveness
RcMYB6	CCG030151.1	776	816	CGTCA-motif				cis-acting regulatory element involved in the MeJA-responsiveness
RcMYB6	CCG030151.1	1873	1913	CGTCA-motif				cis-acting regulatory element involved in the MeJA-responsiveness
RcMYB6	CCG030151.1	1439	1479	G-Box				cis-acting regulatory element involved in light responsiveness
RcMYB6	CCG030151.1	1799	1839	G-Box				cis-acting regulatory element involved in light responsiveness
RcMYB6	CCG030151.1	177	217	O2-site				cis-acting regulatory element involved in zein metabolism regulation
RcMYB6	CCG030151.1	1312	1352	TCA-element				cis-acting element involved in salicylic acid responsiveness
RcMYB6	CCG030151.1	819	859	ABRE				cis-acting element involved in the abscisic acid responsiveness
RcMYB6	CCG030151.1	1440	1480	ABRE				cis-acting element involved in the abscisic acid responsiveness
RcMYB6	CCG030151.1	1797	1837	ABRE				cis-acting element involved in the abscisic acid responsiveness
RcMYB6	CCG030151.1	1799	1839	ABRE				cis-acting element involved in the abscisic acid responsiveness
RcMYB6	CCG030151.1	1800	1840	ABRE				cis-acting element involved in the abscisic acid responsiveness
RcMYB6	CCG030151.1	132	172	TGA-element				auxin-responsive element
RcMYB6	CCG030151.1	1276	1316	TGA-element				auxin-responsive element
RcMYB6	CCG030151.1	4	44	TATA-box				core promoter element around -30 of transcription start
RcMYB6	CCG030151.1	28	68	TATA-box				core promoter element around -30 of transcription start
RcMYB6	CCG030151.1	29	69	TATA-box				core promoter element around -30 of transcription start
RcMYB6	CCG030151.1	74	114	TATA-box				core promoter element around -30 of transcription start
RcMYB6	CCG030151.1	816	856	TATA-box				core promoter element around -30 of transcription start
RcMYB6	CCG030151.1	842	882	TATA-box				core promoter element around -30 of transcription start
RcMYB6	CCG030151.1	843	883	TATA-box				core promoter element around -30 of transcription start
RcMYB6	CCG030151.1	845	885	TATA-box				core promoter element around -30 of transcription start
RcMYB6	CCG030151.1	908	948	TATA-box				core promoter element around -30 of transcription start
RcMYB6	CCG030151.1	938	978	TATA-box				core promoter element around -30 of transcription start
RcMYB6	CCG030151.1	1046	1086	TATA-box				core promoter element around -30 of transcription start
RcMYB6	CCG030151.1	1047	1087	TATA-box				core promoter element around -30 of transcription start
RcMYB6	CCG030151.1	1362	1402	TATA-box				core promoter element around -30 of transcription start
RcMYB6	CCG030151.1	1364	1404	TATA-box				core promoter element around -30 of transcription start
RcMYB6	CCG030151.1	1430	1470	TATA-box				core promoter element around -30 of transcription start
RcMYB6	CCG030151.1	1431	1471	TATA-box				core promoter element around -30 of transcription start
RcMYB6	CCG030151.1	1467	1507	TATA-box				core promoter element around -30 of transcription start
RcMYB6	CCG030151.1	1522	1562	TATA-box				core promoter element around -30 of transcription start
RcMYB6	CCG030151.1	1693	1733	TATA-box				core promoter element around -30 of transcription start
RcMYB6	CCG030151.1	1694	1734	TATA-box				core promoter element around -30 of transcription start
RcMYB6	CCG030151.1	1739	1779	TATA-box				core promoter element around -30 of transcription start
RcMYB6	CCG030151.1	1741	1781	TATA-box				core promoter element around -30 of transcription start
RcMYB6	CCG030151.1	1894	1934	TATA-box				core promoter element around -30 of transcription start
RcMYB6	CCG030151.1	1895	1935	TATA-box				core promoter element around -30 of transcription start
RcMYB6	CCG030151.1	1896	1936	TATA-box				core promoter element around -30 of transcription start
RcMYB6	CCG030151.1	1897	1937	TATA-box				core promoter element around -30 of transcription start
RcMYB6	CCG030151.1	1898	1938	TATA-box				core promoter element around -30 of transcription start
RcMYB6	CCG030151.1	-15	25	CAAT-box				common cis-acting element in promoter and enhancer regions
RcMYB6	CCG030151.1	146	186	CAAT-box				common cis-acting element in promoter and enhancer regions
RcMYB6	CCG030151.1	388	428	CAAT-box				common cis-acting element in promoter and enhancer regions
RcMYB6	CCG030151.1	967	1007	CAAT-box				common cis-acting element in promoter and enhancer regions
RcMYB6	CCG030151.1	1014	1054	CAAT-box				common cis-acting element in promoter and enhancer regions
RcMYB6	CCG030151.1	1101	1141	CAAT-box				common cis-acting element in promoter and enhancer regions
RcMYB6	CCG030151.1	1124	1164	CAAT-box				common cis-acting element in promoter and enhancer regions
RcMYB6	CCG030151.1	1258	1298	CAAT-box				common cis-acting element in promoter and enhancer regions
RcMYB6	CCG030151.1	1717	1757	CAAT-box				common cis-acting element in promoter and enhancer regions
RcMYB6	CCG030151.1	60	100	TGACG-motif				cis-acting regulatory element involved in the MeJA-responsiveness
RcMYB6	CCG030151.1	776	816	TGACG-motif				cis-acting regulatory element involved in the MeJA-responsiveness
RcMYB6	CCG030151.1	1873	1913	TGACG-motif				cis-acting regulatory element involved in the MeJA-responsiveness
RcMYB6	CCG030151.1	988	1028	CCAAT-box				MYBHv1 binding site
RcMYB7	CCG017469.1	620	660	LTR				cis-acting element involved in low-temperature responsiveness
RcMYB7	CCG017469.1	1365	1405	Box 4				part of a conserved DNA module involved in light responsiveness
RcMYB7	CCG017469.1	1490	1530	Box 4				part of a conserved DNA module involved in light responsiveness
RcMYB7	CCG017469.1	1564	1604	Box 4				part of a conserved DNA module involved in light responsiveness
RcMYB7	CCG017469.1	1760	1800	Box 4				part of a conserved DNA module involved in light responsiveness
RcMYB7	CCG017469.1	38	78	TATA-box				core promoter element around -30 of transcription start
RcMYB7	CCG017469.1	40	80	TATA-box				core promoter element around -30 of transcription start
RcMYB7	CCG017469.1	280	320	TATA-box				core promoter element around -30 of transcription start
RcMYB7	CCG017469.1	281	321	TATA-box				core promoter element around -30 of transcription start
RcMYB7	CCG017469.1	340	380	TATA-box				core promoter element around -30 of transcription start
RcMYB7	CCG017469.1	342	382	TATA-box				core promoter element around -30 of transcription start
RcMYB7	CCG017469.1	469	509	TATA-box				core promoter element around -30 of transcription start
RcMYB7	CCG017469.1	470	510	TATA-box				core promoter element around -30 of transcription start
RcMYB7	CCG017469.1	471	511	TATA-box				core promoter element around -30 of transcription start
RcMYB7	CCG017469.1	472	512	TATA-box				core promoter element around -30 of transcription start
RcMYB7	CCG017469.1	820	860	TATA-box				core promoter element around -30 of transcription start
RcMYB7	CCG017469.1	1184	1224	TATA-box				core promoter element around -30 of transcription start
RcMYB7	CCG017469.1	1185	1225	TATA-box				core promoter element around -30 of transcription start
RcMYB7	CCG017469.1	1186	1226	TATA-box				core promoter element around -30 of transcription start
RcMYB7	CCG017469.1	1187	1227	TATA-box				core promoter element around -30 of transcription start
RcMYB7	CCG017469.1	1188	1228	TATA-box				core promoter element around -30 of transcription start
RcMYB7	CCG017469.1	1558	1598	TATA-box				core promoter element around -30 of transcription start
RcMYB7	CCG017469.1	1559	1599	TATA-box				core promoter element around -30 of transcription start
RcMYB7	CCG017469.1	1560	1600	TATA-box				core promoter element around -30 of transcription start
RcMYB7	CCG017469.1	1561	1601	TATA-box				core promoter element around -30 of transcription start
RcMYB7	CCG017469.1	1696	1736	TATA-box				core promoter element around -30 of transcription start
RcMYB7	CCG017469.1	1697	1737	TATA-box				core promoter element around -30 of transcription start
RcMYB7	CCG017469.1	1895	1935	TATA-box				core promoter element around -30 of transcription start
RcMYB7	CCG017469.1	1896	1936	TATA-box				core promoter element around -30 of transcription start
RcMYB7	CCG017469.1	1897	1937	TATA-box				core promoter element around -30 of transcription start
RcMYB7	CCG017469.1	1898	1938	TATA-box				core promoter element around -30 of transcription start
RcMYB7	CCG017469.1	1913	1953	TATA-box				core promoter element around -30 of transcription start
RcMYB7	CCG017469.1	1914	1954	TATA-box				core promoter element around -30 of transcription start
RcMYB7	CCG017469.1	212	252	TCT-motif				part of a light responsive element
RcMYB7	CCG017469.1	966	1006	TCT-motif				part of a light responsive element
RcMYB7	CCG017469.1	169	209	CAAT-box				common cis-acting element in promoter and enhancer regions
RcMYB7	CCG017469.1	300	340	CAAT-box				common cis-acting element in promoter and enhancer regions
RcMYB7	CCG017469.1	313	353	CAAT-box				common cis-acting element in promoter and enhancer regions
RcMYB7	CCG017469.1	325	365	CAAT-box				common cis-acting element in promoter and enhancer regions
RcMYB7	CCG017469.1	359	399	CAAT-box				common cis-acting element in promoter and enhancer regions
RcMYB7	CCG017469.1	465	505	CAAT-box				common cis-acting element in promoter and enhancer regions
RcMYB7	CCG017469.1	490	530	CAAT-box				common cis-acting element in promoter and enhancer regions
RcMYB7	CCG017469.1	503	543	CAAT-box				common cis-acting element in promoter and enhancer regions
RcMYB7	CCG017469.1	692	732	CAAT-box				common cis-acting element in promoter and enhancer regions
RcMYB7	CCG017469.1	832	872	CAAT-box				common cis-acting element in promoter and enhancer regions
RcMYB7	CCG017469.1	1021	1061	CAAT-box				common cis-acting element in promoter and enhancer regions
RcMYB7	CCG017469.1	1179	1219	CAAT-box				common cis-acting element in promoter and enhancer regions
RcMYB7	CCG017469.1	1222	1262	CAAT-box				common cis-acting element in promoter and enhancer regions
RcMYB7	CCG017469.1	1447	1487	CAAT-box				common cis-acting element in promoter and enhancer regions
RcMYB7	CCG017469.1	1653	1693	CAAT-box				common cis-acting element in promoter and enhancer regions
RcMYB7	CCG017469.1	1797	1837	CAAT-box				common cis-acting element in promoter and enhancer regions
RcMYB7	CCG017469.1	1111	1151	GT1-motif				light responsive element
RcMYB7	CCG017469.1	1112	1152	GT1-motif				light responsive element
RcMYB7	CCG017469.1	1950	1990	GT1-motif				light responsive element
RcMYB7	CCG017469.1	74	114	AE-box				part of a module for light response
RcMYB7	CCG017469.1	1453	1493	I-box				part of a light responsive element
RcMYB7	CCG017469.1	-2	38	MBS				MYB binding site involved in drought-inducibility
RcMYB7	CCG017469.1	796	836	MBS				MYB binding site involved in drought-inducibility
RcMYB7	CCG017469.1	1421	1461	MBS				MYB binding site involved in drought-inducibility
RcMYB7	CCG017469.1	104	144	ABRE				cis-acting element involved in the abscisic acid responsiveness
RcMYB7	CCG017469.1	850	890	ABRE				cis-acting element involved in the abscisic acid responsiveness
RcMYB7	CCG017469.1	454	494	TCA-element				cis-acting element involved in salicylic acid responsiveness
RcMYB7	CCG017469.1	1515	1555	TCA-element				cis-acting element involved in salicylic acid responsiveness
RcMYB7	CCG017469.1	962	1002	TC-rich repeats				cis-acting element involved in defense and stress responsiveness
RcMYB7	CCG017469.1	638	678	ARE				cis-acting regulatory element essential for the anaerobic induction
RcMYB7	CCG017469.1	1276	1316	ARE				cis-acting regulatory element essential for the anaerobic induction
RcMYB7	CCG017469.1	1331	1371	ARE				cis-acting regulatory element essential for the anaerobic induction
RcMYB7	CCG017469.1	1417	1457	ARE				cis-acting regulatory element essential for the anaerobic induction
RcMYB7	CCG017469.1	1523	1563	ARE				cis-acting regulatory element essential for the anaerobic induction
RcMYB7	CCG017469.1	1535	1575	ARE				cis-acting regulatory element essential for the anaerobic induction
RcMYB7	CCG017469.1	104	144	G-box				cis-acting regulatory element involved in light responsiveness
RcMYB8	CCG004613.1	981	1021	CAT-box				cis-acting regulatory element related to meristem expression
RcMYB8	CCG004613.1	79	119	Box 4				part of a conserved DNA module involved in light responsiveness
RcMYB8	CCG004613.1	232	272	Box 4				part of a conserved DNA module involved in light responsiveness
RcMYB8	CCG004613.1	737	777	Box 4				part of a conserved DNA module involved in light responsiveness
RcMYB8	CCG004613.1	824	864	Box 4				part of a conserved DNA module involved in light responsiveness
RcMYB8	CCG004613.1	568	608	TGACG-motif				cis-acting regulatory element involved in the MeJA-responsiveness
RcMYB8	CCG004613.1	1198	1238	TGACG-motif				cis-acting regulatory element involved in the MeJA-responsiveness
RcMYB8	CCG004613.1	195	235	I-box				part of a light responsive element
RcMYB8	CCG004613.1	1734	1774	I-box				part of a light responsive element
RcMYB8	CCG004613.1	1762	1802	I-box				part of a light responsive element
RcMYB8	CCG004613.1	1501	1541	TGA-element				auxin-responsive element
RcMYB8	CCG004613.1	1609	1649	TGA-element				auxin-responsive element
RcMYB8	CCG004613.1	539	579	P-box				gibberellin-responsive element
RcMYB8	CCG004613.1	1193	1233	P-box				gibberellin-responsive element
RcMYB8	CCG004613.1	1814	1854	P-box				gibberellin-responsive element
RcMYB8	CCG004613.1	257	297	CAAT-box				common cis-acting element in promoter and enhancer regions
RcMYB8	CCG004613.1	291	331	CAAT-box				common cis-acting element in promoter and enhancer regions
RcMYB8	CCG004613.1	292	332	CAAT-box				common cis-acting element in promoter and enhancer regions
RcMYB8	CCG004613.1	450	490	CAAT-box				common cis-acting element in promoter and enhancer regions
RcMYB8	CCG004613.1	461	501	CAAT-box				common cis-acting element in promoter and enhancer regions
RcMYB8	CCG004613.1	511	551	CAAT-box				common cis-acting element in promoter and enhancer regions
RcMYB8	CCG004613.1	821	861	CAAT-box				common cis-acting element in promoter and enhancer regions
RcMYB8	CCG004613.1	833	873	CAAT-box				common cis-acting element in promoter and enhancer regions
RcMYB8	CCG004613.1	1296	1336	CAAT-box				common cis-acting element in promoter and enhancer regions
RcMYB8	CCG004613.1	1299	1339	CAAT-box				common cis-acting element in promoter and enhancer regions
RcMYB8	CCG004613.1	1729	1769	CAAT-box				common cis-acting element in promoter and enhancer regions
RcMYB8	CCG004613.1	1746	1786	CAAT-box				common cis-acting element in promoter and enhancer regions
RcMYB8	CCG004613.1	1955	1995	CAAT-box				common cis-acting element in promoter and enhancer regions
RcMYB8	CCG004613.1	1934	1974	GT1-motif				light responsive element
RcMYB8	CCG004613.1	1935	1975	GT1-motif				light responsive element
RcMYB8	CCG004613.1	278	318	TATA-box				core promoter element around -30 of transcription start
RcMYB8	CCG004613.1	427	467	TATA-box				core promoter element around -30 of transcription start
RcMYB8	CCG004613.1	428	468	TATA-box				core promoter element around -30 of transcription start
RcMYB8	CCG004613.1	430	470	TATA-box				core promoter element around -30 of transcription start
RcMYB8	CCG004613.1	674	714	TATA-box				core promoter element around -30 of transcription start
RcMYB8	CCG004613.1	675	715	TATA-box				core promoter element around -30 of transcription start
RcMYB8	CCG004613.1	676	716	TATA-box				core promoter element around -30 of transcription start
RcMYB8	CCG004613.1	677	717	TATA-box				core promoter element around -30 of transcription start
RcMYB8	CCG004613.1	697	737	TATA-box				core promoter element around -30 of transcription start
RcMYB8	CCG004613.1	713	753	TATA-box				core promoter element around -30 of transcription start
RcMYB8	CCG004613.1	715	755	TATA-box				core promoter element around -30 of transcription start
RcMYB8	CCG004613.1	742	782	TATA-box				core promoter element around -30 of transcription start
RcMYB8	CCG004613.1	865	905	TATA-box				core promoter element around -30 of transcription start
RcMYB8	CCG004613.1	867	907	TATA-box				core promoter element around -30 of transcription start
RcMYB8	CCG004613.1	874	914	TATA-box				core promoter element around -30 of transcription start
RcMYB8	CCG004613.1	875	915	TATA-box				core promoter element around -30 of transcription start
RcMYB8	CCG004613.1	876	916	TATA-box				core promoter element around -30 of transcription start
RcMYB8	CCG004613.1	877	917	TATA-box				core promoter element around -30 of transcription start
RcMYB8	CCG004613.1	1261	1301	TATA-box				core promoter element around -30 of transcription start
RcMYB8	CCG004613.1	1262	1302	TATA-box				core promoter element around -30 of transcription start
RcMYB8	CCG004613.1	1263	1303	TATA-box				core promoter element around -30 of transcription start
RcMYB8	CCG004613.1	1479	1519	TATA-box				core promoter element around -30 of transcription start
RcMYB8	CCG004613.1	1480	1520	TATA-box				core promoter element around -30 of transcription start
RcMYB8	CCG004613.1	1489	1529	TATA-box				core promoter element around -30 of transcription start
RcMYB8	CCG004613.1	1490	1530	TATA-box				core promoter element around -30 of transcription start
RcMYB8	CCG004613.1	1491	1531	TATA-box				core promoter element around -30 of transcription start
RcMYB8	CCG004613.1	1799	1839	TATA-box				core promoter element around -30 of transcription start
RcMYB8	CCG004613.1	1800	1840	TATA-box				core promoter element around -30 of transcription start
RcMYB8	CCG004613.1	1824	1864	TATA-box				core promoter element around -30 of transcription start
RcMYB8	CCG004613.1	1825	1865	TATA-box				core promoter element around -30 of transcription start
RcMYB8	CCG004613.1	1826	1866	TATA-box				core promoter element around -30 of transcription start
RcMYB8	CCG004613.1	335	375	G-Box				cis-acting regulatory element involved in light responsiveness
RcMYB8	CCG004613.1	333	373	ABRE				cis-acting element involved in the abscisic acid responsiveness
RcMYB8	CCG004613.1	335	375	ABRE				cis-acting element involved in the abscisic acid responsiveness
RcMYB8	CCG004613.1	336	376	ABRE				cis-acting element involved in the abscisic acid responsiveness
RcMYB8	CCG004613.1	770	810	ABRE				cis-acting element involved in the abscisic acid responsiveness
RcMYB8	CCG004613.1	330	370	G-box				cis-acting regulatory element involved in light responsiveness
RcMYB8	CCG004613.1	334	374	G-box				cis-acting regulatory element involved in light responsiveness
RcMYB8	CCG004613.1	335	375	G-box				cis-acting regulatory element involved in light responsiveness
RcMYB8	CCG004613.1	769	809	G-box				cis-acting regulatory element involved in light responsiveness
RcMYB8	CCG004613.1	1971	2011	G-box				cis-acting regulatory element involved in light responsiveness
RcMYB8	CCG004613.1	568	608	CGTCA-motif				cis-acting regulatory element involved in the MeJA-responsiveness
RcMYB8	CCG004613.1	1198	1238	CGTCA-motif				cis-acting regulatory element involved in the MeJA-responsiveness
RcMYB8	CCG004613.1	905	945	TCCC-motif				part of a light responsive element
RcMYB8	CCG004613.1	482	522	TC-rich repeats				cis-acting element involved in defense and stress responsiveness
RcMYB8	CCG004613.1	846	886	GCN4_motif				cis-regulatory element involved in endosperm expression
RcMYB8	CCG004613.1	802	842	ARE				cis-acting regulatory element essential for the anaerobic induction
RcMYB9	CCG028775.1	56	96	CAAT-box				common cis-acting element in promoter and enhancer regions
RcMYB9	CCG028775.1	217	257	CAAT-box				common cis-acting element in promoter and enhancer regions
RcMYB9	CCG028775.1	347	387	CAAT-box				common cis-acting element in promoter and enhancer regions
RcMYB9	CCG028775.1	369	409	CAAT-box				common cis-acting element in promoter and enhancer regions
RcMYB9	CCG028775.1	530	570	CAAT-box				common cis-acting element in promoter and enhancer regions
RcMYB9	CCG028775.1	881	921	CAAT-box				common cis-acting element in promoter and enhancer regions
RcMYB9	CCG028775.1	903	943	CAAT-box				common cis-acting element in promoter and enhancer regions
RcMYB9	CCG028775.1	1310	1350	CAAT-box				common cis-acting element in promoter and enhancer regions
RcMYB9	CCG028775.1	1345	1385	CAAT-box				common cis-acting element in promoter and enhancer regions
RcMYB9	CCG028775.1	1368	1408	CAAT-box				common cis-acting element in promoter and enhancer regions
RcMYB9	CCG028775.1	1483	1523	CAAT-box				common cis-acting element in promoter and enhancer regions
RcMYB9	CCG028775.1	1606	1646	CAAT-box				common cis-acting element in promoter and enhancer regions
RcMYB9	CCG028775.1	1646	1686	CAAT-box				common cis-acting element in promoter and enhancer regions
RcMYB9	CCG028775.1	1668	1708	CAAT-box				common cis-acting element in promoter and enhancer regions
RcMYB9	CCG028775.1	1671	1711	CAAT-box				common cis-acting element in promoter and enhancer regions
RcMYB9	CCG028775.1	1902	1942	CAAT-box				common cis-acting element in promoter and enhancer regions
RcMYB9	CCG028775.1	1164	1204	GT1-motif				light responsive element
RcMYB9	CCG028775.1	925	965	TCT-motif				part of a light responsive element
RcMYB9	CCG028775.1	230	270	TATA-box				core promoter element around -30 of transcription start
RcMYB9	CCG028775.1	231	271	TATA-box				core promoter element around -30 of transcription start
RcMYB9	CCG028775.1	232	272	TATA-box				core promoter element around -30 of transcription start
RcMYB9	CCG028775.1	233	273	TATA-box				core promoter element around -30 of transcription start
RcMYB9	CCG028775.1	249	289	TATA-box				core promoter element around -30 of transcription start
RcMYB9	CCG028775.1	250	290	TATA-box				core promoter element around -30 of transcription start
RcMYB9	CCG028775.1	251	291	TATA-box				core promoter element around -30 of transcription start
RcMYB9	CCG028775.1	354	394	TATA-box				core promoter element around -30 of transcription start
RcMYB9	CCG028775.1	380	420	TATA-box				core promoter element around -30 of transcription start
RcMYB9	CCG028775.1	438	478	TATA-box				core promoter element around -30 of transcription start
RcMYB9	CCG028775.1	527	567	TATA-box				core promoter element around -30 of transcription start
RcMYB9	CCG028775.1	559	599	TATA-box				core promoter element around -30 of transcription start
RcMYB9	CCG028775.1	561	601	TATA-box				core promoter element around -30 of transcription start
RcMYB9	CCG028775.1	562	602	TATA-box				core promoter element around -30 of transcription start
RcMYB9	CCG028775.1	563	603	TATA-box				core promoter element around -30 of transcription start
RcMYB9	CCG028775.1	591	631	TATA-box				core promoter element around -30 of transcription start
RcMYB9	CCG028775.1	592	632	TATA-box				core promoter element around -30 of transcription start
RcMYB9	CCG028775.1	677	717	TATA-box				core promoter element around -30 of transcription start
RcMYB9	CCG028775.1	678	718	TATA-box				core promoter element around -30 of transcription start
RcMYB9	CCG028775.1	679	719	TATA-box				core promoter element around -30 of transcription start
RcMYB9	CCG028775.1	688	728	TATA-box				core promoter element around -30 of transcription start
RcMYB9	CCG028775.1	689	729	TATA-box				core promoter element around -30 of transcription start
RcMYB9	CCG028775.1	982	1022	TATA-box				core promoter element around -30 of transcription start
RcMYB9	CCG028775.1	1231	1271	TATA-box				core promoter element around -30 of transcription start
RcMYB9	CCG028775.1	1356	1396	TATA-box				core promoter element around -30 of transcription start
RcMYB9	CCG028775.1	1357	1397	TATA-box				core promoter element around -30 of transcription start
RcMYB9	CCG028775.1	1434	1474	TATA-box				core promoter element around -30 of transcription start
RcMYB9	CCG028775.1	1435	1475	TATA-box				core promoter element around -30 of transcription start
RcMYB9	CCG028775.1	1436	1476	TATA-box				core promoter element around -30 of transcription start
RcMYB9	CCG028775.1	1437	1477	TATA-box				core promoter element around -30 of transcription start
RcMYB9	CCG028775.1	1438	1478	TATA-box				core promoter element around -30 of transcription start
RcMYB9	CCG028775.1	1461	1501	TATA-box				core promoter element around -30 of transcription start
RcMYB9	CCG028775.1	1465	1505	TATA-box				core promoter element around -30 of transcription start
RcMYB9	CCG028775.1	1614	1654	TATA-box				core promoter element around -30 of transcription start
RcMYB9	CCG028775.1	1615	1655	TATA-box				core promoter element around -30 of transcription start
RcMYB9	CCG028775.1	1616	1656	TATA-box				core promoter element around -30 of transcription start
RcMYB9	CCG028775.1	1617	1657	TATA-box				core promoter element around -30 of transcription start
RcMYB9	CCG028775.1	1674	1714	TATA-box				core promoter element around -30 of transcription start
RcMYB9	CCG028775.1	1676	1716	TATA-box				core promoter element around -30 of transcription start
RcMYB9	CCG028775.1	1764	1804	TATA-box				core promoter element around -30 of transcription start
RcMYB9	CCG028775.1	1765	1805	TATA-box				core promoter element around -30 of transcription start
RcMYB9	CCG028775.1	1766	1806	TATA-box				core promoter element around -30 of transcription start
RcMYB9	CCG028775.1	1767	1807	TATA-box				core promoter element around -30 of transcription start
RcMYB9	CCG028775.1	1772	1812	TATA-box				core promoter element around -30 of transcription start
RcMYB9	CCG028775.1	1773	1813	TATA-box				core promoter element around -30 of transcription start
RcMYB9	CCG028775.1	1779	1819	TATA-box				core promoter element around -30 of transcription start
RcMYB9	CCG028775.1	1780	1820	TATA-box				core promoter element around -30 of transcription start
RcMYB9	CCG028775.1	1781	1821	TATA-box				core promoter element around -30 of transcription start
RcMYB9	CCG028775.1	1804	1844	TATA-box				core promoter element around -30 of transcription start
RcMYB9	CCG028775.1	1805	1845	TATA-box				core promoter element around -30 of transcription start
RcMYB9	CCG028775.1	1806	1846	TATA-box				core promoter element around -30 of transcription start
RcMYB9	CCG028775.1	1807	1847	TATA-box				core promoter element around -30 of transcription start
RcMYB9	CCG028775.1	1837	1877	TATA-box				core promoter element around -30 of transcription start
RcMYB9	CCG028775.1	1861	1901	TATA-box				core promoter element around -30 of transcription start
RcMYB9	CCG028775.1	1869	1909	TATA-box				core promoter element around -30 of transcription start
RcMYB9	CCG028775.1	1871	1911	TATA-box				core promoter element around -30 of transcription start
RcMYB9	CCG028775.1	1889	1929	TATA-box				core promoter element around -30 of transcription start
RcMYB9	CCG028775.1	1891	1931	TATA-box				core promoter element around -30 of transcription start
RcMYB9	CCG028775.1	1790	1830	I-box				part of a light responsive element
RcMYB9	CCG028775.1	126	166	A-box				cis-acting regulatory element
RcMYB9	CCG028775.1	1428	1468	LTR				cis-acting element involved in low-temperature responsiveness
RcMYB9	CCG028775.1	1007	1047	TGACG-motif				cis-acting regulatory element involved in the MeJA-responsiveness
RcMYB9	CCG028775.1	1015	1055	TGACG-motif				cis-acting regulatory element involved in the MeJA-responsiveness
RcMYB9	CCG028775.1	1007	1047	CGTCA-motif				cis-acting regulatory element involved in the MeJA-responsiveness
RcMYB9	CCG028775.1	1015	1055	CGTCA-motif				cis-acting regulatory element involved in the MeJA-responsiveness
RcMYB9	CCG028775.1	998	1038	G-box				cis-acting regulatory element involved in light responsiveness
RcMYB9	CCG028775.1	16	56	TCCC-motif				part of a light responsive element
RcMYB9	CCG028775.1	999	1039	ABRE				cis-acting element involved in the abscisic acid responsiveness
RcMYB9	CCG028775.1	512	552	MBS				MYB binding site involved in drought-inducibility
RcMYB9	CCG028775.1	1017	1057	O2-site				cis-acting regulatory element involved in zein metabolism regulation
RcMYB9	CCG028775.1	1636	1676	O2-site				cis-acting regulatory element involved in zein metabolism regulation
RcMYB10	CCG017888.1	1348	1388	Box 4				part of a conserved DNA module involved in light responsiveness
RcMYB10	CCG017888.1	1840	1880	Box 4				part of a conserved DNA module involved in light responsiveness
RcMYB10	CCG017888.1	927	967	TGACG-motif				cis-acting regulatory element involved in the MeJA-responsiveness
RcMYB10	CCG017888.1	1292	1332	TGACG-motif				cis-acting regulatory element involved in the MeJA-responsiveness
RcMYB10	CCG017888.1	1575	1615	TGACG-motif				cis-acting regulatory element involved in the MeJA-responsiveness
RcMYB10	CCG017888.1	1899	1939	TGACG-motif				cis-acting regulatory element involved in the MeJA-responsiveness
RcMYB10	CCG017888.1	243	283	CAT-box				cis-acting regulatory element related to meristem expression
RcMYB10	CCG017888.1	84	124	LTR				cis-acting element involved in low-temperature responsiveness
RcMYB10	CCG017888.1	-19	21	TGA-element				auxin-responsive element
RcMYB10	CCG017888.1	147	187	CAAT-box				common cis-acting element in promoter and enhancer regions
RcMYB10	CCG017888.1	273	313	CAAT-box				common cis-acting element in promoter and enhancer regions
RcMYB10	CCG017888.1	276	316	CAAT-box				common cis-acting element in promoter and enhancer regions
RcMYB10	CCG017888.1	303	343	CAAT-box				common cis-acting element in promoter and enhancer regions
RcMYB10	CCG017888.1	311	351	CAAT-box				common cis-acting element in promoter and enhancer regions
RcMYB10	CCG017888.1	630	670	CAAT-box				common cis-acting element in promoter and enhancer regions
RcMYB10	CCG017888.1	678	718	CAAT-box				common cis-acting element in promoter and enhancer regions
RcMYB10	CCG017888.1	686	726	CAAT-box				common cis-acting element in promoter and enhancer regions
RcMYB10	CCG017888.1	795	835	CAAT-box				common cis-acting element in promoter and enhancer regions
RcMYB10	CCG017888.1	910	950	CAAT-box				common cis-acting element in promoter and enhancer regions
RcMYB10	CCG017888.1	1006	1046	CAAT-box				common cis-acting element in promoter and enhancer regions
RcMYB10	CCG017888.1	1080	1120	CAAT-box				common cis-acting element in promoter and enhancer regions
RcMYB10	CCG017888.1	1110	1150	CAAT-box				common cis-acting element in promoter and enhancer regions
RcMYB10	CCG017888.1	1496	1536	CAAT-box				common cis-acting element in promoter and enhancer regions
RcMYB10	CCG017888.1	1532	1572	CAAT-box				common cis-acting element in promoter and enhancer regions
RcMYB10	CCG017888.1	1655	1695	CAAT-box				common cis-acting element in promoter and enhancer regions
RcMYB10	CCG017888.1	1700	1740	CAAT-box				common cis-acting element in promoter and enhancer regions
RcMYB10	CCG017888.1	1892	1932	CAAT-box				common cis-acting element in promoter and enhancer regions
RcMYB10	CCG017888.1	47	87	TATA-box				core promoter element around -30 of transcription start
RcMYB10	CCG017888.1	48	88	TATA-box				core promoter element around -30 of transcription start
RcMYB10	CCG017888.1	49	89	TATA-box				core promoter element around -30 of transcription start
RcMYB10	CCG017888.1	50	90	TATA-box				core promoter element around -30 of transcription start
RcMYB10	CCG017888.1	51	91	TATA-box				core promoter element around -30 of transcription start
RcMYB10	CCG017888.1	509	549	TATA-box				core promoter element around -30 of transcription start
RcMYB10	CCG017888.1	618	658	TATA-box				core promoter element around -30 of transcription start
RcMYB10	CCG017888.1	619	659	TATA-box				core promoter element around -30 of transcription start
RcMYB10	CCG017888.1	620	660	TATA-box				core promoter element around -30 of transcription start
RcMYB10	CCG017888.1	813	853	TATA-box				core promoter element around -30 of transcription start
RcMYB10	CCG017888.1	814	854	TATA-box				core promoter element around -30 of transcription start
RcMYB10	CCG017888.1	815	855	TATA-box				core promoter element around -30 of transcription start
RcMYB10	CCG017888.1	826	866	TATA-box				core promoter element around -30 of transcription start
RcMYB10	CCG017888.1	827	867	TATA-box				core promoter element around -30 of transcription start
RcMYB10	CCG017888.1	905	945	TATA-box				core promoter element around -30 of transcription start
RcMYB10	CCG017888.1	1361	1401	TATA-box				core promoter element around -30 of transcription start
RcMYB10	CCG017888.1	1394	1434	TATA-box				core promoter element around -30 of transcription start
RcMYB10	CCG017888.1	1448	1488	TATA-box				core promoter element around -30 of transcription start
RcMYB10	CCG017888.1	1449	1489	TATA-box				core promoter element around -30 of transcription start
RcMYB10	CCG017888.1	1450	1490	TATA-box				core promoter element around -30 of transcription start
RcMYB10	CCG017888.1	1467	1507	TATA-box				core promoter element around -30 of transcription start
RcMYB10	CCG017888.1	1468	1508	TATA-box				core promoter element around -30 of transcription start
RcMYB10	CCG017888.1	1742	1782	TATA-box				core promoter element around -30 of transcription start
RcMYB10	CCG017888.1	1743	1783	TATA-box				core promoter element around -30 of transcription start
RcMYB10	CCG017888.1	1744	1784	TATA-box				core promoter element around -30 of transcription start
RcMYB10	CCG017888.1	1745	1785	TATA-box				core promoter element around -30 of transcription start
RcMYB10	CCG017888.1	1746	1786	TATA-box				core promoter element around -30 of transcription start
RcMYB10	CCG017888.1	1747	1787	TATA-box				core promoter element around -30 of transcription start
RcMYB10	CCG017888.1	1779	1819	TATA-box				core promoter element around -30 of transcription start
RcMYB10	CCG017888.1	1813	1853	TATA-box				core promoter element around -30 of transcription start
RcMYB10	CCG017888.1	1814	1854	TATA-box				core promoter element around -30 of transcription start
RcMYB10	CCG017888.1	1884	1924	TATA-box				core promoter element around -30 of transcription start
RcMYB10	CCG017888.1	1885	1925	TATA-box				core promoter element around -30 of transcription start
RcMYB10	CCG017888.1	1886	1926	TATA-box				core promoter element around -30 of transcription start
RcMYB10	CCG017888.1	1887	1927	TATA-box				core promoter element around -30 of transcription start
RcMYB10	CCG017888.1	1909	1949	TATA-box				core promoter element around -30 of transcription start
RcMYB10	CCG017888.1	1910	1950	TATA-box				core promoter element around -30 of transcription start
RcMYB10	CCG017888.1	1911	1951	TATA-box				core promoter element around -30 of transcription start
RcMYB10	CCG017888.1	1912	1952	TATA-box				core promoter element around -30 of transcription start
RcMYB10	CCG017888.1	1967	2007	TATA-box				core promoter element around -30 of transcription start
RcMYB10	CCG017888.1	1525	1565	TCT-motif				part of a light responsive element
RcMYB10	CCG017888.1	1165	1205	TCA-element				cis-acting element involved in salicylic acid responsiveness
RcMYB10	CCG017888.1	1737	1777	TCA-element				cis-acting element involved in salicylic acid responsiveness
RcMYB10	CCG017888.1	356	396	G-Box				cis-acting regulatory element involved in light responsiveness
RcMYB10	CCG017888.1	1578	1618	G-Box				cis-acting regulatory element involved in light responsiveness
RcMYB10	CCG017888.1	356	396	ABRE				cis-acting element involved in the abscisic acid responsiveness
RcMYB10	CCG017888.1	357	397	ABRE				cis-acting element involved in the abscisic acid responsiveness
RcMYB10	CCG017888.1	1576	1616	ABRE				cis-acting element involved in the abscisic acid responsiveness
RcMYB10	CCG017888.1	1578	1618	ABRE				cis-acting element involved in the abscisic acid responsiveness
RcMYB10	CCG017888.1	1579	1619	ABRE				cis-acting element involved in the abscisic acid responsiveness
RcMYB10	CCG017888.1	1901	1941	ABRE				cis-acting element involved in the abscisic acid responsiveness
RcMYB10	CCG017888.1	356	396	G-box				cis-acting regulatory element involved in light responsiveness
RcMYB10	CCG017888.1	736	776	G-box				cis-acting regulatory element involved in light responsiveness
RcMYB10	CCG017888.1	1578	1618	G-box				cis-acting regulatory element involved in light responsiveness
RcMYB10	CCG017888.1	1900	1940	G-box				cis-acting regulatory element involved in light responsiveness
RcMYB10	CCG017888.1	927	967	CGTCA-motif				cis-acting regulatory element involved in the MeJA-responsiveness
RcMYB10	CCG017888.1	1292	1332	CGTCA-motif				cis-acting regulatory element involved in the MeJA-responsiveness
RcMYB10	CCG017888.1	1575	1615	CGTCA-motif				cis-acting regulatory element involved in the MeJA-responsiveness
RcMYB10	CCG017888.1	1899	1939	CGTCA-motif				cis-acting regulatory element involved in the MeJA-responsiveness
RcMYB10	CCG017888.1	338	378	TCCC-motif				part of a light responsive element
RcMYB10	CCG017888.1	752	792	ARE				cis-acting regulatory element essential for the anaerobic induction
RcMYB10	CCG017888.1	893	933	ARE				cis-acting regulatory element essential for the anaerobic induction
RcMYB10	CCG017888.1	1265	1305	ARE				cis-acting regulatory element essential for the anaerobic induction
RcMYB10	CCG017888.1	1971	2011	ARE				cis-acting regulatory element essential for the anaerobic induction
RcMYB10	CCG017888.1	57	97	GCN4_motif				cis-regulatory element involved in endosperm expression
RcMYB10	CCG017888.1	591	631	TC-rich repeats				cis-acting element involved in defense and stress responsiveness
RcMYB11	CCG018518.1	277	317	ARE				cis-acting regulatory element essential for the anaerobic induction
RcMYB11	CCG018518.1	1499	1539	TC-rich repeats				cis-acting element involved in defense and stress responsiveness
RcMYB11	CCG018518.1	1857	1897	GATA-motif				part of a light responsive element
RcMYB11	CCG018518.1	1616	1656	TCCC-motif				part of a light responsive element
RcMYB11	CCG018518.1	45	85	G-box				cis-acting regulatory element involved in light responsiveness
RcMYB11	CCG018518.1	1568	1608	G-box				cis-acting regulatory element involved in light responsiveness
RcMYB11	CCG018518.1	45	85	ABRE				cis-acting element involved in the abscisic acid responsiveness
RcMYB11	CCG018518.1	74	114	TATA-box				core promoter element around -30 of transcription start
RcMYB11	CCG018518.1	78	118	TATA-box				core promoter element around -30 of transcription start
RcMYB11	CCG018518.1	187	227	TATA-box				core promoter element around -30 of transcription start
RcMYB11	CCG018518.1	188	228	TATA-box				core promoter element around -30 of transcription start
RcMYB11	CCG018518.1	189	229	TATA-box				core promoter element around -30 of transcription start
RcMYB11	CCG018518.1	453	493	TATA-box				core promoter element around -30 of transcription start
RcMYB11	CCG018518.1	454	494	TATA-box				core promoter element around -30 of transcription start
RcMYB11	CCG018518.1	505	545	TATA-box				core promoter element around -30 of transcription start
RcMYB11	CCG018518.1	506	546	TATA-box				core promoter element around -30 of transcription start
RcMYB11	CCG018518.1	553	593	TATA-box				core promoter element around -30 of transcription start
RcMYB11	CCG018518.1	573	613	TATA-box				core promoter element around -30 of transcription start
RcMYB11	CCG018518.1	574	614	TATA-box				core promoter element around -30 of transcription start
RcMYB11	CCG018518.1	952	992	TATA-box				core promoter element around -30 of transcription start
RcMYB11	CCG018518.1	1165	1205	TATA-box				core promoter element around -30 of transcription start
RcMYB11	CCG018518.1	1291	1331	TATA-box				core promoter element around -30 of transcription start
RcMYB11	CCG018518.1	268	308	CAAT-box				common cis-acting element in promoter and enhancer regions
RcMYB11	CCG018518.1	361	401	CAAT-box				common cis-acting element in promoter and enhancer regions
RcMYB11	CCG018518.1	369	409	CAAT-box				common cis-acting element in promoter and enhancer regions
RcMYB11	CCG018518.1	530	570	CAAT-box				common cis-acting element in promoter and enhancer regions
RcMYB11	CCG018518.1	662	702	CAAT-box				common cis-acting element in promoter and enhancer regions
RcMYB11	CCG018518.1	790	830	CAAT-box				common cis-acting element in promoter and enhancer regions
RcMYB11	CCG018518.1	816	856	CAAT-box				common cis-acting element in promoter and enhancer regions
RcMYB11	CCG018518.1	1019	1059	CAAT-box				common cis-acting element in promoter and enhancer regions
RcMYB11	CCG018518.1	1202	1242	CAAT-box				common cis-acting element in promoter and enhancer regions
RcMYB11	CCG018518.1	1207	1247	CAAT-box				common cis-acting element in promoter and enhancer regions
RcMYB11	CCG018518.1	1321	1361	CAAT-box				common cis-acting element in promoter and enhancer regions
RcMYB11	CCG018518.1	1363	1403	CAAT-box				common cis-acting element in promoter and enhancer regions
RcMYB11	CCG018518.1	1412	1452	CAAT-box				common cis-acting element in promoter and enhancer regions
RcMYB11	CCG018518.1	1420	1460	CAAT-box				common cis-acting element in promoter and enhancer regions
RcMYB11	CCG018518.1	1622	1662	CAAT-box				common cis-acting element in promoter and enhancer regions
RcMYB11	CCG018518.1	1837	1877	CAAT-box				common cis-acting element in promoter and enhancer regions
RcMYB11	CCG018518.1	227	267	TGA-element				auxin-responsive element
RcMYB11	CCG018518.1	58	98	AE-box				part of a module for light response
RcMYB11	CCG018518.1	404	444	LTR				cis-acting element involved in low-temperature responsiveness
RcMYB11	CCG018518.1	1189	1229	LTR				cis-acting element involved in low-temperature responsiveness
RcMYB11	CCG018518.1	1790	1830	LTR				cis-acting element involved in low-temperature responsiveness
RcMYB11	CCG018518.1	1880	1920	A-box				cis-acting regulatory element
RcMYB11	CCG018518.1	460	500	CCAAT-box				MYBHv1 binding site
RcMYB11	CCG018518.1	1675	1715	CAT-box				cis-acting regulatory element related to meristem expression
RcMYB12	CCG029536.1	959	999	TCCC-motif				part of a light responsive element
RcMYB12	CCG029536.1	417	457	GATA-motif				part of a light responsive element
RcMYB12	CCG029536.1	1485	1525	GATA-motif				part of a light responsive element
RcMYB12	CCG029536.1	1756	1796	GATA-motif				part of a light responsive element
RcMYB12	CCG029536.1	1550	1590	G-box				cis-acting regulatory element involved in light responsiveness
RcMYB12	CCG029536.1	1619	1659	G-box				cis-acting regulatory element involved in light responsiveness
RcMYB12	CCG029536.1	1668	1708	G-box				cis-acting regulatory element involved in light responsiveness
RcMYB12	CCG029536.1	1555	1595	CGTCA-motif				cis-acting regulatory element involved in the MeJA-responsiveness
RcMYB12	CCG029536.1	1670	1710	CGTCA-motif				cis-acting regulatory element involved in the MeJA-responsiveness
RcMYB12	CCG029536.1	1568	1608	TCA-element				cis-acting element involved in salicylic acid responsiveness
RcMYB12	CCG029536.1	1619	1659	ABRE				cis-acting element involved in the abscisic acid responsiveness
RcMYB12	CCG029536.1	1668	1708	ABRE				cis-acting element involved in the abscisic acid responsiveness
RcMYB12	CCG029536.1	150	190	TATA-box				core promoter element around -30 of transcription start
RcMYB12	CCG029536.1	151	191	TATA-box				core promoter element around -30 of transcription start
RcMYB12	CCG029536.1	152	192	TATA-box				core promoter element around -30 of transcription start
RcMYB12	CCG029536.1	153	193	TATA-box				core promoter element around -30 of transcription start
RcMYB12	CCG029536.1	163	203	TATA-box				core promoter element around -30 of transcription start
RcMYB12	CCG029536.1	164	204	TATA-box				core promoter element around -30 of transcription start
RcMYB12	CCG029536.1	165	205	TATA-box				core promoter element around -30 of transcription start
RcMYB12	CCG029536.1	194	234	TATA-box				core promoter element around -30 of transcription start
RcMYB12	CCG029536.1	198	238	TATA-box				core promoter element around -30 of transcription start
RcMYB12	CCG029536.1	200	240	TATA-box				core promoter element around -30 of transcription start
RcMYB12	CCG029536.1	225	265	TATA-box				core promoter element around -30 of transcription start
RcMYB12	CCG029536.1	226	266	TATA-box				core promoter element around -30 of transcription start
RcMYB12	CCG029536.1	235	275	TATA-box				core promoter element around -30 of transcription start
RcMYB12	CCG029536.1	236	276	TATA-box				core promoter element around -30 of transcription start
RcMYB12	CCG029536.1	265	305	TATA-box				core promoter element around -30 of transcription start
RcMYB12	CCG029536.1	296	336	TATA-box				core promoter element around -30 of transcription start
RcMYB12	CCG029536.1	297	337	TATA-box				core promoter element around -30 of transcription start
RcMYB12	CCG029536.1	553	593	TATA-box				core promoter element around -30 of transcription start
RcMYB12	CCG029536.1	554	594	TATA-box				core promoter element around -30 of transcription start
RcMYB12	CCG029536.1	692	732	TATA-box				core promoter element around -30 of transcription start
RcMYB12	CCG029536.1	693	733	TATA-box				core promoter element around -30 of transcription start
RcMYB12	CCG029536.1	694	734	TATA-box				core promoter element around -30 of transcription start
RcMYB12	CCG029536.1	695	735	TATA-box				core promoter element around -30 of transcription start
RcMYB12	CCG029536.1	965	1005	TATA-box				core promoter element around -30 of transcription start
RcMYB12	CCG029536.1	966	1006	TATA-box				core promoter element around -30 of transcription start
RcMYB12	CCG029536.1	967	1007	TATA-box				core promoter element around -30 of transcription start
RcMYB12	CCG029536.1	968	1008	TATA-box				core promoter element around -30 of transcription start
RcMYB12	CCG029536.1	1055	1095	TATA-box				core promoter element around -30 of transcription start
RcMYB12	CCG029536.1	1056	1096	TATA-box				core promoter element around -30 of transcription start
RcMYB12	CCG029536.1	1057	1097	TATA-box				core promoter element around -30 of transcription start
RcMYB12	CCG029536.1	1093	1133	TATA-box				core promoter element around -30 of transcription start
RcMYB12	CCG029536.1	1114	1154	TATA-box				core promoter element around -30 of transcription start
RcMYB12	CCG029536.1	1115	1155	TATA-box				core promoter element around -30 of transcription start
RcMYB12	CCG029536.1	1116	1156	TATA-box				core promoter element around -30 of transcription start
RcMYB12	CCG029536.1	1117	1157	TATA-box				core promoter element around -30 of transcription start
RcMYB12	CCG029536.1	1119	1159	TATA-box				core promoter element around -30 of transcription start
RcMYB12	CCG029536.1	1197	1237	TATA-box				core promoter element around -30 of transcription start
RcMYB12	CCG029536.1	1198	1238	TATA-box				core promoter element around -30 of transcription start
RcMYB12	CCG029536.1	1344	1384	TATA-box				core promoter element around -30 of transcription start
RcMYB12	CCG029536.1	1345	1385	TATA-box				core promoter element around -30 of transcription start
RcMYB12	CCG029536.1	1346	1386	TATA-box				core promoter element around -30 of transcription start
RcMYB12	CCG029536.1	1697	1737	TATA-box				core promoter element around -30 of transcription start
RcMYB12	CCG029536.1	1698	1738	TATA-box				core promoter element around -30 of transcription start
RcMYB12	CCG029536.1	160	200	CAAT-box				common cis-acting element in promoter and enhancer regions
RcMYB12	CCG029536.1	209	249	CAAT-box				common cis-acting element in promoter and enhancer regions
RcMYB12	CCG029536.1	740	780	CAAT-box				common cis-acting element in promoter and enhancer regions
RcMYB12	CCG029536.1	792	832	CAAT-box				common cis-acting element in promoter and enhancer regions
RcMYB12	CCG029536.1	806	846	CAAT-box				common cis-acting element in promoter and enhancer regions
RcMYB12	CCG029536.1	947	987	CAAT-box				common cis-acting element in promoter and enhancer regions
RcMYB12	CCG029536.1	1080	1120	CAAT-box				common cis-acting element in promoter and enhancer regions
RcMYB12	CCG029536.1	1100	1140	CAAT-box				common cis-acting element in promoter and enhancer regions
RcMYB12	CCG029536.1	1417	1457	CAAT-box				common cis-acting element in promoter and enhancer regions
RcMYB12	CCG029536.1	1635	1675	CAAT-box				common cis-acting element in promoter and enhancer regions
RcMYB12	CCG029536.1	1643	1683	CAAT-box				common cis-acting element in promoter and enhancer regions
RcMYB12	CCG029536.1	1706	1746	CAAT-box				common cis-acting element in promoter and enhancer regions
RcMYB12	CCG029536.1	1711	1751	CAAT-box				common cis-acting element in promoter and enhancer regions
RcMYB12	CCG029536.1	1860	1900	CAAT-box				common cis-acting element in promoter and enhancer regions
RcMYB12	CCG029536.1	1933	1973	CAAT-box				common cis-acting element in promoter and enhancer regions
RcMYB12	CCG029536.1	1555	1595	TGACG-motif				cis-acting regulatory element involved in the MeJA-responsiveness
RcMYB12	CCG029536.1	1670	1710	TGACG-motif				cis-acting regulatory element involved in the MeJA-responsiveness
RcMYB12	CCG029536.1	243	283	Box 4				part of a conserved DNA module involved in light responsiveness
RcMYB12	CCG029536.1	272	312	Box 4				part of a conserved DNA module involved in light responsiveness
RcMYB12	CCG029536.1	300	340	Box 4				part of a conserved DNA module involved in light responsiveness
RcMYB12	CCG029536.1	1517	1557	Box 4				part of a conserved DNA module involved in light responsiveness
RcMYB12	CCG029536.1	1723	1763	Box 4				part of a conserved DNA module involved in light responsiveness
RcMYB12	CCG029536.1	483	523	A-box				cis-acting regulatory element
RcMYB12	CCG029536.1	1973	2013	A-box				cis-acting regulatory element
RcMYB12	CCG029536.1	1510	1550	CCAAT-box				MYBHv1 binding site
RcMYB12	CCG029536.1	1743	1783	CCAAT-box				MYBHv1 binding site
RcMYB13	CCG027446.1	171	211	P-box				gibberellin-responsive element
RcMYB13	CCG027446.1	965	1005	P-box				gibberellin-responsive element
RcMYB13	CCG027446.1	98	138	CAAT-box				common cis-acting element in promoter and enhancer regions
RcMYB13	CCG027446.1	123	163	CAAT-box				common cis-acting element in promoter and enhancer regions
RcMYB13	CCG027446.1	238	278	CAAT-box				common cis-acting element in promoter and enhancer regions
RcMYB13	CCG027446.1	383	423	CAAT-box				common cis-acting element in promoter and enhancer regions
RcMYB13	CCG027446.1	481	521	CAAT-box				common cis-acting element in promoter and enhancer regions
RcMYB13	CCG027446.1	623	663	CAAT-box				common cis-acting element in promoter and enhancer regions
RcMYB13	CCG027446.1	650	690	CAAT-box				common cis-acting element in promoter and enhancer regions
RcMYB13	CCG027446.1	822	862	CAAT-box				common cis-acting element in promoter and enhancer regions
RcMYB13	CCG027446.1	926	966	CAAT-box				common cis-acting element in promoter and enhancer regions
RcMYB13	CCG027446.1	989	1029	CAAT-box				common cis-acting element in promoter and enhancer regions
RcMYB13	CCG027446.1	1340	1380	CAAT-box				common cis-acting element in promoter and enhancer regions
RcMYB13	CCG027446.1	1405	1445	CAAT-box				common cis-acting element in promoter and enhancer regions
RcMYB13	CCG027446.1	1599	1639	CAAT-box				common cis-acting element in promoter and enhancer regions
RcMYB13	CCG027446.1	1619	1659	CAAT-box				common cis-acting element in promoter and enhancer regions
RcMYB13	CCG027446.1	1626	1666	CAAT-box				common cis-acting element in promoter and enhancer regions
RcMYB13	CCG027446.1	1882	1922	CAAT-box				common cis-acting element in promoter and enhancer regions
RcMYB13	CCG027446.1	430	470	GT1-motif				light responsive element
RcMYB13	CCG027446.1	1733	1773	GT1-motif				light responsive element
RcMYB13	CCG027446.1	952	992	TATA-box				core promoter element around -30 of transcription start
RcMYB13	CCG027446.1	953	993	TATA-box				core promoter element around -30 of transcription start
RcMYB13	CCG027446.1	1225	1265	TATA-box				core promoter element around -30 of transcription start
RcMYB13	CCG027446.1	1428	1468	TATA-box				core promoter element around -30 of transcription start
RcMYB13	CCG027446.1	1429	1469	TATA-box				core promoter element around -30 of transcription start
RcMYB13	CCG027446.1	1430	1470	TATA-box				core promoter element around -30 of transcription start
RcMYB13	CCG027446.1	1612	1652	TATA-box				core promoter element around -30 of transcription start
RcMYB13	CCG027446.1	1613	1653	TATA-box				core promoter element around -30 of transcription start
RcMYB13	CCG027446.1	1614	1654	TATA-box				core promoter element around -30 of transcription start
RcMYB13	CCG027446.1	1615	1655	TATA-box				core promoter element around -30 of transcription start
RcMYB13	CCG027446.1	1752	1792	TATA-box				core promoter element around -30 of transcription start
RcMYB13	CCG027446.1	1833	1873	TATA-box				core promoter element around -30 of transcription start
RcMYB13	CCG027446.1	1835	1875	TATA-box				core promoter element around -30 of transcription start
RcMYB13	CCG027446.1	1836	1876	TATA-box				core promoter element around -30 of transcription start
RcMYB13	CCG027446.1	1837	1877	TATA-box				core promoter element around -30 of transcription start
RcMYB13	CCG027446.1	31	71	Box 4				part of a conserved DNA module involved in light responsiveness
RcMYB13	CCG027446.1	801	841	Box 4				part of a conserved DNA module involved in light responsiveness
RcMYB13	CCG027446.1	372	412	G-box				cis-acting regulatory element involved in light responsiveness
RcMYB13	CCG027446.1	1545	1585	G-box				cis-acting regulatory element involved in light responsiveness
RcMYB13	CCG027446.1	1546	1586	G-box				cis-acting regulatory element involved in light responsiveness
RcMYB13	CCG027446.1	455	495	GATA-motif				part of a light responsive element
RcMYB13	CCG027446.1	992	1032	GCN4_motif				cis-regulatory element involved in endosperm expression
RcMYB13	CCG027446.1	1703	1743	GCN4_motif				cis-regulatory element involved in endosperm expression
RcMYB13	CCG027446.1	195	235	ARE				cis-acting regulatory element essential for the anaerobic induction
RcMYB13	CCG027446.1	850	890	ARE				cis-acting regulatory element essential for the anaerobic induction
RcMYB13	CCG027446.1	246	286	O2-site				cis-acting regulatory element involved in zein metabolism regulation
RcMYB13	CCG027446.1	1565	1605	O2-site				cis-acting regulatory element involved in zein metabolism regulation
RcMYB13	CCG027446.1	-7	33	TCA-element				cis-acting element involved in salicylic acid responsiveness
RcMYB13	CCG027446.1	372	412	G-Box				cis-acting regulatory element involved in light responsiveness
RcMYB13	CCG027446.1	1546	1586	G-Box				cis-acting regulatory element involved in light responsiveness
RcMYB13	CCG027446.1	372	412	ABRE				cis-acting element involved in the abscisic acid responsiveness
RcMYB13	CCG027446.1	373	413	ABRE				cis-acting element involved in the abscisic acid responsiveness
RcMYB13	CCG027446.1	1546	1586	ABRE				cis-acting element involved in the abscisic acid responsiveness
RcMYB13	CCG027446.1	1547	1587	ABRE				cis-acting element involved in the abscisic acid responsiveness
RcMYB13	CCG027446.1	1260	1300	MBS				MYB binding site involved in drought-inducibility
RcMYB13	CCG027446.1	1649	1689	MBS				MYB binding site involved in drought-inducibility
RcMYB13	CCG027446.1	1685	1725	MBS				MYB binding site involved in drought-inducibility
RcMYB13	CCG027446.1	1918	1958	MBS				MYB binding site involved in drought-inducibility
RcMYB14	CCG019265.1	1861	1901	TCCC-motif				part of a light responsive element
RcMYB14	CCG019265.1	1865	1905	GATA-motif				part of a light responsive element
RcMYB14	CCG019265.1	1871	1911	GATA-motif				part of a light responsive element
RcMYB14	CCG019265.1	966	1006	CGTCA-motif				cis-acting regulatory element involved in the MeJA-responsiveness
RcMYB14	CCG019265.1	1053	1093	CGTCA-motif				cis-acting regulatory element involved in the MeJA-responsiveness
RcMYB14	CCG019265.1	1294	1334	CGTCA-motif				cis-acting regulatory element involved in the MeJA-responsiveness
RcMYB14	CCG019265.1	1789	1829	MBS				MYB binding site involved in drought-inducibility
RcMYB14	CCG019265.1	877	917	AE-box				part of a module for light response
RcMYB14	CCG019265.1	1520	1560	AE-box				part of a module for light response
RcMYB14	CCG019265.1	906	946	TATA-box				core promoter element around -30 of transcription start
RcMYB14	CCG019265.1	1081	1121	TATA-box				core promoter element around -30 of transcription start
RcMYB14	CCG019265.1	1082	1122	TATA-box				core promoter element around -30 of transcription start
RcMYB14	CCG019265.1	1083	1123	TATA-box				core promoter element around -30 of transcription start
RcMYB14	CCG019265.1	1084	1124	TATA-box				core promoter element around -30 of transcription start
RcMYB14	CCG019265.1	1220	1260	TATA-box				core promoter element around -30 of transcription start
RcMYB14	CCG019265.1	1221	1261	TATA-box				core promoter element around -30 of transcription start
RcMYB14	CCG019265.1	1222	1262	TATA-box				core promoter element around -30 of transcription start
RcMYB14	CCG019265.1	1235	1275	TATA-box				core promoter element around -30 of transcription start
RcMYB14	CCG019265.1	1251	1291	TATA-box				core promoter element around -30 of transcription start
RcMYB14	CCG019265.1	1252	1292	TATA-box				core promoter element around -30 of transcription start
RcMYB14	CCG019265.1	1253	1293	TATA-box				core promoter element around -30 of transcription start
RcMYB14	CCG019265.1	1477	1517	TATA-box				core promoter element around -30 of transcription start
RcMYB14	CCG019265.1	1479	1519	TATA-box				core promoter element around -30 of transcription start
RcMYB14	CCG019265.1	1568	1608	TATA-box				core promoter element around -30 of transcription start
RcMYB14	CCG019265.1	1658	1698	TATA-box				core promoter element around -30 of transcription start
RcMYB14	CCG019265.1	1659	1699	TATA-box				core promoter element around -30 of transcription start
RcMYB14	CCG019265.1	1772	1812	TATA-box				core promoter element around -30 of transcription start
RcMYB14	CCG019265.1	1773	1813	TATA-box				core promoter element around -30 of transcription start
RcMYB14	CCG019265.1	1774	1814	TATA-box				core promoter element around -30 of transcription start
RcMYB14	CCG019265.1	1775	1815	TATA-box				core promoter element around -30 of transcription start
RcMYB14	CCG019265.1	1777	1817	TATA-box				core promoter element around -30 of transcription start
RcMYB14	CCG019265.1	914	954	CAAT-box				common cis-acting element in promoter and enhancer regions
RcMYB14	CCG019265.1	1213	1253	CAAT-box				common cis-acting element in promoter and enhancer regions
RcMYB14	CCG019265.1	1360	1400	CAAT-box				common cis-acting element in promoter and enhancer regions
RcMYB14	CCG019265.1	1385	1425	CAAT-box				common cis-acting element in promoter and enhancer regions
RcMYB14	CCG019265.1	1390	1430	CAAT-box				common cis-acting element in promoter and enhancer regions
RcMYB14	CCG019265.1	1414	1454	CAAT-box				common cis-acting element in promoter and enhancer regions
RcMYB14	CCG019265.1	1619	1659	CAAT-box				common cis-acting element in promoter and enhancer regions
RcMYB14	CCG019265.1	1640	1680	CAAT-box				common cis-acting element in promoter and enhancer regions
RcMYB14	CCG019265.1	1667	1707	CAAT-box				common cis-acting element in promoter and enhancer regions
RcMYB14	CCG019265.1	1714	1754	CAAT-box				common cis-acting element in promoter and enhancer regions
RcMYB14	CCG019265.1	1739	1779	CAAT-box				common cis-acting element in promoter and enhancer regions
RcMYB14	CCG019265.1	966	1006	TGACG-motif				cis-acting regulatory element involved in the MeJA-responsiveness
RcMYB14	CCG019265.1	1053	1093	TGACG-motif				cis-acting regulatory element involved in the MeJA-responsiveness
RcMYB14	CCG019265.1	1294	1334	TGACG-motif				cis-acting regulatory element involved in the MeJA-responsiveness
RcMYB14	CCG019265.1	1402	1442	Box 4				part of a conserved DNA module involved in light responsiveness
RcMYB15	CCG019266.2	5	45	Box 4				part of a conserved DNA module involved in light responsiveness
RcMYB15	CCG019266.2	1378	1418	Box 4				part of a conserved DNA module involved in light responsiveness
RcMYB15	CCG019266.2	628	668	TGACG-motif				cis-acting regulatory element involved in the MeJA-responsiveness
RcMYB15	CCG019266.2	928	968	TGACG-motif				cis-acting regulatory element involved in the MeJA-responsiveness
RcMYB15	CCG019266.2	1015	1055	TGACG-motif				cis-acting regulatory element involved in the MeJA-responsiveness
RcMYB15	CCG019266.2	1271	1311	TGACG-motif				cis-acting regulatory element involved in the MeJA-responsiveness
RcMYB15	CCG019266.2	1460	1500	TGACG-motif				cis-acting regulatory element involved in the MeJA-responsiveness
RcMYB15	CCG019266.2	186	226	MRE				MYB binding site involved in light responsiveness
RcMYB15	CCG019266.2	835	875	AE-box				part of a module for light response
RcMYB15	CCG019266.2	1502	1542	AE-box				part of a module for light response
RcMYB15	CCG019266.2	-16	24	TATA-box				core promoter element around -30 of transcription start
RcMYB15	CCG019266.2	-14	26	TATA-box				core promoter element around -30 of transcription start
RcMYB15	CCG019266.2	-9	31	TATA-box				core promoter element around -30 of transcription start
RcMYB15	CCG019266.2	-8	32	TATA-box				core promoter element around -30 of transcription start
RcMYB15	CCG019266.2	-7	33	TATA-box				core promoter element around -30 of transcription start
RcMYB15	CCG019266.2	-6	34	TATA-box				core promoter element around -30 of transcription start
RcMYB15	CCG019266.2	93	133	TATA-box				core promoter element around -30 of transcription start
RcMYB15	CCG019266.2	94	134	TATA-box				core promoter element around -30 of transcription start
RcMYB15	CCG019266.2	304	344	TATA-box				core promoter element around -30 of transcription start
RcMYB15	CCG019266.2	305	345	TATA-box				core promoter element around -30 of transcription start
RcMYB15	CCG019266.2	404	444	TATA-box				core promoter element around -30 of transcription start
RcMYB15	CCG019266.2	405	445	TATA-box				core promoter element around -30 of transcription start
RcMYB15	CCG019266.2	406	446	TATA-box				core promoter element around -30 of transcription start
RcMYB15	CCG019266.2	408	448	TATA-box				core promoter element around -30 of transcription start
RcMYB15	CCG019266.2	452	492	TATA-box				core promoter element around -30 of transcription start
RcMYB15	CCG019266.2	453	493	TATA-box				core promoter element around -30 of transcription start
RcMYB15	CCG019266.2	454	494	TATA-box				core promoter element around -30 of transcription start
RcMYB15	CCG019266.2	455	495	TATA-box				core promoter element around -30 of transcription start
RcMYB15	CCG019266.2	456	496	TATA-box				core promoter element around -30 of transcription start
RcMYB15	CCG019266.2	459	499	TATA-box				core promoter element around -30 of transcription start
RcMYB15	CCG019266.2	460	500	TATA-box				core promoter element around -30 of transcription start
RcMYB15	CCG019266.2	461	501	TATA-box				core promoter element around -30 of transcription start
RcMYB15	CCG019266.2	492	532	TATA-box				core promoter element around -30 of transcription start
RcMYB15	CCG019266.2	493	533	TATA-box				core promoter element around -30 of transcription start
RcMYB15	CCG019266.2	688	728	TATA-box				core promoter element around -30 of transcription start
RcMYB15	CCG019266.2	689	729	TATA-box				core promoter element around -30 of transcription start
RcMYB15	CCG019266.2	741	781	TATA-box				core promoter element around -30 of transcription start
RcMYB15	CCG019266.2	742	782	TATA-box				core promoter element around -30 of transcription start
RcMYB15	CCG019266.2	743	783	TATA-box				core promoter element around -30 of transcription start
RcMYB15	CCG019266.2	744	784	TATA-box				core promoter element around -30 of transcription start
RcMYB15	CCG019266.2	864	904	TATA-box				core promoter element around -30 of transcription start
RcMYB15	CCG019266.2	1058	1098	TATA-box				core promoter element around -30 of transcription start
RcMYB15	CCG019266.2	1059	1099	TATA-box				core promoter element around -30 of transcription start
RcMYB15	CCG019266.2	1060	1100	TATA-box				core promoter element around -30 of transcription start
RcMYB15	CCG019266.2	1196	1236	TATA-box				core promoter element around -30 of transcription start
RcMYB15	CCG019266.2	1197	1237	TATA-box				core promoter element around -30 of transcription start
RcMYB15	CCG019266.2	1198	1238	TATA-box				core promoter element around -30 of transcription start
RcMYB15	CCG019266.2	1228	1268	TATA-box				core promoter element around -30 of transcription start
RcMYB15	CCG019266.2	1229	1269	TATA-box				core promoter element around -30 of transcription start
RcMYB15	CCG019266.2	1230	1270	TATA-box				core promoter element around -30 of transcription start
RcMYB15	CCG019266.2	1452	1492	TATA-box				core promoter element around -30 of transcription start
RcMYB15	CCG019266.2	1454	1494	TATA-box				core promoter element around -30 of transcription start
RcMYB15	CCG019266.2	1521	1561	TATA-box				core promoter element around -30 of transcription start
RcMYB15	CCG019266.2	1575	1615	TATA-box				core promoter element around -30 of transcription start
RcMYB15	CCG019266.2	1665	1705	TATA-box				core promoter element around -30 of transcription start
RcMYB15	CCG019266.2	1666	1706	TATA-box				core promoter element around -30 of transcription start
RcMYB15	CCG019266.2	1786	1826	TATA-box				core promoter element around -30 of transcription start
RcMYB15	CCG019266.2	1788	1828	TATA-box				core promoter element around -30 of transcription start
RcMYB15	CCG019266.2	1954	1994	TATA-box				core promoter element around -30 of transcription start
RcMYB15	CCG019266.2	730	770	P-box				gibberellin-responsive element
RcMYB15	CCG019266.2	150	190	CAAT-box				common cis-acting element in promoter and enhancer regions
RcMYB15	CCG019266.2	203	243	CAAT-box				common cis-acting element in promoter and enhancer regions
RcMYB15	CCG019266.2	314	354	CAAT-box				common cis-acting element in promoter and enhancer regions
RcMYB15	CCG019266.2	338	378	CAAT-box				common cis-acting element in promoter and enhancer regions
RcMYB15	CCG019266.2	537	577	CAAT-box				common cis-acting element in promoter and enhancer regions
RcMYB15	CCG019266.2	804	844	CAAT-box				common cis-acting element in promoter and enhancer regions
RcMYB15	CCG019266.2	872	912	CAAT-box				common cis-acting element in promoter and enhancer regions
RcMYB15	CCG019266.2	932	972	CAAT-box				common cis-acting element in promoter and enhancer regions
RcMYB15	CCG019266.2	1012	1052	CAAT-box				common cis-acting element in promoter and enhancer regions
RcMYB15	CCG019266.2	1189	1229	CAAT-box				common cis-acting element in promoter and enhancer regions
RcMYB15	CCG019266.2	1337	1377	CAAT-box				common cis-acting element in promoter and enhancer regions
RcMYB15	CCG019266.2	1361	1401	CAAT-box				common cis-acting element in promoter and enhancer regions
RcMYB15	CCG019266.2	1366	1406	CAAT-box				common cis-acting element in promoter and enhancer regions
RcMYB15	CCG019266.2	1382	1422	CAAT-box				common cis-acting element in promoter and enhancer regions
RcMYB15	CCG019266.2	1390	1430	CAAT-box				common cis-acting element in promoter and enhancer regions
RcMYB15	CCG019266.2	1626	1666	CAAT-box				common cis-acting element in promoter and enhancer regions
RcMYB15	CCG019266.2	1647	1687	CAAT-box				common cis-acting element in promoter and enhancer regions
RcMYB15	CCG019266.2	1674	1714	CAAT-box				common cis-acting element in promoter and enhancer regions
RcMYB15	CCG019266.2	1721	1761	CAAT-box				common cis-acting element in promoter and enhancer regions
RcMYB15	CCG019266.2	1746	1786	CAAT-box				common cis-acting element in promoter and enhancer regions
RcMYB15	CCG019266.2	533	573	GT1-motif				light responsive element
RcMYB15	CCG019266.2	549	589	GT1-motif				light responsive element
RcMYB15	CCG019266.2	1093	1133	O2-site				cis-acting regulatory element involved in zein metabolism regulation
RcMYB15	CCG019266.2	347	387	MBS				MYB binding site involved in drought-inducibility
RcMYB15	CCG019266.2	1795	1835	MBS				MYB binding site involved in drought-inducibility
RcMYB15	CCG019266.2	1867	1907	TCCC-motif				part of a light responsive element
RcMYB15	CCG019266.2	628	668	CGTCA-motif				cis-acting regulatory element involved in the MeJA-responsiveness
RcMYB15	CCG019266.2	928	968	CGTCA-motif				cis-acting regulatory element involved in the MeJA-responsiveness
RcMYB15	CCG019266.2	1015	1055	CGTCA-motif				cis-acting regulatory element involved in the MeJA-responsiveness
RcMYB15	CCG019266.2	1271	1311	CGTCA-motif				cis-acting regulatory element involved in the MeJA-responsiveness
RcMYB15	CCG019266.2	1460	1500	CGTCA-motif				cis-acting regulatory element involved in the MeJA-responsiveness
RcMYB16	CCG001108.1	701	741	ARE				cis-acting regulatory element essential for the anaerobic induction
RcMYB16	CCG001108.1	887	927	ARE				cis-acting regulatory element essential for the anaerobic induction
RcMYB16	CCG001108.1	1141	1181	ARE				cis-acting regulatory element essential for the anaerobic induction
RcMYB16	CCG001108.1	1915	1955	ARE				cis-acting regulatory element essential for the anaerobic induction
RcMYB16	CCG001108.1	953	993	G-box				cis-acting regulatory element involved in light responsiveness
RcMYB16	CCG001108.1	1796	1836	G-box				cis-acting regulatory element involved in light responsiveness
RcMYB16	CCG001108.1	1718	1758	CGTCA-motif				cis-acting regulatory element involved in the MeJA-responsiveness
RcMYB16	CCG001108.1	1799	1839	ABRE				cis-acting element involved in the abscisic acid responsiveness
RcMYB16	CCG001108.1	1799	1839	G-Box				cis-acting regulatory element involved in light responsiveness
RcMYB16	CCG001108.1	443	483	TCA-element				cis-acting element involved in salicylic acid responsiveness
RcMYB16	CCG001108.1	566	606	TCA-element				cis-acting element involved in salicylic acid responsiveness
RcMYB16	CCG001108.1	1445	1485	O2-site				cis-acting regulatory element involved in zein metabolism regulation
RcMYB16	CCG001108.1	55	95	TATA-box				core promoter element around -30 of transcription start
RcMYB16	CCG001108.1	178	218	TATA-box				core promoter element around -30 of transcription start
RcMYB16	CCG001108.1	179	219	TATA-box				core promoter element around -30 of transcription start
RcMYB16	CCG001108.1	202	242	TATA-box				core promoter element around -30 of transcription start
RcMYB16	CCG001108.1	416	456	TATA-box				core promoter element around -30 of transcription start
RcMYB16	CCG001108.1	417	457	TATA-box				core promoter element around -30 of transcription start
RcMYB16	CCG001108.1	531	571	TATA-box				core promoter element around -30 of transcription start
RcMYB16	CCG001108.1	532	572	TATA-box				core promoter element around -30 of transcription start
RcMYB16	CCG001108.1	1177	1217	TATA-box				core promoter element around -30 of transcription start
RcMYB16	CCG001108.1	1179	1219	TATA-box				core promoter element around -30 of transcription start
RcMYB16	CCG001108.1	1231	1271	TATA-box				core promoter element around -30 of transcription start
RcMYB16	CCG001108.1	1356	1396	TATA-box				core promoter element around -30 of transcription start
RcMYB16	CCG001108.1	1595	1635	TATA-box				core promoter element around -30 of transcription start
RcMYB16	CCG001108.1	1647	1687	TATA-box				core promoter element around -30 of transcription start
RcMYB16	CCG001108.1	1648	1688	TATA-box				core promoter element around -30 of transcription start
RcMYB16	CCG001108.1	1649	1689	TATA-box				core promoter element around -30 of transcription start
RcMYB16	CCG001108.1	1650	1690	TATA-box				core promoter element around -30 of transcription start
RcMYB16	CCG001108.1	1680	1720	TATA-box				core promoter element around -30 of transcription start
RcMYB16	CCG001108.1	1789	1829	TATA-box				core promoter element around -30 of transcription start
RcMYB16	CCG001108.1	1790	1830	TATA-box				core promoter element around -30 of transcription start
RcMYB16	CCG001108.1	1918	1958	TATA-box				core promoter element around -30 of transcription start
RcMYB16	CCG001108.1	1919	1959	TATA-box				core promoter element around -30 of transcription start
RcMYB16	CCG001108.1	1920	1960	TATA-box				core promoter element around -30 of transcription start
RcMYB16	CCG001108.1	1927	1967	TATA-box				core promoter element around -30 of transcription start
RcMYB16	CCG001108.1	1930	1970	TATA-box				core promoter element around -30 of transcription start
RcMYB16	CCG001108.1	1931	1971	TATA-box				core promoter element around -30 of transcription start
RcMYB16	CCG001108.1	1944	1984	TATA-box				core promoter element around -30 of transcription start
RcMYB16	CCG001108.1	1945	1985	TATA-box				core promoter element around -30 of transcription start
RcMYB16	CCG001108.1	1946	1986	TATA-box				core promoter element around -30 of transcription start
RcMYB16	CCG001108.1	1974	2014	TATA-box				core promoter element around -30 of transcription start
RcMYB16	CCG001108.1	1975	2015	TATA-box				core promoter element around -30 of transcription start
RcMYB16	CCG001108.1	1976	2016	TATA-box				core promoter element around -30 of transcription start
RcMYB16	CCG001108.1	40	80	CAAT-box				common cis-acting element in promoter and enhancer regions
RcMYB16	CCG001108.1	121	161	CAAT-box				common cis-acting element in promoter and enhancer regions
RcMYB16	CCG001108.1	363	403	CAAT-box				common cis-acting element in promoter and enhancer regions
RcMYB16	CCG001108.1	554	594	CAAT-box				common cis-acting element in promoter and enhancer regions
RcMYB16	CCG001108.1	655	695	CAAT-box				common cis-acting element in promoter and enhancer regions
RcMYB16	CCG001108.1	657	697	CAAT-box				common cis-acting element in promoter and enhancer regions
RcMYB16	CCG001108.1	788	828	CAAT-box				common cis-acting element in promoter and enhancer regions
RcMYB16	CCG001108.1	834	874	CAAT-box				common cis-acting element in promoter and enhancer regions
RcMYB16	CCG001108.1	841	881	CAAT-box				common cis-acting element in promoter and enhancer regions
RcMYB16	CCG001108.1	915	955	CAAT-box				common cis-acting element in promoter and enhancer regions
RcMYB16	CCG001108.1	1038	1078	CAAT-box				common cis-acting element in promoter and enhancer regions
RcMYB16	CCG001108.1	1251	1291	CAAT-box				common cis-acting element in promoter and enhancer regions
RcMYB16	CCG001108.1	1383	1423	CAAT-box				common cis-acting element in promoter and enhancer regions
RcMYB16	CCG001108.1	1674	1714	CAAT-box				common cis-acting element in promoter and enhancer regions
RcMYB16	CCG001108.1	1689	1729	CAAT-box				common cis-acting element in promoter and enhancer regions
RcMYB16	CCG001108.1	1830	1870	CAAT-box				common cis-acting element in promoter and enhancer regions
RcMYB16	CCG001108.1	1839	1879	CAAT-box				common cis-acting element in promoter and enhancer regions
RcMYB16	CCG001108.1	1870	1910	CAAT-box				common cis-acting element in promoter and enhancer regions
RcMYB16	CCG001108.1	1876	1916	CAAT-box				common cis-acting element in promoter and enhancer regions
RcMYB16	CCG001108.1	1913	1953	CAAT-box				common cis-acting element in promoter and enhancer regions
RcMYB16	CCG001108.1	2	42	LTR				cis-acting element involved in low-temperature responsiveness
RcMYB16	CCG001108.1	288	328	A-box				cis-acting regulatory element
RcMYB16	CCG001108.1	78	118	Box 4				part of a conserved DNA module involved in light responsiveness
RcMYB16	CCG001108.1	1400	1440	Box 4				part of a conserved DNA module involved in light responsiveness
RcMYB16	CCG001108.1	1404	1444	Box 4				part of a conserved DNA module involved in light responsiveness
RcMYB16	CCG001108.1	1959	1999	Box 4				part of a conserved DNA module involved in light responsiveness
RcMYB16	CCG001108.1	1718	1758	TGACG-motif				cis-acting regulatory element involved in the MeJA-responsiveness
RcMYB17	CCG021717.1	1049	1089	TGA-element				auxin-responsive element
RcMYB17	CCG021717.1	-8	32	TATA-box				core promoter element around -30 of transcription start
RcMYB17	CCG021717.1	-7	33	TATA-box				core promoter element around -30 of transcription start
RcMYB17	CCG021717.1	-6	34	TATA-box				core promoter element around -30 of transcription start
RcMYB17	CCG021717.1	-5	35	TATA-box				core promoter element around -30 of transcription start
RcMYB17	CCG021717.1	193	233	TATA-box				core promoter element around -30 of transcription start
RcMYB17	CCG021717.1	194	234	TATA-box				core promoter element around -30 of transcription start
RcMYB17	CCG021717.1	195	235	TATA-box				core promoter element around -30 of transcription start
RcMYB17	CCG021717.1	232	272	TATA-box				core promoter element around -30 of transcription start
RcMYB17	CCG021717.1	234	274	TATA-box				core promoter element around -30 of transcription start
RcMYB17	CCG021717.1	273	313	TATA-box				core promoter element around -30 of transcription start
RcMYB17	CCG021717.1	274	314	TATA-box				core promoter element around -30 of transcription start
RcMYB17	CCG021717.1	275	315	TATA-box				core promoter element around -30 of transcription start
RcMYB17	CCG021717.1	527	567	TATA-box				core promoter element around -30 of transcription start
RcMYB17	CCG021717.1	901	941	TATA-box				core promoter element around -30 of transcription start
RcMYB17	CCG021717.1	902	942	TATA-box				core promoter element around -30 of transcription start
RcMYB17	CCG021717.1	903	943	TATA-box				core promoter element around -30 of transcription start
RcMYB17	CCG021717.1	904	944	TATA-box				core promoter element around -30 of transcription start
RcMYB17	CCG021717.1	1398	1438	TATA-box				core promoter element around -30 of transcription start
RcMYB17	CCG021717.1	1400	1440	TATA-box				core promoter element around -30 of transcription start
RcMYB17	CCG021717.1	1515	1555	TATA-box				core promoter element around -30 of transcription start
RcMYB17	CCG021717.1	1590	1630	TATA-box				core promoter element around -30 of transcription start
RcMYB17	CCG021717.1	1591	1631	TATA-box				core promoter element around -30 of transcription start
RcMYB17	CCG021717.1	1605	1645	TATA-box				core promoter element around -30 of transcription start
RcMYB17	CCG021717.1	1657	1697	TATA-box				core promoter element around -30 of transcription start
RcMYB17	CCG021717.1	1710	1750	TATA-box				core promoter element around -30 of transcription start
RcMYB17	CCG021717.1	1712	1752	TATA-box				core promoter element around -30 of transcription start
RcMYB17	CCG021717.1	1713	1753	TATA-box				core promoter element around -30 of transcription start
RcMYB17	CCG021717.1	1714	1754	TATA-box				core promoter element around -30 of transcription start
RcMYB17	CCG021717.1	534	574	TCT-motif				part of a light responsive element
RcMYB17	CCG021717.1	578	618	P-box				gibberellin-responsive element
RcMYB17	CCG021717.1	-16	24	CAAT-box				common cis-acting element in promoter and enhancer regions
RcMYB17	CCG021717.1	108	148	CAAT-box				common cis-acting element in promoter and enhancer regions
RcMYB17	CCG021717.1	133	173	CAAT-box				common cis-acting element in promoter and enhancer regions
RcMYB17	CCG021717.1	300	340	CAAT-box				common cis-acting element in promoter and enhancer regions
RcMYB17	CCG021717.1	372	412	CAAT-box				common cis-acting element in promoter and enhancer regions
RcMYB17	CCG021717.1	476	516	CAAT-box				common cis-acting element in promoter and enhancer regions
RcMYB17	CCG021717.1	654	694	CAAT-box				common cis-acting element in promoter and enhancer regions
RcMYB17	CCG021717.1	719	759	CAAT-box				common cis-acting element in promoter and enhancer regions
RcMYB17	CCG021717.1	870	910	CAAT-box				common cis-acting element in promoter and enhancer regions
RcMYB17	CCG021717.1	959	999	CAAT-box				common cis-acting element in promoter and enhancer regions
RcMYB17	CCG021717.1	1098	1138	CAAT-box				common cis-acting element in promoter and enhancer regions
RcMYB17	CCG021717.1	1428	1468	CAAT-box				common cis-acting element in promoter and enhancer regions
RcMYB17	CCG021717.1	1505	1545	CAAT-box				common cis-acting element in promoter and enhancer regions
RcMYB17	CCG021717.1	1566	1606	CAAT-box				common cis-acting element in promoter and enhancer regions
RcMYB17	CCG021717.1	1599	1639	CAAT-box				common cis-acting element in promoter and enhancer regions
RcMYB17	CCG021717.1	1903	1943	CAAT-box				common cis-acting element in promoter and enhancer regions
RcMYB17	CCG021717.1	1912	1952	CAAT-box				common cis-acting element in promoter and enhancer regions
RcMYB17	CCG021717.1	1938	1978	CAAT-box				common cis-acting element in promoter and enhancer regions
RcMYB17	CCG021717.1	984	1024	GT1-motif				light responsive element
RcMYB17	CCG021717.1	1133	1173	TGACG-motif				cis-acting regulatory element involved in the MeJA-responsiveness
RcMYB17	CCG021717.1	1551	1591	Box 4				part of a conserved DNA module involved in light responsiveness
RcMYB17	CCG021717.1	1818	1858	Box 4				part of a conserved DNA module involved in light responsiveness
RcMYB17	CCG021717.1	1898	1938	LTR				cis-acting element involved in low-temperature responsiveness
RcMYB17	CCG021717.1	1133	1173	CGTCA-motif				cis-acting regulatory element involved in the MeJA-responsiveness
RcMYB17	CCG021717.1	325	365	TC-rich repeats				cis-acting element involved in defense and stress responsiveness
RcMYB17	CCG021717.1	684	724	ARE				cis-acting regulatory element essential for the anaerobic induction
RcMYB17	CCG021717.1	714	754	ARE				cis-acting regulatory element essential for the anaerobic induction
RcMYB17	CCG021717.1	1700	1740	TCA-element				cis-acting element involved in salicylic acid responsiveness
RcMYB17	CCG021717.1	142	182	MBS				MYB binding site involved in drought-inducibility
RcMYB17	CCG021717.1	17	57	ABRE				cis-acting element involved in the abscisic acid responsiveness
RcMYB18	CCG029787.1	38	78	Box 4				part of a conserved DNA module involved in light responsiveness
RcMYB18	CCG029787.1	814	854	TGACG-motif				cis-acting regulatory element involved in the MeJA-responsiveness
RcMYB18	CCG029787.1	1318	1358	TGACG-motif				cis-acting regulatory element involved in the MeJA-responsiveness
RcMYB18	CCG029787.1	449	489	A-box				cis-acting regulatory element
RcMYB18	CCG029787.1	807	847	LTR				cis-acting element involved in low-temperature responsiveness
RcMYB18	CCG029787.1	1486	1526	P-box				gibberellin-responsive element
RcMYB18	CCG029787.1	4	44	CAAT-box				common cis-acting element in promoter and enhancer regions
RcMYB18	CCG029787.1	149	189	CAAT-box				common cis-acting element in promoter and enhancer regions
RcMYB18	CCG029787.1	542	582	CAAT-box				common cis-acting element in promoter and enhancer regions
RcMYB18	CCG029787.1	551	591	CAAT-box				common cis-acting element in promoter and enhancer regions
RcMYB18	CCG029787.1	771	811	CAAT-box				common cis-acting element in promoter and enhancer regions
RcMYB18	CCG029787.1	931	971	CAAT-box				common cis-acting element in promoter and enhancer regions
RcMYB18	CCG029787.1	996	1036	CAAT-box				common cis-acting element in promoter and enhancer regions
RcMYB18	CCG029787.1	1029	1069	CAAT-box				common cis-acting element in promoter and enhancer regions
RcMYB18	CCG029787.1	1220	1260	CAAT-box				common cis-acting element in promoter and enhancer regions
RcMYB18	CCG029787.1	1518	1558	CAAT-box				common cis-acting element in promoter and enhancer regions
RcMYB18	CCG029787.1	1550	1590	CAAT-box				common cis-acting element in promoter and enhancer regions
RcMYB18	CCG029787.1	1562	1602	CAAT-box				common cis-acting element in promoter and enhancer regions
RcMYB18	CCG029787.1	1679	1719	CAAT-box				common cis-acting element in promoter and enhancer regions
RcMYB18	CCG029787.1	1727	1767	CAAT-box				common cis-acting element in promoter and enhancer regions
RcMYB18	CCG029787.1	-9	31	TATA-box				core promoter element around -30 of transcription start
RcMYB18	CCG029787.1	-8	32	TATA-box				core promoter element around -30 of transcription start
RcMYB18	CCG029787.1	-7	33	TATA-box				core promoter element around -30 of transcription start
RcMYB18	CCG029787.1	-6	34	TATA-box				core promoter element around -30 of transcription start
RcMYB18	CCG029787.1	17	57	TATA-box				core promoter element around -30 of transcription start
RcMYB18	CCG029787.1	18	58	TATA-box				core promoter element around -30 of transcription start
RcMYB18	CCG029787.1	19	59	TATA-box				core promoter element around -30 of transcription start
RcMYB18	CCG029787.1	20	60	TATA-box				core promoter element around -30 of transcription start
RcMYB18	CCG029787.1	21	61	TATA-box				core promoter element around -30 of transcription start
RcMYB18	CCG029787.1	22	62	TATA-box				core promoter element around -30 of transcription start
RcMYB18	CCG029787.1	24	64	TATA-box				core promoter element around -30 of transcription start
RcMYB18	CCG029787.1	59	99	TATA-box				core promoter element around -30 of transcription start
RcMYB18	CCG029787.1	225	265	TATA-box				core promoter element around -30 of transcription start
RcMYB18	CCG029787.1	226	266	TATA-box				core promoter element around -30 of transcription start
RcMYB18	CCG029787.1	227	267	TATA-box				core promoter element around -30 of transcription start
RcMYB18	CCG029787.1	228	268	TATA-box				core promoter element around -30 of transcription start
RcMYB18	CCG029787.1	359	399	TATA-box				core promoter element around -30 of transcription start
RcMYB18	CCG029787.1	360	400	TATA-box				core promoter element around -30 of transcription start
RcMYB18	CCG029787.1	361	401	TATA-box				core promoter element around -30 of transcription start
RcMYB18	CCG029787.1	362	402	TATA-box				core promoter element around -30 of transcription start
RcMYB18	CCG029787.1	365	405	TATA-box				core promoter element around -30 of transcription start
RcMYB18	CCG029787.1	366	406	TATA-box				core promoter element around -30 of transcription start
RcMYB18	CCG029787.1	367	407	TATA-box				core promoter element around -30 of transcription start
RcMYB18	CCG029787.1	464	504	TATA-box				core promoter element around -30 of transcription start
RcMYB18	CCG029787.1	465	505	TATA-box				core promoter element around -30 of transcription start
RcMYB18	CCG029787.1	466	506	TATA-box				core promoter element around -30 of transcription start
RcMYB18	CCG029787.1	533	573	TATA-box				core promoter element around -30 of transcription start
RcMYB18	CCG029787.1	934	974	TATA-box				core promoter element around -30 of transcription start
RcMYB18	CCG029787.1	935	975	TATA-box				core promoter element around -30 of transcription start
RcMYB18	CCG029787.1	1065	1105	TATA-box				core promoter element around -30 of transcription start
RcMYB18	CCG029787.1	1066	1106	TATA-box				core promoter element around -30 of transcription start
RcMYB18	CCG029787.1	1422	1462	TATA-box				core promoter element around -30 of transcription start
RcMYB18	CCG029787.1	1423	1463	TATA-box				core promoter element around -30 of transcription start
RcMYB18	CCG029787.1	1506	1546	TATA-box				core promoter element around -30 of transcription start
RcMYB18	CCG029787.1	1507	1547	TATA-box				core promoter element around -30 of transcription start
RcMYB18	CCG029787.1	1508	1548	TATA-box				core promoter element around -30 of transcription start
RcMYB18	CCG029787.1	1864	1904	TATA-box				core promoter element around -30 of transcription start
RcMYB18	CCG029787.1	1871	1911	TATA-box				core promoter element around -30 of transcription start
RcMYB18	CCG029787.1	1872	1912	TATA-box				core promoter element around -30 of transcription start
RcMYB18	CCG029787.1	1873	1913	TATA-box				core promoter element around -30 of transcription start
RcMYB18	CCG029787.1	1874	1914	TATA-box				core promoter element around -30 of transcription start
RcMYB18	CCG029787.1	1875	1915	TATA-box				core promoter element around -30 of transcription start
RcMYB18	CCG029787.1	1155	1195	TCT-motif				part of a light responsive element
RcMYB18	CCG029787.1	505	545	O2-site				cis-acting regulatory element involved in zein metabolism regulation
RcMYB18	CCG029787.1	1193	1233	G-Box				cis-acting regulatory element involved in light responsiveness
RcMYB18	CCG029787.1	290	330	ABRE				cis-acting element involved in the abscisic acid responsiveness
RcMYB18	CCG029787.1	589	629	ABRE				cis-acting element involved in the abscisic acid responsiveness
RcMYB18	CCG029787.1	1193	1233	ABRE				cis-acting element involved in the abscisic acid responsiveness
RcMYB18	CCG029787.1	1194	1234	ABRE				cis-acting element involved in the abscisic acid responsiveness
RcMYB18	CCG029787.1	444	484	MBS				MYB binding site involved in drought-inducibility
RcMYB18	CCG029787.1	579	619	MBS				MYB binding site involved in drought-inducibility
RcMYB18	CCG029787.1	922	962	MBS				MYB binding site involved in drought-inducibility
RcMYB18	CCG029787.1	1058	1098	MBS				MYB binding site involved in drought-inducibility
RcMYB18	CCG029787.1	589	629	G-box				cis-acting regulatory element involved in light responsiveness
RcMYB18	CCG029787.1	785	825	G-box				cis-acting regulatory element involved in light responsiveness
RcMYB18	CCG029787.1	1191	1231	G-box				cis-acting regulatory element involved in light responsiveness
RcMYB18	CCG029787.1	1193	1233	G-box				cis-acting regulatory element involved in light responsiveness
RcMYB18	CCG029787.1	814	854	CGTCA-motif				cis-acting regulatory element involved in the MeJA-responsiveness
RcMYB18	CCG029787.1	1318	1358	CGTCA-motif				cis-acting regulatory element involved in the MeJA-responsiveness
RcMYB18	CCG029787.1	338	378	GATA-motif				part of a light responsive element
RcMYB18	CCG029787.1	833	873	ARE				cis-acting regulatory element essential for the anaerobic induction
RcMYB18	CCG029787.1	896	936	ARE				cis-acting regulatory element essential for the anaerobic induction
RcMYB18	CCG029787.1	1263	1303	ARE				cis-acting regulatory element essential for the anaerobic induction
RcMYB18	CCG029787.1	1769	1809	GCN4_motif				cis-regulatory element involved in endosperm expression
RcMYB18	CCG029787.1	1155	1195	TC-rich repeats				cis-acting element involved in defense and stress responsiveness
RcMYB19	CCG020596.2	1822	1862	LTR				cis-acting element involved in low-temperature responsiveness
RcMYB19	CCG020596.2	1894	1934	LTR				cis-acting element involved in low-temperature responsiveness
RcMYB19	CCG020596.2	1540	1580	ABRE				cis-acting element involved in the abscisic acid responsiveness
RcMYB19	CCG020596.2	1050	1090	Box 4				part of a conserved DNA module involved in light responsiveness
RcMYB19	CCG020596.2	1137	1177	Box 4				part of a conserved DNA module involved in light responsiveness
RcMYB19	CCG020596.2	1673	1713	Box 4				part of a conserved DNA module involved in light responsiveness
RcMYB19	CCG020596.2	1545	1585	CAT-box				cis-acting regulatory element related to meristem expression
RcMYB19	CCG020596.2	1069	1109	TATA-box				core promoter element around -30 of transcription start
RcMYB19	CCG020596.2	1070	1110	TATA-box				core promoter element around -30 of transcription start
RcMYB19	CCG020596.2	1071	1111	TATA-box				core promoter element around -30 of transcription start
RcMYB19	CCG020596.2	1072	1112	TATA-box				core promoter element around -30 of transcription start
RcMYB19	CCG020596.2	1078	1118	TATA-box				core promoter element around -30 of transcription start
RcMYB19	CCG020596.2	1083	1123	TATA-box				core promoter element around -30 of transcription start
RcMYB19	CCG020596.2	1084	1124	TATA-box				core promoter element around -30 of transcription start
RcMYB19	CCG020596.2	1085	1125	TATA-box				core promoter element around -30 of transcription start
RcMYB19	CCG020596.2	1086	1126	TATA-box				core promoter element around -30 of transcription start
RcMYB19	CCG020596.2	1088	1128	TATA-box				core promoter element around -30 of transcription start
RcMYB19	CCG020596.2	1090	1130	TATA-box				core promoter element around -30 of transcription start
RcMYB19	CCG020596.2	1096	1136	TATA-box				core promoter element around -30 of transcription start
RcMYB19	CCG020596.2	1097	1137	TATA-box				core promoter element around -30 of transcription start
RcMYB19	CCG020596.2	1100	1140	TATA-box				core promoter element around -30 of transcription start
RcMYB19	CCG020596.2	1101	1141	TATA-box				core promoter element around -30 of transcription start
RcMYB19	CCG020596.2	1102	1142	TATA-box				core promoter element around -30 of transcription start
RcMYB19	CCG020596.2	1104	1144	TATA-box				core promoter element around -30 of transcription start
RcMYB19	CCG020596.2	1162	1202	TATA-box				core promoter element around -30 of transcription start
RcMYB19	CCG020596.2	1200	1240	TATA-box				core promoter element around -30 of transcription start
RcMYB19	CCG020596.2	1206	1246	TATA-box				core promoter element around -30 of transcription start
RcMYB19	CCG020596.2	1207	1247	TATA-box				core promoter element around -30 of transcription start
RcMYB19	CCG020596.2	1208	1248	TATA-box				core promoter element around -30 of transcription start
RcMYB19	CCG020596.2	1209	1249	TATA-box				core promoter element around -30 of transcription start
RcMYB19	CCG020596.2	1214	1254	TATA-box				core promoter element around -30 of transcription start
RcMYB19	CCG020596.2	1215	1255	TATA-box				core promoter element around -30 of transcription start
RcMYB19	CCG020596.2	1216	1256	TATA-box				core promoter element around -30 of transcription start
RcMYB19	CCG020596.2	1217	1257	TATA-box				core promoter element around -30 of transcription start
RcMYB19	CCG020596.2	1249	1289	TATA-box				core promoter element around -30 of transcription start
RcMYB19	CCG020596.2	1250	1290	TATA-box				core promoter element around -30 of transcription start
RcMYB19	CCG020596.2	1307	1347	TATA-box				core promoter element around -30 of transcription start
RcMYB19	CCG020596.2	1308	1348	TATA-box				core promoter element around -30 of transcription start
RcMYB19	CCG020596.2	1463	1503	TATA-box				core promoter element around -30 of transcription start
RcMYB19	CCG020596.2	1130	1170	CAAT-box				common cis-acting element in promoter and enhancer regions
RcMYB19	CCG020596.2	1173	1213	CAAT-box				common cis-acting element in promoter and enhancer regions
RcMYB19	CCG020596.2	1221	1261	CAAT-box				common cis-acting element in promoter and enhancer regions
RcMYB19	CCG020596.2	1267	1307	CAAT-box				common cis-acting element in promoter and enhancer regions
RcMYB19	CCG020596.2	1269	1309	CAAT-box				common cis-acting element in promoter and enhancer regions
RcMYB19	CCG020596.2	1275	1315	CAAT-box				common cis-acting element in promoter and enhancer regions
RcMYB19	CCG020596.2	1624	1664	CAAT-box				common cis-acting element in promoter and enhancer regions
RcMYB19	CCG020596.2	1729	1769	CAAT-box				common cis-acting element in promoter and enhancer regions
RcMYB19	CCG020596.2	1757	1797	CAAT-box				common cis-acting element in promoter and enhancer regions
RcMYB19	CCG020596.2	1902	1942	CAAT-box				common cis-acting element in promoter and enhancer regions
RcMYB19	CCG020596.2	1909	1949	CAAT-box				common cis-acting element in promoter and enhancer regions
RcMYB19	CCG020596.2	1357	1397	TGA-element				auxin-responsive element
RcMYB19	CCG020596.2	1539	1579	G-box				cis-acting regulatory element involved in light responsiveness
RcMYB20	CCG024278.1	1473	1513	TCA-element				cis-acting element involved in salicylic acid responsiveness
RcMYB20	CCG024278.1	1017	1057	ARE				cis-acting regulatory element essential for the anaerobic induction
RcMYB20	CCG024278.1	1271	1311	ARE				cis-acting regulatory element essential for the anaerobic induction
RcMYB20	CCG024278.1	1726	1766	ARE				cis-acting regulatory element essential for the anaerobic induction
RcMYB20	CCG024278.1	0	40	TC-rich repeats				cis-acting element involved in defense and stress responsiveness
RcMYB20	CCG024278.1	1629	1669	GATA-motif				part of a light responsive element
RcMYB20	CCG024278.1	466	506	CGTCA-motif				cis-acting regulatory element involved in the MeJA-responsiveness
RcMYB20	CCG024278.1	1004	1044	CGTCA-motif				cis-acting regulatory element involved in the MeJA-responsiveness
RcMYB20	CCG024278.1	1293	1333	CGTCA-motif				cis-acting regulatory element involved in the MeJA-responsiveness
RcMYB20	CCG024278.1	1972	2012	CGTCA-motif				cis-acting regulatory element involved in the MeJA-responsiveness
RcMYB20	CCG024278.1	1319	1359	LTR				cis-acting element involved in low-temperature responsiveness
RcMYB20	CCG024278.1	1355	1395	A-box				cis-acting regulatory element
RcMYB20	CCG024278.1	509	549	CCAAT-box				MYBHv1 binding site
RcMYB20	CCG024278.1	283	323	Box 4				part of a conserved DNA module involved in light responsiveness
RcMYB20	CCG024278.1	1161	1201	Box 4				part of a conserved DNA module involved in light responsiveness
RcMYB20	CCG024278.1	1450	1490	Box 4				part of a conserved DNA module involved in light responsiveness
RcMYB20	CCG024278.1	466	506	TGACG-motif				cis-acting regulatory element involved in the MeJA-responsiveness
RcMYB20	CCG024278.1	1004	1044	TGACG-motif				cis-acting regulatory element involved in the MeJA-responsiveness
RcMYB20	CCG024278.1	1293	1333	TGACG-motif				cis-acting regulatory element involved in the MeJA-responsiveness
RcMYB20	CCG024278.1	1972	2012	TGACG-motif				cis-acting regulatory element involved in the MeJA-responsiveness
RcMYB20	CCG024278.1	1146	1186	CAT-box				cis-acting regulatory element related to meristem expression
RcMYB20	CCG024278.1	298	338	TATA-box				core promoter element around -30 of transcription start
RcMYB20	CCG024278.1	300	340	TATA-box				core promoter element around -30 of transcription start
RcMYB20	CCG024278.1	367	407	TATA-box				core promoter element around -30 of transcription start
RcMYB20	CCG024278.1	368	408	TATA-box				core promoter element around -30 of transcription start
RcMYB20	CCG024278.1	422	462	TATA-box				core promoter element around -30 of transcription start
RcMYB20	CCG024278.1	423	463	TATA-box				core promoter element around -30 of transcription start
RcMYB20	CCG024278.1	424	464	TATA-box				core promoter element around -30 of transcription start
RcMYB20	CCG024278.1	517	557	TATA-box				core promoter element around -30 of transcription start
RcMYB20	CCG024278.1	571	611	TATA-box				core promoter element around -30 of transcription start
RcMYB20	CCG024278.1	589	629	TATA-box				core promoter element around -30 of transcription start
RcMYB20	CCG024278.1	591	631	TATA-box				core promoter element around -30 of transcription start
RcMYB20	CCG024278.1	698	738	TATA-box				core promoter element around -30 of transcription start
RcMYB20	CCG024278.1	716	756	TATA-box				core promoter element around -30 of transcription start
RcMYB20	CCG024278.1	718	758	TATA-box				core promoter element around -30 of transcription start
RcMYB20	CCG024278.1	865	905	TATA-box				core promoter element around -30 of transcription start
RcMYB20	CCG024278.1	866	906	TATA-box				core promoter element around -30 of transcription start
RcMYB20	CCG024278.1	915	955	TATA-box				core promoter element around -30 of transcription start
RcMYB20	CCG024278.1	916	956	TATA-box				core promoter element around -30 of transcription start
RcMYB20	CCG024278.1	917	957	TATA-box				core promoter element around -30 of transcription start
RcMYB20	CCG024278.1	918	958	TATA-box				core promoter element around -30 of transcription start
RcMYB20	CCG024278.1	986	1026	TATA-box				core promoter element around -30 of transcription start
RcMYB20	CCG024278.1	987	1027	TATA-box				core promoter element around -30 of transcription start
RcMYB20	CCG024278.1	988	1028	TATA-box				core promoter element around -30 of transcription start
RcMYB20	CCG024278.1	1039	1079	TATA-box				core promoter element around -30 of transcription start
RcMYB20	CCG024278.1	1040	1080	TATA-box				core promoter element around -30 of transcription start
RcMYB20	CCG024278.1	1041	1081	TATA-box				core promoter element around -30 of transcription start
RcMYB20	CCG024278.1	1045	1085	TATA-box				core promoter element around -30 of transcription start
RcMYB20	CCG024278.1	1046	1086	TATA-box				core promoter element around -30 of transcription start
RcMYB20	CCG024278.1	1047	1087	TATA-box				core promoter element around -30 of transcription start
RcMYB20	CCG024278.1	1048	1088	TATA-box				core promoter element around -30 of transcription start
RcMYB20	CCG024278.1	1253	1293	TATA-box				core promoter element around -30 of transcription start
RcMYB20	CCG024278.1	1254	1294	TATA-box				core promoter element around -30 of transcription start
RcMYB20	CCG024278.1	1304	1344	TATA-box				core promoter element around -30 of transcription start
RcMYB20	CCG024278.1	1305	1345	TATA-box				core promoter element around -30 of transcription start
RcMYB20	CCG024278.1	1306	1346	TATA-box				core promoter element around -30 of transcription start
RcMYB20	CCG024278.1	1307	1347	TATA-box				core promoter element around -30 of transcription start
RcMYB20	CCG024278.1	1329	1369	TATA-box				core promoter element around -30 of transcription start
RcMYB20	CCG024278.1	1330	1370	TATA-box				core promoter element around -30 of transcription start
RcMYB20	CCG024278.1	1331	1371	TATA-box				core promoter element around -30 of transcription start
RcMYB20	CCG024278.1	1332	1372	TATA-box				core promoter element around -30 of transcription start
RcMYB20	CCG024278.1	1400	1440	TATA-box				core promoter element around -30 of transcription start
RcMYB20	CCG024278.1	1464	1504	TATA-box				core promoter element around -30 of transcription start
RcMYB20	CCG024278.1	1515	1555	TATA-box				core promoter element around -30 of transcription start
RcMYB20	CCG024278.1	1516	1556	TATA-box				core promoter element around -30 of transcription start
RcMYB20	CCG024278.1	1517	1557	TATA-box				core promoter element around -30 of transcription start
RcMYB20	CCG024278.1	1548	1588	TATA-box				core promoter element around -30 of transcription start
RcMYB20	CCG024278.1	1549	1589	TATA-box				core promoter element around -30 of transcription start
RcMYB20	CCG024278.1	1550	1590	TATA-box				core promoter element around -30 of transcription start
RcMYB20	CCG024278.1	1687	1727	TATA-box				core promoter element around -30 of transcription start
RcMYB20	CCG024278.1	1688	1728	TATA-box				core promoter element around -30 of transcription start
RcMYB20	CCG024278.1	1689	1729	TATA-box				core promoter element around -30 of transcription start
RcMYB20	CCG024278.1	1690	1730	TATA-box				core promoter element around -30 of transcription start
RcMYB20	CCG024278.1	1900	1940	TATA-box				core promoter element around -30 of transcription start
RcMYB20	CCG024278.1	1901	1941	TATA-box				core promoter element around -30 of transcription start
RcMYB20	CCG024278.1	1902	1942	TATA-box				core promoter element around -30 of transcription start
RcMYB20	CCG024278.1	1903	1943	TATA-box				core promoter element around -30 of transcription start
RcMYB20	CCG024278.1	1904	1944	TATA-box				core promoter element around -30 of transcription start
RcMYB20	CCG024278.1	1906	1946	TATA-box				core promoter element around -30 of transcription start
RcMYB20	CCG024278.1	1919	1959	TATA-box				core promoter element around -30 of transcription start
RcMYB20	CCG024278.1	1920	1960	TATA-box				core promoter element around -30 of transcription start
RcMYB20	CCG024278.1	1931	1971	TATA-box				core promoter element around -30 of transcription start
RcMYB20	CCG024278.1	1932	1972	TATA-box				core promoter element around -30 of transcription start
RcMYB20	CCG024278.1	1933	1973	TATA-box				core promoter element around -30 of transcription start
RcMYB20	CCG024278.1	1963	2003	TATA-box				core promoter element around -30 of transcription start
RcMYB20	CCG024278.1	33	73	GT1-motif				light responsive element
RcMYB20	CCG024278.1	65	105	CAAT-box				common cis-acting element in promoter and enhancer regions
RcMYB20	CCG024278.1	529	569	CAAT-box				common cis-acting element in promoter and enhancer regions
RcMYB20	CCG024278.1	661	701	CAAT-box				common cis-acting element in promoter and enhancer regions
RcMYB20	CCG024278.1	817	857	CAAT-box				common cis-acting element in promoter and enhancer regions
RcMYB20	CCG024278.1	857	897	CAAT-box				common cis-acting element in promoter and enhancer regions
RcMYB20	CCG024278.1	889	929	CAAT-box				common cis-acting element in promoter and enhancer regions
RcMYB20	CCG024278.1	943	983	CAAT-box				common cis-acting element in promoter and enhancer regions
RcMYB20	CCG024278.1	1081	1121	CAAT-box				common cis-acting element in promoter and enhancer regions
RcMYB20	CCG024278.1	1100	1140	CAAT-box				common cis-acting element in promoter and enhancer regions
RcMYB20	CCG024278.1	1135	1175	CAAT-box				common cis-acting element in promoter and enhancer regions
RcMYB20	CCG024278.1	1237	1277	CAAT-box				common cis-acting element in promoter and enhancer regions
RcMYB20	CCG024278.1	1360	1400	CAAT-box				common cis-acting element in promoter and enhancer regions
RcMYB20	CCG024278.1	1569	1609	CAAT-box				common cis-acting element in promoter and enhancer regions
RcMYB20	CCG024278.1	1696	1736	CAAT-box				common cis-acting element in promoter and enhancer regions
RcMYB20	CCG024278.1	1967	2007	CAAT-box				common cis-acting element in promoter and enhancer regions
RcMYB20	CCG024278.1	583	623	I-box				part of a light responsive element
RcMYB20	CCG024278.1	710	750	I-box				part of a light responsive element
RcMYB20	CCG024278.1	129	169	AE-box				part of a module for light response
RcMYB21	CCG021132.1	178	218	ARE				cis-acting regulatory element essential for the anaerobic induction
RcMYB21	CCG021132.1	598	638	ARE				cis-acting regulatory element essential for the anaerobic induction
RcMYB21	CCG021132.1	737	777	ARE				cis-acting regulatory element essential for the anaerobic induction
RcMYB21	CCG021132.1	940	980	ARE				cis-acting regulatory element essential for the anaerobic induction
RcMYB21	CCG021132.1	1047	1087	ARE				cis-acting regulatory element essential for the anaerobic induction
RcMYB21	CCG021132.1	761	801	G-box				cis-acting regulatory element involved in light responsiveness
RcMYB21	CCG021132.1	811	851	G-box				cis-acting regulatory element involved in light responsiveness
RcMYB21	CCG021132.1	719	759	CGTCA-motif				cis-acting regulatory element involved in the MeJA-responsiveness
RcMYB21	CCG021132.1	765	805	CGTCA-motif				cis-acting regulatory element involved in the MeJA-responsiveness
RcMYB21	CCG021132.1	762	802	ABRE				cis-acting element involved in the abscisic acid responsiveness
RcMYB21	CCG021132.1	1581	1621	ABRE				cis-acting element involved in the abscisic acid responsiveness
RcMYB21	CCG021132.1	1442	1482	O2-site				cis-acting regulatory element involved in zein metabolism regulation
RcMYB21	CCG021132.1	13	53	TATA-box				core promoter element around -30 of transcription start
RcMYB21	CCG021132.1	15	55	TATA-box				core promoter element around -30 of transcription start
RcMYB21	CCG021132.1	36	76	TATA-box				core promoter element around -30 of transcription start
RcMYB21	CCG021132.1	37	77	TATA-box				core promoter element around -30 of transcription start
RcMYB21	CCG021132.1	38	78	TATA-box				core promoter element around -30 of transcription start
RcMYB21	CCG021132.1	43	83	TATA-box				core promoter element around -30 of transcription start
RcMYB21	CCG021132.1	45	85	TATA-box				core promoter element around -30 of transcription start
RcMYB21	CCG021132.1	46	86	TATA-box				core promoter element around -30 of transcription start
RcMYB21	CCG021132.1	47	87	TATA-box				core promoter element around -30 of transcription start
RcMYB21	CCG021132.1	95	135	TATA-box				core promoter element around -30 of transcription start
RcMYB21	CCG021132.1	193	233	TATA-box				core promoter element around -30 of transcription start
RcMYB21	CCG021132.1	194	234	TATA-box				core promoter element around -30 of transcription start
RcMYB21	CCG021132.1	195	235	TATA-box				core promoter element around -30 of transcription start
RcMYB21	CCG021132.1	260	300	TATA-box				core promoter element around -30 of transcription start
RcMYB21	CCG021132.1	262	302	TATA-box				core promoter element around -30 of transcription start
RcMYB21	CCG021132.1	373	413	TATA-box				core promoter element around -30 of transcription start
RcMYB21	CCG021132.1	374	414	TATA-box				core promoter element around -30 of transcription start
RcMYB21	CCG021132.1	413	453	TATA-box				core promoter element around -30 of transcription start
RcMYB21	CCG021132.1	414	454	TATA-box				core promoter element around -30 of transcription start
RcMYB21	CCG021132.1	486	526	TATA-box				core promoter element around -30 of transcription start
RcMYB21	CCG021132.1	517	557	TATA-box				core promoter element around -30 of transcription start
RcMYB21	CCG021132.1	620	660	TATA-box				core promoter element around -30 of transcription start
RcMYB21	CCG021132.1	676	716	TATA-box				core promoter element around -30 of transcription start
RcMYB21	CCG021132.1	677	717	TATA-box				core promoter element around -30 of transcription start
RcMYB21	CCG021132.1	893	933	TATA-box				core promoter element around -30 of transcription start
RcMYB21	CCG021132.1	894	934	TATA-box				core promoter element around -30 of transcription start
RcMYB21	CCG021132.1	895	935	TATA-box				core promoter element around -30 of transcription start
RcMYB21	CCG021132.1	1050	1090	TATA-box				core promoter element around -30 of transcription start
RcMYB21	CCG021132.1	1158	1198	TATA-box				core promoter element around -30 of transcription start
RcMYB21	CCG021132.1	1159	1199	TATA-box				core promoter element around -30 of transcription start
RcMYB21	CCG021132.1	1207	1247	TATA-box				core promoter element around -30 of transcription start
RcMYB21	CCG021132.1	1208	1248	TATA-box				core promoter element around -30 of transcription start
RcMYB21	CCG021132.1	1209	1249	TATA-box				core promoter element around -30 of transcription start
RcMYB21	CCG021132.1	1261	1301	TATA-box				core promoter element around -30 of transcription start
RcMYB21	CCG021132.1	1262	1302	TATA-box				core promoter element around -30 of transcription start
RcMYB21	CCG021132.1	1263	1303	TATA-box				core promoter element around -30 of transcription start
RcMYB21	CCG021132.1	1264	1304	TATA-box				core promoter element around -30 of transcription start
RcMYB21	CCG021132.1	1265	1305	TATA-box				core promoter element around -30 of transcription start
RcMYB21	CCG021132.1	1321	1361	TATA-box				core promoter element around -30 of transcription start
RcMYB21	CCG021132.1	1322	1362	TATA-box				core promoter element around -30 of transcription start
RcMYB21	CCG021132.1	1549	1589	TATA-box				core promoter element around -30 of transcription start
RcMYB21	CCG021132.1	1551	1591	TATA-box				core promoter element around -30 of transcription start
RcMYB21	CCG021132.1	1666	1706	TATA-box				core promoter element around -30 of transcription start
RcMYB21	CCG021132.1	1672	1712	TATA-box				core promoter element around -30 of transcription start
RcMYB21	CCG021132.1	1673	1713	TATA-box				core promoter element around -30 of transcription start
RcMYB21	CCG021132.1	1762	1802	TATA-box				core promoter element around -30 of transcription start
RcMYB21	CCG021132.1	1763	1803	TATA-box				core promoter element around -30 of transcription start
RcMYB21	CCG021132.1	1764	1804	TATA-box				core promoter element around -30 of transcription start
RcMYB21	CCG021132.1	1848	1888	TATA-box				core promoter element around -30 of transcription start
RcMYB21	CCG021132.1	1849	1889	TATA-box				core promoter element around -30 of transcription start
RcMYB21	CCG021132.1	1851	1891	TATA-box				core promoter element around -30 of transcription start
RcMYB21	CCG021132.1	883	923	TCT-motif				part of a light responsive element
RcMYB21	CCG021132.1	989	1029	TCT-motif				part of a light responsive element
RcMYB21	CCG021132.1	1967	2007	TCT-motif				part of a light responsive element
RcMYB21	CCG021132.1	1145	1185	GT1-motif				light responsive element
RcMYB21	CCG021132.1	54	94	CAAT-box				common cis-acting element in promoter and enhancer regions
RcMYB21	CCG021132.1	63	103	CAAT-box				common cis-acting element in promoter and enhancer regions
RcMYB21	CCG021132.1	156	196	CAAT-box				common cis-acting element in promoter and enhancer regions
RcMYB21	CCG021132.1	181	221	CAAT-box				common cis-acting element in promoter and enhancer regions
RcMYB21	CCG021132.1	420	460	CAAT-box				common cis-acting element in promoter and enhancer regions
RcMYB21	CCG021132.1	495	535	CAAT-box				common cis-acting element in promoter and enhancer regions
RcMYB21	CCG021132.1	593	633	CAAT-box				common cis-acting element in promoter and enhancer regions
RcMYB21	CCG021132.1	699	739	CAAT-box				common cis-acting element in promoter and enhancer regions
RcMYB21	CCG021132.1	818	858	CAAT-box				common cis-acting element in promoter and enhancer regions
RcMYB21	CCG021132.1	1067	1107	CAAT-box				common cis-acting element in promoter and enhancer regions
RcMYB21	CCG021132.1	1172	1212	CAAT-box				common cis-acting element in promoter and enhancer regions
RcMYB21	CCG021132.1	1511	1551	CAAT-box				common cis-acting element in promoter and enhancer regions
RcMYB21	CCG021132.1	1659	1699	CAAT-box				common cis-acting element in promoter and enhancer regions
RcMYB21	CCG021132.1	1700	1740	CAAT-box				common cis-acting element in promoter and enhancer regions
RcMYB21	CCG021132.1	719	759	TGACG-motif				cis-acting regulatory element involved in the MeJA-responsiveness
RcMYB21	CCG021132.1	765	805	TGACG-motif				cis-acting regulatory element involved in the MeJA-responsiveness
RcMYB21	CCG021132.1	1113	1153	Box 4				part of a conserved DNA module involved in light responsiveness
RcMYB21	CCG021132.1	1250	1290	Box 4				part of a conserved DNA module involved in light responsiveness
RcMYB22	CCG025512.1	1721	1761	ARE				cis-acting regulatory element essential for the anaerobic induction
RcMYB22	CCG025512.1	1683	1723	CGTCA-motif				cis-acting regulatory element involved in the MeJA-responsiveness
RcMYB22	CCG025512.1	703	743	G-box				cis-acting regulatory element involved in light responsiveness
RcMYB22	CCG025512.1	837	877	G-box				cis-acting regulatory element involved in light responsiveness
RcMYB22	CCG025512.1	907	947	G-box				cis-acting regulatory element involved in light responsiveness
RcMYB22	CCG025512.1	908	948	G-box				cis-acting regulatory element involved in light responsiveness
RcMYB22	CCG025512.1	1351	1391	G-box				cis-acting regulatory element involved in light responsiveness
RcMYB22	CCG025512.1	788	828	GATA-motif				part of a light responsive element
RcMYB22	CCG025512.1	704	744	ABRE				cis-acting element involved in the abscisic acid responsiveness
RcMYB22	CCG025512.1	909	949	ABRE				cis-acting element involved in the abscisic acid responsiveness
RcMYB22	CCG025512.1	1351	1391	ABRE				cis-acting element involved in the abscisic acid responsiveness
RcMYB22	CCG025512.1	1707	1747	ABRE				cis-acting element involved in the abscisic acid responsiveness
RcMYB22	CCG025512.1	1709	1749	ABRE				cis-acting element involved in the abscisic acid responsiveness
RcMYB22	CCG025512.1	1709	1749	G-Box				cis-acting regulatory element involved in light responsiveness
RcMYB22	CCG025512.1	0	40	CAAT-box				common cis-acting element in promoter and enhancer regions
RcMYB22	CCG025512.1	73	113	CAAT-box				common cis-acting element in promoter and enhancer regions
RcMYB22	CCG025512.1	131	171	CAAT-box				common cis-acting element in promoter and enhancer regions
RcMYB22	CCG025512.1	165	205	CAAT-box				common cis-acting element in promoter and enhancer regions
RcMYB22	CCG025512.1	176	216	CAAT-box				common cis-acting element in promoter and enhancer regions
RcMYB22	CCG025512.1	297	337	CAAT-box				common cis-acting element in promoter and enhancer regions
RcMYB22	CCG025512.1	443	483	CAAT-box				common cis-acting element in promoter and enhancer regions
RcMYB22	CCG025512.1	526	566	CAAT-box				common cis-acting element in promoter and enhancer regions
RcMYB22	CCG025512.1	656	696	CAAT-box				common cis-acting element in promoter and enhancer regions
RcMYB22	CCG025512.1	862	902	CAAT-box				common cis-acting element in promoter and enhancer regions
RcMYB22	CCG025512.1	924	964	CAAT-box				common cis-acting element in promoter and enhancer regions
RcMYB22	CCG025512.1	979	1019	CAAT-box				common cis-acting element in promoter and enhancer regions
RcMYB22	CCG025512.1	1033	1073	CAAT-box				common cis-acting element in promoter and enhancer regions
RcMYB22	CCG025512.1	1080	1120	CAAT-box				common cis-acting element in promoter and enhancer regions
RcMYB22	CCG025512.1	1097	1137	CAAT-box				common cis-acting element in promoter and enhancer regions
RcMYB22	CCG025512.1	1301	1341	CAAT-box				common cis-acting element in promoter and enhancer regions
RcMYB22	CCG025512.1	1551	1591	CAAT-box				common cis-acting element in promoter and enhancer regions
RcMYB22	CCG025512.1	1592	1632	CAAT-box				common cis-acting element in promoter and enhancer regions
RcMYB22	CCG025512.1	1760	1800	CAAT-box				common cis-acting element in promoter and enhancer regions
RcMYB22	CCG025512.1	1812	1852	CAAT-box				common cis-acting element in promoter and enhancer regions
RcMYB22	CCG025512.1	1240	1280	GT1-motif				light responsive element
RcMYB22	CCG025512.1	19	59	TATA-box				core promoter element around -30 of transcription start
RcMYB22	CCG025512.1	20	60	TATA-box				core promoter element around -30 of transcription start
RcMYB22	CCG025512.1	21	61	TATA-box				core promoter element around -30 of transcription start
RcMYB22	CCG025512.1	22	62	TATA-box				core promoter element around -30 of transcription start
RcMYB22	CCG025512.1	23	63	TATA-box				core promoter element around -30 of transcription start
RcMYB22	CCG025512.1	144	184	TATA-box				core promoter element around -30 of transcription start
RcMYB22	CCG025512.1	145	185	TATA-box				core promoter element around -30 of transcription start
RcMYB22	CCG025512.1	146	186	TATA-box				core promoter element around -30 of transcription start
RcMYB22	CCG025512.1	208	248	TATA-box				core promoter element around -30 of transcription start
RcMYB22	CCG025512.1	214	254	TATA-box				core promoter element around -30 of transcription start
RcMYB22	CCG025512.1	215	255	TATA-box				core promoter element around -30 of transcription start
RcMYB22	CCG025512.1	216	256	TATA-box				core promoter element around -30 of transcription start
RcMYB22	CCG025512.1	217	257	TATA-box				core promoter element around -30 of transcription start
RcMYB22	CCG025512.1	218	258	TATA-box				core promoter element around -30 of transcription start
RcMYB22	CCG025512.1	251	291	TATA-box				core promoter element around -30 of transcription start
RcMYB22	CCG025512.1	252	292	TATA-box				core promoter element around -30 of transcription start
RcMYB22	CCG025512.1	253	293	TATA-box				core promoter element around -30 of transcription start
RcMYB22	CCG025512.1	502	542	TATA-box				core promoter element around -30 of transcription start
RcMYB22	CCG025512.1	503	543	TATA-box				core promoter element around -30 of transcription start
RcMYB22	CCG025512.1	504	544	TATA-box				core promoter element around -30 of transcription start
RcMYB22	CCG025512.1	505	545	TATA-box				core promoter element around -30 of transcription start
RcMYB22	CCG025512.1	507	547	TATA-box				core promoter element around -30 of transcription start
RcMYB22	CCG025512.1	592	632	TATA-box				core promoter element around -30 of transcription start
RcMYB22	CCG025512.1	634	674	TATA-box				core promoter element around -30 of transcription start
RcMYB22	CCG025512.1	635	675	TATA-box				core promoter element around -30 of transcription start
RcMYB22	CCG025512.1	668	708	TATA-box				core promoter element around -30 of transcription start
RcMYB22	CCG025512.1	670	710	TATA-box				core promoter element around -30 of transcription start
RcMYB22	CCG025512.1	721	761	TATA-box				core promoter element around -30 of transcription start
RcMYB22	CCG025512.1	1161	1201	TATA-box				core promoter element around -30 of transcription start
RcMYB22	CCG025512.1	1163	1203	TATA-box				core promoter element around -30 of transcription start
RcMYB22	CCG025512.1	1193	1233	TATA-box				core promoter element around -30 of transcription start
RcMYB22	CCG025512.1	1194	1234	TATA-box				core promoter element around -30 of transcription start
RcMYB22	CCG025512.1	1195	1235	TATA-box				core promoter element around -30 of transcription start
RcMYB22	CCG025512.1	1247	1287	TATA-box				core promoter element around -30 of transcription start
RcMYB22	CCG025512.1	1248	1288	TATA-box				core promoter element around -30 of transcription start
RcMYB22	CCG025512.1	1251	1291	TATA-box				core promoter element around -30 of transcription start
RcMYB22	CCG025512.1	1252	1292	TATA-box				core promoter element around -30 of transcription start
RcMYB22	CCG025512.1	1253	1293	TATA-box				core promoter element around -30 of transcription start
RcMYB22	CCG025512.1	1261	1301	TATA-box				core promoter element around -30 of transcription start
RcMYB22	CCG025512.1	1262	1302	TATA-box				core promoter element around -30 of transcription start
RcMYB22	CCG025512.1	1263	1303	TATA-box				core promoter element around -30 of transcription start
RcMYB22	CCG025512.1	1265	1305	TATA-box				core promoter element around -30 of transcription start
RcMYB22	CCG025512.1	1266	1306	TATA-box				core promoter element around -30 of transcription start
RcMYB22	CCG025512.1	1267	1307	TATA-box				core promoter element around -30 of transcription start
RcMYB22	CCG025512.1	1268	1308	TATA-box				core promoter element around -30 of transcription start
RcMYB22	CCG025512.1	1269	1309	TATA-box				core promoter element around -30 of transcription start
RcMYB22	CCG025512.1	1278	1318	TATA-box				core promoter element around -30 of transcription start
RcMYB22	CCG025512.1	1279	1319	TATA-box				core promoter element around -30 of transcription start
RcMYB22	CCG025512.1	1280	1320	TATA-box				core promoter element around -30 of transcription start
RcMYB22	CCG025512.1	1281	1321	TATA-box				core promoter element around -30 of transcription start
RcMYB22	CCG025512.1	1282	1322	TATA-box				core promoter element around -30 of transcription start
RcMYB22	CCG025512.1	1318	1358	TATA-box				core promoter element around -30 of transcription start
RcMYB22	CCG025512.1	1319	1359	TATA-box				core promoter element around -30 of transcription start
RcMYB22	CCG025512.1	1320	1360	TATA-box				core promoter element around -30 of transcription start
RcMYB22	CCG025512.1	1321	1361	TATA-box				core promoter element around -30 of transcription start
RcMYB22	CCG025512.1	1322	1362	TATA-box				core promoter element around -30 of transcription start
RcMYB22	CCG025512.1	1324	1364	TATA-box				core promoter element around -30 of transcription start
RcMYB22	CCG025512.1	1490	1530	TATA-box				core promoter element around -30 of transcription start
RcMYB22	CCG025512.1	1491	1531	TATA-box				core promoter element around -30 of transcription start
RcMYB22	CCG025512.1	1527	1567	TATA-box				core promoter element around -30 of transcription start
RcMYB22	CCG025512.1	1528	1568	TATA-box				core promoter element around -30 of transcription start
RcMYB22	CCG025512.1	1568	1608	TATA-box				core promoter element around -30 of transcription start
RcMYB22	CCG025512.1	1570	1610	TATA-box				core promoter element around -30 of transcription start
RcMYB22	CCG025512.1	1571	1611	TATA-box				core promoter element around -30 of transcription start
RcMYB22	CCG025512.1	1572	1612	TATA-box				core promoter element around -30 of transcription start
RcMYB22	CCG025512.1	1796	1836	TATA-box				core promoter element around -30 of transcription start
RcMYB22	CCG025512.1	1820	1860	TATA-box				core promoter element around -30 of transcription start
RcMYB22	CCG025512.1	1821	1861	TATA-box				core promoter element around -30 of transcription start
RcMYB22	CCG025512.1	1822	1862	TATA-box				core promoter element around -30 of transcription start
RcMYB22	CCG025512.1	1823	1863	TATA-box				core promoter element around -30 of transcription start
RcMYB22	CCG025512.1	1824	1864	TATA-box				core promoter element around -30 of transcription start
RcMYB22	CCG025512.1	1830	1870	TATA-box				core promoter element around -30 of transcription start
RcMYB22	CCG025512.1	1891	1931	TATA-box				core promoter element around -30 of transcription start
RcMYB22	CCG025512.1	1892	1932	TATA-box				core promoter element around -30 of transcription start
RcMYB22	CCG025512.1	1894	1934	TATA-box				core promoter element around -30 of transcription start
RcMYB22	CCG025512.1	812	852	TCT-motif				part of a light responsive element
RcMYB22	CCG025512.1	1181	1221	TCT-motif				part of a light responsive element
RcMYB22	CCG025512.1	1806	1846	I-box				part of a light responsive element
RcMYB22	CCG025512.1	139	179	LTR				cis-acting element involved in low-temperature responsiveness
RcMYB22	CCG025512.1	555	595	LTR				cis-acting element involved in low-temperature responsiveness
RcMYB22	CCG025512.1	613	653	Box 4				part of a conserved DNA module involved in light responsiveness
RcMYB22	CCG025512.1	1583	1623	Box 4				part of a conserved DNA module involved in light responsiveness
RcMYB22	CCG025512.1	1617	1657	Box 4				part of a conserved DNA module involved in light responsiveness
RcMYB22	CCG025512.1	1683	1723	TGACG-motif				cis-acting regulatory element involved in the MeJA-responsiveness
RcMYB23	CCG025998.1	672	712	G-Box				cis-acting regulatory element involved in light responsiveness
RcMYB23	CCG025998.1	859	899	G-Box				cis-acting regulatory element involved in light responsiveness
RcMYB23	CCG025998.1	1080	1120	TCA-element				cis-acting element involved in salicylic acid responsiveness
RcMYB23	CCG025998.1	672	712	ABRE				cis-acting element involved in the abscisic acid responsiveness
RcMYB23	CCG025998.1	860	900	ABRE				cis-acting element involved in the abscisic acid responsiveness
RcMYB23	CCG025998.1	829	869	G-box				cis-acting regulatory element involved in light responsiveness
RcMYB23	CCG025998.1	1447	1487	G-box				cis-acting regulatory element involved in light responsiveness
RcMYB23	CCG025998.1	808	848	TC-rich repeats				cis-acting element involved in defense and stress responsiveness
RcMYB23	CCG025998.1	1850	1890	ARE				cis-acting regulatory element essential for the anaerobic induction
RcMYB23	CCG025998.1	154	194	Box 4				part of a conserved DNA module involved in light responsiveness
RcMYB23	CCG025998.1	396	436	Box 4				part of a conserved DNA module involved in light responsiveness
RcMYB23	CCG025998.1	521	561	Box 4				part of a conserved DNA module involved in light responsiveness
RcMYB23	CCG025998.1	638	678	CCAAT-box				MYBHv1 binding site
RcMYB23	CCG025998.1	1869	1909	MRE				MYB binding site involved in light responsiveness
RcMYB23	CCG025998.1	815	855	TGA-element				auxin-responsive element
RcMYB23	CCG025998.1	1910	1950	I-box				part of a light responsive element
RcMYB23	CCG025998.1	123	163	TATA-box				core promoter element around -30 of transcription start
RcMYB23	CCG025998.1	124	164	TATA-box				core promoter element around -30 of transcription start
RcMYB23	CCG025998.1	299	339	TATA-box				core promoter element around -30 of transcription start
RcMYB23	CCG025998.1	345	385	TATA-box				core promoter element around -30 of transcription start
RcMYB23	CCG025998.1	431	471	TATA-box				core promoter element around -30 of transcription start
RcMYB23	CCG025998.1	432	472	TATA-box				core promoter element around -30 of transcription start
RcMYB23	CCG025998.1	437	477	TATA-box				core promoter element around -30 of transcription start
RcMYB23	CCG025998.1	438	478	TATA-box				core promoter element around -30 of transcription start
RcMYB23	CCG025998.1	490	530	TATA-box				core promoter element around -30 of transcription start
RcMYB23	CCG025998.1	491	531	TATA-box				core promoter element around -30 of transcription start
RcMYB23	CCG025998.1	492	532	TATA-box				core promoter element around -30 of transcription start
RcMYB23	CCG025998.1	493	533	TATA-box				core promoter element around -30 of transcription start
RcMYB23	CCG025998.1	622	662	TATA-box				core promoter element around -30 of transcription start
RcMYB23	CCG025998.1	623	663	TATA-box				core promoter element around -30 of transcription start
RcMYB23	CCG025998.1	645	685	TATA-box				core promoter element around -30 of transcription start
RcMYB23	CCG025998.1	646	686	TATA-box				core promoter element around -30 of transcription start
RcMYB23	CCG025998.1	655	695	TATA-box				core promoter element around -30 of transcription start
RcMYB23	CCG025998.1	657	697	TATA-box				core promoter element around -30 of transcription start
RcMYB23	CCG025998.1	663	703	TATA-box				core promoter element around -30 of transcription start
RcMYB23	CCG025998.1	804	844	TATA-box				core promoter element around -30 of transcription start
RcMYB23	CCG025998.1	969	1009	TATA-box				core promoter element around -30 of transcription start
RcMYB23	CCG025998.1	971	1011	TATA-box				core promoter element around -30 of transcription start
RcMYB23	CCG025998.1	976	1016	TATA-box				core promoter element around -30 of transcription start
RcMYB23	CCG025998.1	977	1017	TATA-box				core promoter element around -30 of transcription start
RcMYB23	CCG025998.1	987	1027	TATA-box				core promoter element around -30 of transcription start
RcMYB23	CCG025998.1	988	1028	TATA-box				core promoter element around -30 of transcription start
RcMYB23	CCG025998.1	989	1029	TATA-box				core promoter element around -30 of transcription start
RcMYB23	CCG025998.1	1171	1211	TATA-box				core promoter element around -30 of transcription start
RcMYB23	CCG025998.1	1172	1212	TATA-box				core promoter element around -30 of transcription start
RcMYB23	CCG025998.1	1173	1213	TATA-box				core promoter element around -30 of transcription start
RcMYB23	CCG025998.1	1327	1367	TATA-box				core promoter element around -30 of transcription start
RcMYB23	CCG025998.1	1461	1501	TATA-box				core promoter element around -30 of transcription start
RcMYB23	CCG025998.1	1462	1502	TATA-box				core promoter element around -30 of transcription start
RcMYB23	CCG025998.1	1463	1503	TATA-box				core promoter element around -30 of transcription start
RcMYB23	CCG025998.1	1669	1709	TATA-box				core promoter element around -30 of transcription start
RcMYB23	CCG025998.1	1670	1710	TATA-box				core promoter element around -30 of transcription start
RcMYB23	CCG025998.1	1716	1756	TATA-box				core promoter element around -30 of transcription start
RcMYB23	CCG025998.1	1718	1758	TATA-box				core promoter element around -30 of transcription start
RcMYB23	CCG025998.1	1734	1774	TATA-box				core promoter element around -30 of transcription start
RcMYB23	CCG025998.1	1736	1776	TATA-box				core promoter element around -30 of transcription start
RcMYB23	CCG025998.1	1862	1902	TATA-box				core promoter element around -30 of transcription start
RcMYB23	CCG025998.1	1864	1904	TATA-box				core promoter element around -30 of transcription start
RcMYB23	CCG025998.1	1517	1557	TCT-motif				part of a light responsive element
RcMYB23	CCG025998.1	1687	1727	TCT-motif				part of a light responsive element
RcMYB23	CCG025998.1	330	370	CAAT-box				common cis-acting element in promoter and enhancer regions
RcMYB23	CCG025998.1	566	606	CAAT-box				common cis-acting element in promoter and enhancer regions
RcMYB23	CCG025998.1	589	629	CAAT-box				common cis-acting element in promoter and enhancer regions
RcMYB23	CCG025998.1	692	732	CAAT-box				common cis-acting element in promoter and enhancer regions
RcMYB23	CCG025998.1	728	768	CAAT-box				common cis-acting element in promoter and enhancer regions
RcMYB23	CCG025998.1	851	891	CAAT-box				common cis-acting element in promoter and enhancer regions
RcMYB23	CCG025998.1	948	988	CAAT-box				common cis-acting element in promoter and enhancer regions
RcMYB23	CCG025998.1	1049	1089	CAAT-box				common cis-acting element in promoter and enhancer regions
RcMYB23	CCG025998.1	1296	1336	CAAT-box				common cis-acting element in promoter and enhancer regions
RcMYB23	CCG025998.1	1304	1344	CAAT-box				common cis-acting element in promoter and enhancer regions
RcMYB23	CCG025998.1	1316	1356	CAAT-box				common cis-acting element in promoter and enhancer regions
RcMYB23	CCG025998.1	1377	1417	CAAT-box				common cis-acting element in promoter and enhancer regions
RcMYB23	CCG025998.1	1411	1451	CAAT-box				common cis-acting element in promoter and enhancer regions
RcMYB23	CCG025998.1	1583	1623	CAAT-box				common cis-acting element in promoter and enhancer regions
RcMYB23	CCG025998.1	1605	1645	CAAT-box				common cis-acting element in promoter and enhancer regions
RcMYB23	CCG025998.1	1642	1682	CAAT-box				common cis-acting element in promoter and enhancer regions
RcMYB23	CCG025998.1	1712	1752	CAAT-box				common cis-acting element in promoter and enhancer regions
RcMYB23	CCG025998.1	1933	1973	CAAT-box				common cis-acting element in promoter and enhancer regions
RcMYB23	CCG025998.1	-2	38	GT1-motif				light responsive element
RcMYB24	CCG024972.1	321	361	TATA-box				core promoter element around -30 of transcription start
RcMYB24	CCG024972.1	554	594	TATA-box				core promoter element around -30 of transcription start
RcMYB24	CCG024972.1	598	638	TATA-box				core promoter element around -30 of transcription start
RcMYB24	CCG024972.1	599	639	TATA-box				core promoter element around -30 of transcription start
RcMYB24	CCG024972.1	600	640	TATA-box				core promoter element around -30 of transcription start
RcMYB24	CCG024972.1	1068	1108	TATA-box				core promoter element around -30 of transcription start
RcMYB24	CCG024972.1	1070	1110	TATA-box				core promoter element around -30 of transcription start
RcMYB24	CCG024972.1	1144	1184	TATA-box				core promoter element around -30 of transcription start
RcMYB24	CCG024972.1	1179	1219	TATA-box				core promoter element around -30 of transcription start
RcMYB24	CCG024972.1	1180	1220	TATA-box				core promoter element around -30 of transcription start
RcMYB24	CCG024972.1	1182	1222	TATA-box				core promoter element around -30 of transcription start
RcMYB24	CCG024972.1	1446	1486	TATA-box				core promoter element around -30 of transcription start
RcMYB24	CCG024972.1	1469	1509	TATA-box				core promoter element around -30 of transcription start
RcMYB24	CCG024972.1	1470	1510	TATA-box				core promoter element around -30 of transcription start
RcMYB24	CCG024972.1	1471	1511	TATA-box				core promoter element around -30 of transcription start
RcMYB24	CCG024972.1	1473	1513	TATA-box				core promoter element around -30 of transcription start
RcMYB24	CCG024972.1	1541	1581	TATA-box				core promoter element around -30 of transcription start
RcMYB24	CCG024972.1	1542	1582	TATA-box				core promoter element around -30 of transcription start
RcMYB24	CCG024972.1	1547	1587	TATA-box				core promoter element around -30 of transcription start
RcMYB24	CCG024972.1	1627	1667	TATA-box				core promoter element around -30 of transcription start
RcMYB24	CCG024972.1	1628	1668	TATA-box				core promoter element around -30 of transcription start
RcMYB24	CCG024972.1	1629	1669	TATA-box				core promoter element around -30 of transcription start
RcMYB24	CCG024972.1	1630	1670	TATA-box				core promoter element around -30 of transcription start
RcMYB24	CCG024972.1	1631	1671	TATA-box				core promoter element around -30 of transcription start
RcMYB24	CCG024972.1	1632	1672	TATA-box				core promoter element around -30 of transcription start
RcMYB24	CCG024972.1	1817	1857	TATA-box				core promoter element around -30 of transcription start
RcMYB24	CCG024972.1	1818	1858	TATA-box				core promoter element around -30 of transcription start
RcMYB24	CCG024972.1	1819	1859	TATA-box				core promoter element around -30 of transcription start
RcMYB24	CCG024972.1	1820	1860	TATA-box				core promoter element around -30 of transcription start
RcMYB24	CCG024972.1	1821	1861	TATA-box				core promoter element around -30 of transcription start
RcMYB24	CCG024972.1	1822	1862	TATA-box				core promoter element around -30 of transcription start
RcMYB24	CCG024972.1	1828	1868	TATA-box				core promoter element around -30 of transcription start
RcMYB24	CCG024972.1	1829	1869	TATA-box				core promoter element around -30 of transcription start
RcMYB24	CCG024972.1	1830	1870	TATA-box				core promoter element around -30 of transcription start
RcMYB24	CCG024972.1	1850	1890	TATA-box				core promoter element around -30 of transcription start
RcMYB24	CCG024972.1	1853	1893	TATA-box				core promoter element around -30 of transcription start
RcMYB24	CCG024972.1	1854	1894	TATA-box				core promoter element around -30 of transcription start
RcMYB24	CCG024972.1	122	162	GT1-motif				light responsive element
RcMYB24	CCG024972.1	494	534	GT1-motif				light responsive element
RcMYB24	CCG024972.1	177	217	CAAT-box				common cis-acting element in promoter and enhancer regions
RcMYB24	CCG024972.1	653	693	CAAT-box				common cis-acting element in promoter and enhancer regions
RcMYB24	CCG024972.1	886	926	CAAT-box				common cis-acting element in promoter and enhancer regions
RcMYB24	CCG024972.1	997	1037	CAAT-box				common cis-acting element in promoter and enhancer regions
RcMYB24	CCG024972.1	1035	1075	CAAT-box				common cis-acting element in promoter and enhancer regions
RcMYB24	CCG024972.1	1228	1268	CAAT-box				common cis-acting element in promoter and enhancer regions
RcMYB24	CCG024972.1	1299	1339	CAAT-box				common cis-acting element in promoter and enhancer regions
RcMYB24	CCG024972.1	1697	1737	CAAT-box				common cis-acting element in promoter and enhancer regions
RcMYB24	CCG024972.1	1904	1944	CAAT-box				common cis-acting element in promoter and enhancer regions
RcMYB24	CCG024972.1	1532	1572	TGA-element				auxin-responsive element
RcMYB24	CCG024972.1	1658	1698	TGA-element				auxin-responsive element
RcMYB24	CCG024972.1	166	206	LTR				cis-acting element involved in low-temperature responsiveness
RcMYB24	CCG024972.1	453	493	MRE				MYB binding site involved in light responsiveness
RcMYB24	CCG024972.1	458	498	MRE				MYB binding site involved in light responsiveness
RcMYB24	CCG024972.1	207	247	CCAAT-box				MYBHv1 binding site
RcMYB24	CCG024972.1	180	220	TGACG-motif				cis-acting regulatory element involved in the MeJA-responsiveness
RcMYB24	CCG024972.1	256	296	TGACG-motif				cis-acting regulatory element involved in the MeJA-responsiveness
RcMYB24	CCG024972.1	768	808	TGACG-motif				cis-acting regulatory element involved in the MeJA-responsiveness
RcMYB24	CCG024972.1	61	101	Box 4				part of a conserved DNA module involved in light responsiveness
RcMYB24	CCG024972.1	1786	1826	Box 4				part of a conserved DNA module involved in light responsiveness
RcMYB24	CCG024972.1	727	767	ARE				cis-acting regulatory element essential for the anaerobic induction
RcMYB24	CCG024972.1	1864	1904	ARE				cis-acting regulatory element essential for the anaerobic induction
RcMYB24	CCG024972.1	250	290	GATA-motif				part of a light responsive element
RcMYB24	CCG024972.1	279	319	G-box				cis-acting regulatory element involved in light responsiveness
RcMYB24	CCG024972.1	1064	1104	G-box				cis-acting regulatory element involved in light responsiveness
RcMYB24	CCG024972.1	180	220	CGTCA-motif				cis-acting regulatory element involved in the MeJA-responsiveness
RcMYB24	CCG024972.1	256	296	CGTCA-motif				cis-acting regulatory element involved in the MeJA-responsiveness
RcMYB24	CCG024972.1	768	808	CGTCA-motif				cis-acting regulatory element involved in the MeJA-responsiveness
RcMYB24	CCG024972.1	1064	1104	ABRE				cis-acting element involved in the abscisic acid responsiveness
RcMYB24	CCG024972.1	209	249	O2-site				cis-acting regulatory element involved in zein metabolism regulation
RcMYB25	CCG025206.1	32	72	CAAT-box				common cis-acting element in promoter and enhancer regions
RcMYB25	CCG025206.1	69	109	CAAT-box				common cis-acting element in promoter and enhancer regions
RcMYB25	CCG025206.1	785	825	CAAT-box				common cis-acting element in promoter and enhancer regions
RcMYB25	CCG025206.1	904	944	CAAT-box				common cis-acting element in promoter and enhancer regions
RcMYB25	CCG025206.1	1023	1063	CAAT-box				common cis-acting element in promoter and enhancer regions
RcMYB25	CCG025206.1	1030	1070	CAAT-box				common cis-acting element in promoter and enhancer regions
RcMYB25	CCG025206.1	1095	1135	CAAT-box				common cis-acting element in promoter and enhancer regions
RcMYB25	CCG025206.1	1210	1250	CAAT-box				common cis-acting element in promoter and enhancer regions
RcMYB25	CCG025206.1	1275	1315	CAAT-box				common cis-acting element in promoter and enhancer regions
RcMYB25	CCG025206.1	1778	1818	CAAT-box				common cis-acting element in promoter and enhancer regions
RcMYB25	CCG025206.1	1801	1841	CAAT-box				common cis-acting element in promoter and enhancer regions
RcMYB25	CCG025206.1	1935	1975	CAAT-box				common cis-acting element in promoter and enhancer regions
RcMYB25	CCG025206.1	512	552	TATA-box				core promoter element around -30 of transcription start
RcMYB25	CCG025206.1	576	616	TATA-box				core promoter element around -30 of transcription start
RcMYB25	CCG025206.1	577	617	TATA-box				core promoter element around -30 of transcription start
RcMYB25	CCG025206.1	598	638	TATA-box				core promoter element around -30 of transcription start
RcMYB25	CCG025206.1	599	639	TATA-box				core promoter element around -30 of transcription start
RcMYB25	CCG025206.1	811	851	TATA-box				core promoter element around -30 of transcription start
RcMYB25	CCG025206.1	812	852	TATA-box				core promoter element around -30 of transcription start
RcMYB25	CCG025206.1	814	854	TATA-box				core promoter element around -30 of transcription start
RcMYB25	CCG025206.1	855	895	TATA-box				core promoter element around -30 of transcription start
RcMYB25	CCG025206.1	856	896	TATA-box				core promoter element around -30 of transcription start
RcMYB25	CCG025206.1	867	907	TATA-box				core promoter element around -30 of transcription start
RcMYB25	CCG025206.1	868	908	TATA-box				core promoter element around -30 of transcription start
RcMYB25	CCG025206.1	869	909	TATA-box				core promoter element around -30 of transcription start
RcMYB25	CCG025206.1	1309	1349	TATA-box				core promoter element around -30 of transcription start
RcMYB25	CCG025206.1	1342	1382	TATA-box				core promoter element around -30 of transcription start
RcMYB25	CCG025206.1	1475	1515	TATA-box				core promoter element around -30 of transcription start
RcMYB25	CCG025206.1	1476	1516	TATA-box				core promoter element around -30 of transcription start
RcMYB25	CCG025206.1	1477	1517	TATA-box				core promoter element around -30 of transcription start
RcMYB25	CCG025206.1	1478	1518	TATA-box				core promoter element around -30 of transcription start
RcMYB25	CCG025206.1	1856	1896	TATA-box				core promoter element around -30 of transcription start
RcMYB25	CCG025206.1	1857	1897	TATA-box				core promoter element around -30 of transcription start
RcMYB25	CCG025206.1	1858	1898	TATA-box				core promoter element around -30 of transcription start
RcMYB25	CCG025206.1	1859	1899	TATA-box				core promoter element around -30 of transcription start
RcMYB25	CCG025206.1	1916	1956	TATA-box				core promoter element around -30 of transcription start
RcMYB25	CCG025206.1	1917	1957	TATA-box				core promoter element around -30 of transcription start
RcMYB25	CCG025206.1	1918	1958	TATA-box				core promoter element around -30 of transcription start
RcMYB25	CCG025206.1	205	245	TCT-motif				part of a light responsive element
RcMYB25	CCG025206.1	1469	1509	TCT-motif				part of a light responsive element
RcMYB25	CCG025206.1	956	996	AE-box				part of a module for light response
RcMYB25	CCG025206.1	647	687	TGA-element				auxin-responsive element
RcMYB25	CCG025206.1	1243	1283	CCAAT-box				MYBHv1 binding site
RcMYB25	CCG025206.1	373	413	LTR				cis-acting element involved in low-temperature responsiveness
RcMYB25	CCG025206.1	82	122	CAT-box				cis-acting regulatory element related to meristem expression
RcMYB25	CCG025206.1	1177	1217	ARE				cis-acting regulatory element essential for the anaerobic induction
RcMYB25	CCG025206.1	1651	1691	ARE				cis-acting regulatory element essential for the anaerobic induction
RcMYB25	CCG025206.1	728	768	G-box				cis-acting regulatory element involved in light responsiveness
RcMYB25	CCG025206.1	969	1009	G-box				cis-acting regulatory element involved in light responsiveness
RcMYB25	CCG025206.1	20	60	GATA-motif				part of a light responsive element
RcMYB25	CCG025206.1	850	890	ABRE				cis-acting element involved in the abscisic acid responsiveness
RcMYB25	CCG025206.1	969	1009	ABRE				cis-acting element involved in the abscisic acid responsiveness
RcMYB25	CCG025206.1	970	1010	ABRE				cis-acting element involved in the abscisic acid responsiveness
RcMYB25	CCG025206.1	232	272	TCA-element				cis-acting element involved in salicylic acid responsiveness
RcMYB25	CCG025206.1	658	698	O2-site				cis-acting regulatory element involved in zein metabolism regulation
RcMYB25	CCG025206.1	969	1009	G-Box				cis-acting regulatory element involved in light responsiveness
RcMYB25	CCG025206.1	1324	1364	G-Box				cis-acting regulatory element involved in light responsiveness
RcMYB26	CCG027619.1	1742	1782	ARE				cis-acting regulatory element essential for the anaerobic induction
RcMYB26	CCG027619.1	1805	1845	ARE				cis-acting regulatory element essential for the anaerobic induction
RcMYB26	CCG027619.1	432	472	CGTCA-motif				cis-acting regulatory element involved in the MeJA-responsiveness
RcMYB26	CCG027619.1	442	482	G-box				cis-acting regulatory element involved in light responsiveness
RcMYB26	CCG027619.1	1420	1460	G-box				cis-acting regulatory element involved in light responsiveness
RcMYB26	CCG027619.1	759	799	GATA-motif				part of a light responsive element
RcMYB26	CCG027619.1	10	50	ABRE				cis-acting element involved in the abscisic acid responsiveness
RcMYB26	CCG027619.1	443	483	ABRE				cis-acting element involved in the abscisic acid responsiveness
RcMYB26	CCG027619.1	1321	1361	MBS				MYB binding site involved in drought-inducibility
RcMYB26	CCG027619.1	1337	1377	TCA-element				cis-acting element involved in salicylic acid responsiveness
RcMYB26	CCG027619.1	9	49	G-Box				cis-acting regulatory element involved in light responsiveness
RcMYB26	CCG027619.1	523	563	GT1-motif				light responsive element
RcMYB26	CCG027619.1	-8	32	CAAT-box				common cis-acting element in promoter and enhancer regions
RcMYB26	CCG027619.1	245	285	CAAT-box				common cis-acting element in promoter and enhancer regions
RcMYB26	CCG027619.1	315	355	CAAT-box				common cis-acting element in promoter and enhancer regions
RcMYB26	CCG027619.1	849	889	CAAT-box				common cis-acting element in promoter and enhancer regions
RcMYB26	CCG027619.1	893	933	CAAT-box				common cis-acting element in promoter and enhancer regions
RcMYB26	CCG027619.1	1062	1102	CAAT-box				common cis-acting element in promoter and enhancer regions
RcMYB26	CCG027619.1	1067	1107	CAAT-box				common cis-acting element in promoter and enhancer regions
RcMYB26	CCG027619.1	1330	1370	CAAT-box				common cis-acting element in promoter and enhancer regions
RcMYB26	CCG027619.1	1438	1478	CAAT-box				common cis-acting element in promoter and enhancer regions
RcMYB26	CCG027619.1	1463	1503	CAAT-box				common cis-acting element in promoter and enhancer regions
RcMYB26	CCG027619.1	1464	1504	CAAT-box				common cis-acting element in promoter and enhancer regions
RcMYB26	CCG027619.1	1544	1584	CAAT-box				common cis-acting element in promoter and enhancer regions
RcMYB26	CCG027619.1	1257	1297	TCT-motif				part of a light responsive element
RcMYB26	CCG027619.1	1407	1447	TCT-motif				part of a light responsive element
RcMYB26	CCG027619.1	1501	1541	TCT-motif				part of a light responsive element
RcMYB26	CCG027619.1	1568	1608	TCT-motif				part of a light responsive element
RcMYB26	CCG027619.1	49	89	TATA-box				core promoter element around -30 of transcription start
RcMYB26	CCG027619.1	50	90	TATA-box				core promoter element around -30 of transcription start
RcMYB26	CCG027619.1	51	91	TATA-box				core promoter element around -30 of transcription start
RcMYB26	CCG027619.1	80	120	TATA-box				core promoter element around -30 of transcription start
RcMYB26	CCG027619.1	1187	1227	TATA-box				core promoter element around -30 of transcription start
RcMYB26	CCG027619.1	1390	1430	TATA-box				core promoter element around -30 of transcription start
RcMYB26	CCG027619.1	1713	1753	TATA-box				core promoter element around -30 of transcription start
RcMYB26	CCG027619.1	1714	1754	TATA-box				core promoter element around -30 of transcription start
RcMYB26	CCG027619.1	1715	1755	TATA-box				core promoter element around -30 of transcription start
RcMYB26	CCG027619.1	1716	1756	TATA-box				core promoter element around -30 of transcription start
RcMYB26	CCG027619.1	1785	1825	TATA-box				core promoter element around -30 of transcription start
RcMYB26	CCG027619.1	1786	1826	TATA-box				core promoter element around -30 of transcription start
RcMYB26	CCG027619.1	1787	1827	TATA-box				core promoter element around -30 of transcription start
RcMYB26	CCG027619.1	1872	1912	TATA-box				core promoter element around -30 of transcription start
RcMYB26	CCG027619.1	1874	1914	TATA-box				core promoter element around -30 of transcription start
RcMYB26	CCG027619.1	1879	1919	TATA-box				core promoter element around -30 of transcription start
RcMYB26	CCG027619.1	1880	1920	TATA-box				core promoter element around -30 of transcription start
RcMYB26	CCG027619.1	757	797	I-box				part of a light responsive element
RcMYB26	CCG027619.1	759	799	I-box				part of a light responsive element
RcMYB26	CCG027619.1	105	145	LTR				cis-acting element involved in low-temperature responsiveness
RcMYB26	CCG027619.1	151	191	LTR				cis-acting element involved in low-temperature responsiveness
RcMYB26	CCG027619.1	216	256	LTR				cis-acting element involved in low-temperature responsiveness
RcMYB26	CCG027619.1	432	472	TGACG-motif				cis-acting regulatory element involved in the MeJA-responsiveness
RcMYB27	CCG028160.1	1145	1185	G-Box				cis-acting regulatory element involved in light responsiveness
RcMYB27	CCG028160.1	419	459	O2-site				cis-acting regulatory element involved in zein metabolism regulation
RcMYB27	CCG028160.1	1093	1133	ABRE				cis-acting element involved in the abscisic acid responsiveness
RcMYB27	CCG028160.1	1146	1186	ABRE				cis-acting element involved in the abscisic acid responsiveness
RcMYB27	CCG028160.1	1292	1332	ABRE				cis-acting element involved in the abscisic acid responsiveness
RcMYB27	CCG028160.1	1752	1792	ABRE				cis-acting element involved in the abscisic acid responsiveness
RcMYB27	CCG028160.1	1716	1756	GATA-motif				part of a light responsive element
RcMYB27	CCG028160.1	785	825	TCCC-motif				part of a light responsive element
RcMYB27	CCG028160.1	1216	1256	CGTCA-motif				cis-acting regulatory element involved in the MeJA-responsiveness
RcMYB27	CCG028160.1	1290	1330	CGTCA-motif				cis-acting regulatory element involved in the MeJA-responsiveness
RcMYB27	CCG028160.1	1291	1331	G-box				cis-acting regulatory element involved in light responsiveness
RcMYB27	CCG028160.1	4	44	ARE				cis-acting regulatory element essential for the anaerobic induction
RcMYB27	CCG028160.1	57	97	CAT-box				cis-acting regulatory element related to meristem expression
RcMYB27	CCG028160.1	460	500	CAT-box				cis-acting regulatory element related to meristem expression
RcMYB27	CCG028160.1	464	504	CAT-box				cis-acting regulatory element related to meristem expression
RcMYB27	CCG028160.1	656	696	Box 4				part of a conserved DNA module involved in light responsiveness
RcMYB27	CCG028160.1	1216	1256	TGACG-motif				cis-acting regulatory element involved in the MeJA-responsiveness
RcMYB27	CCG028160.1	1290	1330	TGACG-motif				cis-acting regulatory element involved in the MeJA-responsiveness
RcMYB27	CCG028160.1	352	392	LTR				cis-acting element involved in low-temperature responsiveness
RcMYB27	CCG028160.1	1385	1425	CCAAT-box				MYBHv1 binding site
RcMYB27	CCG028160.1	1308	1348	MRE				MYB binding site involved in light responsiveness
RcMYB27	CCG028160.1	1449	1489	MRE				MYB binding site involved in light responsiveness
RcMYB27	CCG028160.1	1231	1271	TGA-element				auxin-responsive element
RcMYB27	CCG028160.1	1504	1544	AE-box				part of a module for light response
RcMYB27	CCG028160.1	63	103	TATA-box				core promoter element around -30 of transcription start
RcMYB27	CCG028160.1	64	104	TATA-box				core promoter element around -30 of transcription start
RcMYB27	CCG028160.1	76	116	TATA-box				core promoter element around -30 of transcription start
RcMYB27	CCG028160.1	106	146	TATA-box				core promoter element around -30 of transcription start
RcMYB27	CCG028160.1	107	147	TATA-box				core promoter element around -30 of transcription start
RcMYB27	CCG028160.1	108	148	TATA-box				core promoter element around -30 of transcription start
RcMYB27	CCG028160.1	109	149	TATA-box				core promoter element around -30 of transcription start
RcMYB27	CCG028160.1	571	611	TATA-box				core promoter element around -30 of transcription start
RcMYB27	CCG028160.1	651	691	TATA-box				core promoter element around -30 of transcription start
RcMYB27	CCG028160.1	652	692	TATA-box				core promoter element around -30 of transcription start
RcMYB27	CCG028160.1	653	693	TATA-box				core promoter element around -30 of transcription start
RcMYB27	CCG028160.1	707	747	TATA-box				core promoter element around -30 of transcription start
RcMYB27	CCG028160.1	865	905	TATA-box				core promoter element around -30 of transcription start
RcMYB27	CCG028160.1	866	906	TATA-box				core promoter element around -30 of transcription start
RcMYB27	CCG028160.1	867	907	TATA-box				core promoter element around -30 of transcription start
RcMYB27	CCG028160.1	868	908	TATA-box				core promoter element around -30 of transcription start
RcMYB27	CCG028160.1	869	909	TATA-box				core promoter element around -30 of transcription start
RcMYB27	CCG028160.1	905	945	TATA-box				core promoter element around -30 of transcription start
RcMYB27	CCG028160.1	906	946	TATA-box				core promoter element around -30 of transcription start
RcMYB27	CCG028160.1	1180	1220	TATA-box				core promoter element around -30 of transcription start
RcMYB27	CCG028160.1	1195	1235	TATA-box				core promoter element around -30 of transcription start
RcMYB27	CCG028160.1	1278	1318	TATA-box				core promoter element around -30 of transcription start
RcMYB27	CCG028160.1	1339	1379	TATA-box				core promoter element around -30 of transcription start
RcMYB27	CCG028160.1	1340	1380	TATA-box				core promoter element around -30 of transcription start
RcMYB27	CCG028160.1	1341	1381	TATA-box				core promoter element around -30 of transcription start
RcMYB27	CCG028160.1	1342	1382	TATA-box				core promoter element around -30 of transcription start
RcMYB27	CCG028160.1	1815	1855	TATA-box				core promoter element around -30 of transcription start
RcMYB27	CCG028160.1	1817	1857	TATA-box				core promoter element around -30 of transcription start
RcMYB27	CCG028160.1	370	410	TCT-motif				part of a light responsive element
RcMYB27	CCG028160.1	-13	27	CAAT-box				common cis-acting element in promoter and enhancer regions
RcMYB27	CCG028160.1	185	225	CAAT-box				common cis-acting element in promoter and enhancer regions
RcMYB27	CCG028160.1	324	364	CAAT-box				common cis-acting element in promoter and enhancer regions
RcMYB27	CCG028160.1	388	428	CAAT-box				common cis-acting element in promoter and enhancer regions
RcMYB27	CCG028160.1	483	523	CAAT-box				common cis-acting element in promoter and enhancer regions
RcMYB27	CCG028160.1	546	586	CAAT-box				common cis-acting element in promoter and enhancer regions
RcMYB27	CCG028160.1	591	631	CAAT-box				common cis-acting element in promoter and enhancer regions
RcMYB27	CCG028160.1	882	922	CAAT-box				common cis-acting element in promoter and enhancer regions
RcMYB27	CCG028160.1	1008	1048	CAAT-box				common cis-acting element in promoter and enhancer regions
RcMYB27	CCG028160.1	1028	1068	CAAT-box				common cis-acting element in promoter and enhancer regions
RcMYB27	CCG028160.1	1059	1099	CAAT-box				common cis-acting element in promoter and enhancer regions
RcMYB27	CCG028160.1	1361	1401	CAAT-box				common cis-acting element in promoter and enhancer regions
RcMYB27	CCG028160.1	1523	1563	CAAT-box				common cis-acting element in promoter and enhancer regions
RcMYB27	CCG028160.1	1608	1648	CAAT-box				common cis-acting element in promoter and enhancer regions
RcMYB27	CCG028160.1	1662	1702	CAAT-box				common cis-acting element in promoter and enhancer regions
RcMYB27	CCG028160.1	1676	1716	CAAT-box				common cis-acting element in promoter and enhancer regions
RcMYB27	CCG028160.1	1788	1828	CAAT-box				common cis-acting element in promoter and enhancer regions
RcMYB27	CCG028160.1	1805	1845	CAAT-box				common cis-acting element in promoter and enhancer regions
RcMYB27	CCG028160.1	1839	1879	CAAT-box				common cis-acting element in promoter and enhancer regions
RcMYB27	CCG028160.1	1921	1961	CAAT-box				common cis-acting element in promoter and enhancer regions
RcMYB28	CCG028627.1	1843	1883	TCT-motif				part of a light responsive element
RcMYB28	CCG028627.1	202	242	TATA-box				core promoter element around -30 of transcription start
RcMYB28	CCG028627.1	203	243	TATA-box				core promoter element around -30 of transcription start
RcMYB28	CCG028627.1	204	244	TATA-box				core promoter element around -30 of transcription start
RcMYB28	CCG028627.1	205	245	TATA-box				core promoter element around -30 of transcription start
RcMYB28	CCG028627.1	210	250	TATA-box				core promoter element around -30 of transcription start
RcMYB28	CCG028627.1	221	261	TATA-box				core promoter element around -30 of transcription start
RcMYB28	CCG028627.1	222	262	TATA-box				core promoter element around -30 of transcription start
RcMYB28	CCG028627.1	223	263	TATA-box				core promoter element around -30 of transcription start
RcMYB28	CCG028627.1	455	495	TATA-box				core promoter element around -30 of transcription start
RcMYB28	CCG028627.1	456	496	TATA-box				core promoter element around -30 of transcription start
RcMYB28	CCG028627.1	457	497	TATA-box				core promoter element around -30 of transcription start
RcMYB28	CCG028627.1	458	498	TATA-box				core promoter element around -30 of transcription start
RcMYB28	CCG028627.1	459	499	TATA-box				core promoter element around -30 of transcription start
[truncated: 7,670 more rows]
